# Supplementary material for: Genome sequence of the Japanese oak silk moth, Antheraea yamamai: the first draft genome in the family Saturniidae
Source: PubMed Central journal article supplement (PMC5774507; doi:10.1093/gigascience/gix113), 2017-11-27
Supplement: gix113_giga-d-17-00085_original-submission.pdf [file gix113_giga-d-17-00085_original-submission.pdf]

|                                                      |                                                                                                                                                                                                                                                                                                                                                                                                                                                                                                                                                                                                                                                                                                                                                                                                                                                                                                                                                                                                                                                                                                                                                                                                                                                                                                                                                                                                                                                                                                                                                                                                                                                                                                                                  |                   |
|------------------------------------------------------|----------------------------------------------------------------------------------------------------------------------------------------------------------------------------------------------------------------------------------------------------------------------------------------------------------------------------------------------------------------------------------------------------------------------------------------------------------------------------------------------------------------------------------------------------------------------------------------------------------------------------------------------------------------------------------------------------------------------------------------------------------------------------------------------------------------------------------------------------------------------------------------------------------------------------------------------------------------------------------------------------------------------------------------------------------------------------------------------------------------------------------------------------------------------------------------------------------------------------------------------------------------------------------------------------------------------------------------------------------------------------------------------------------------------------------------------------------------------------------------------------------------------------------------------------------------------------------------------------------------------------------------------------------------------------------------------------------------------------------|-------------------|
| <b>Manuscript Number:</b>                            | GIGA-D-17-00085                                                                                                                                                                                                                                                                                                                                                                                                                                                                                                                                                                                                                                                                                                                                                                                                                                                                                                                                                                                                                                                                                                                                                                                                                                                                                                                                                                                                                                                                                                                                                                                                                                                                                                                  |                   |
| <b>Full Title:</b>                                   | First wild silkworm genome of Japanese silk moth, <i>Antheraea yamamai</i>                                                                                                                                                                                                                                                                                                                                                                                                                                                                                                                                                                                                                                                                                                                                                                                                                                                                                                                                                                                                                                                                                                                                                                                                                                                                                                                                                                                                                                                                                                                                                                                                                                                       |                   |
| <b>Article Type:</b>                                 | Data Note                                                                                                                                                                                                                                                                                                                                                                                                                                                                                                                                                                                                                                                                                                                                                                                                                                                                                                                                                                                                                                                                                                                                                                                                                                                                                                                                                                                                                                                                                                                                                                                                                                                                                                                        |                   |
| <b>Funding Information:</b>                          | Rural Development Administration (PJ010442)                                                                                                                                                                                                                                                                                                                                                                                                                                                                                                                                                                                                                                                                                                                                                                                                                                                                                                                                                                                                                                                                                                                                                                                                                                                                                                                                                                                                                                                                                                                                                                                                                                                                                      | Dr Seong-Ryul Kim |
| <b>Abstract:</b>                                     | <p><b>Background</b><br/> <i>Antheraea yamamai</i> is one of wild silkworm species known as Japanese silk moth. Silk of <i>A. yamamai</i>, called tensan silk, shows large differences characteristics compared to common silk produced from domesticated silkworm, <i>Bombyx mori</i>. Therefore, it is utilized in many research fields including biotechnology and medical science, and scientific as well as economic importance of wild silkworm is constantly increasing. However, no genomic information for wild silkworm including <i>A. yamamai</i> is currently available.</p> <p><b>Findings</b><br/>                     For constructing the <i>A. yamamai</i> genome, a total of 147G base pairs using Illumina and Pacbio sequencing platforms were generated and it was 210-fold coverage based on the 700 Mb estimated genome size of <i>A. yamamai</i>. Assembled genome of <i>A. yamamai</i> was 656 Mb(&gt;2kb) with 3,675 scaffolds and N50 length of assembly was 739 Kb with 34.07% GC ratio. Identified repeat element covered 37.33% of total genome and the completeness of genome assembly was estimated to be 96.7% by BUSCO v2 analysis. A total of 21,124 genes were identified using Evidence Modeler based on the gene prediction results from 3 different methods (ab initio, RNA-seq based, known gene based).</p> <p><b>Conclusions</b><br/>                     Here we present the genome sequence of <i>A. yamamai</i>, the first genome sequence of wild silkworm. Our result will provide valuable genomic information for understanding the molecular mechanisms related to the specific phenotypes such as wild silk itself, and more insight into Saturniidae evolution process.</p> |                   |
| <b>Corresponding Author:</b>                         | Seung-Won Park<br><br>KOREA, REPUBLIC OF                                                                                                                                                                                                                                                                                                                                                                                                                                                                                                                                                                                                                                                                                                                                                                                                                                                                                                                                                                                                                                                                                                                                                                                                                                                                                                                                                                                                                                                                                                                                                                                                                                                                                         |                   |
| <b>Corresponding Author Secondary Information:</b>   |                                                                                                                                                                                                                                                                                                                                                                                                                                                                                                                                                                                                                                                                                                                                                                                                                                                                                                                                                                                                                                                                                                                                                                                                                                                                                                                                                                                                                                                                                                                                                                                                                                                                                                                                  |                   |
| <b>Corresponding Author's Institution:</b>           |                                                                                                                                                                                                                                                                                                                                                                                                                                                                                                                                                                                                                                                                                                                                                                                                                                                                                                                                                                                                                                                                                                                                                                                                                                                                                                                                                                                                                                                                                                                                                                                                                                                                                                                                  |                   |
| <b>Corresponding Author's Secondary Institution:</b> |                                                                                                                                                                                                                                                                                                                                                                                                                                                                                                                                                                                                                                                                                                                                                                                                                                                                                                                                                                                                                                                                                                                                                                                                                                                                                                                                                                                                                                                                                                                                                                                                                                                                                                                                  |                   |
| <b>First Author:</b>                                 | Seong-Ryul Kim                                                                                                                                                                                                                                                                                                                                                                                                                                                                                                                                                                                                                                                                                                                                                                                                                                                                                                                                                                                                                                                                                                                                                                                                                                                                                                                                                                                                                                                                                                                                                                                                                                                                                                                   |                   |
| <b>First Author Secondary Information:</b>           |                                                                                                                                                                                                                                                                                                                                                                                                                                                                                                                                                                                                                                                                                                                                                                                                                                                                                                                                                                                                                                                                                                                                                                                                                                                                                                                                                                                                                                                                                                                                                                                                                                                                                                                                  |                   |
| <b>Order of Authors:</b>                             | Seong-Ryul Kim                                                                                                                                                                                                                                                                                                                                                                                                                                                                                                                                                                                                                                                                                                                                                                                                                                                                                                                                                                                                                                                                                                                                                                                                                                                                                                                                                                                                                                                                                                                                                                                                                                                                                                                   |                   |
|                                                      | Woori Kwak                                                                                                                                                                                                                                                                                                                                                                                                                                                                                                                                                                                                                                                                                                                                                                                                                                                                                                                                                                                                                                                                                                                                                                                                                                                                                                                                                                                                                                                                                                                                                                                                                                                                                                                       |                   |
|                                                      | Kee-Young Kim                                                                                                                                                                                                                                                                                                                                                                                                                                                                                                                                                                                                                                                                                                                                                                                                                                                                                                                                                                                                                                                                                                                                                                                                                                                                                                                                                                                                                                                                                                                                                                                                                                                                                                                    |                   |
|                                                      | Su-Bae Kim                                                                                                                                                                                                                                                                                                                                                                                                                                                                                                                                                                                                                                                                                                                                                                                                                                                                                                                                                                                                                                                                                                                                                                                                                                                                                                                                                                                                                                                                                                                                                                                                                                                                                                                       |                   |
|                                                      | Kwang-Ho Choi                                                                                                                                                                                                                                                                                                                                                                                                                                                                                                                                                                                                                                                                                                                                                                                                                                                                                                                                                                                                                                                                                                                                                                                                                                                                                                                                                                                                                                                                                                                                                                                                                                                                                                                    |                   |
|                                                      | Seong-Wan Kim                                                                                                                                                                                                                                                                                                                                                                                                                                                                                                                                                                                                                                                                                                                                                                                                                                                                                                                                                                                                                                                                                                                                                                                                                                                                                                                                                                                                                                                                                                                                                                                                                                                                                                                    |                   |
|                                                      | Jae-Sam Hwang                                                                                                                                                                                                                                                                                                                                                                                                                                                                                                                                                                                                                                                                                                                                                                                                                                                                                                                                                                                                                                                                                                                                                                                                                                                                                                                                                                                                                                                                                                                                                                                                                                                                                                                    |                   |
|                                                      | Iksoo Kim                                                                                                                                                                                                                                                                                                                                                                                                                                                                                                                                                                                                                                                                                                                                                                                                                                                                                                                                                                                                                                                                                                                                                                                                                                                                                                                                                                                                                                                                                                                                                                                                                                                                                                                        |                   |
|                                                      | Tae-Won Goo                                                                                                                                                                                                                                                                                                                                                                                                                                                                                                                                                                                                                                                                                                                                                                                                                                                                                                                                                                                                                                                                                                                                                                                                                                                                                                                                                                                                                                                                                                                                                                                                                                                                                                                      |                   |

|                                                                                                                                                                                                                                                                                                                                                                                                                                                                                                                                                         |                 |
|---------------------------------------------------------------------------------------------------------------------------------------------------------------------------------------------------------------------------------------------------------------------------------------------------------------------------------------------------------------------------------------------------------------------------------------------------------------------------------------------------------------------------------------------------------|-----------------|
|                                                                                                                                                                                                                                                                                                                                                                                                                                                                                                                                                         | Seung-Won Park  |
| <b>Order of Authors Secondary Information:</b>                                                                                                                                                                                                                                                                                                                                                                                                                                                                                                          |                 |
| <b>Opposed Reviewers:</b>                                                                                                                                                                                                                                                                                                                                                                                                                                                                                                                               |                 |
| <b>Additional Information:</b>                                                                                                                                                                                                                                                                                                                                                                                                                                                                                                                          |                 |
| <b>Question</b>                                                                                                                                                                                                                                                                                                                                                                                                                                                                                                                                         | <b>Response</b> |
| Are you submitting this manuscript to a special series or article collection?                                                                                                                                                                                                                                                                                                                                                                                                                                                                           | No              |
| <p><b>Experimental design and statistics</b></p> <p>Full details of the experimental design and statistical methods used should be given in the Methods section, as detailed in our <a href="#">Minimum Standards Reporting Checklist</a>. Information essential to interpreting the data presented should be made available in the figure legends.</p> <p>Have you included all the information requested in your manuscript?</p>                                                                                                                      | Yes             |
| <p><b>Resources</b></p> <p>A description of all resources used, including antibodies, cell lines, animals and software tools, with enough information to allow them to be uniquely identified, should be included in the Methods section. Authors are strongly encouraged to cite <a href="#">Research Resource Identifiers</a> (RRIDs) for antibodies, model organisms and tools, where possible.</p> <p>Have you included the information requested as detailed in our <a href="#">Minimum Standards Reporting Checklist</a>?</p>                     | Yes             |
| <p><b>Availability of data and materials</b></p> <p>All datasets and code on which the conclusions of the paper rely must be either included in your submission or deposited in <a href="#">publicly available repositories</a> (where available and ethically appropriate), referencing such data using a unique identifier in the references and in the "Availability of Data and Materials" section of your manuscript.</p> <p>Have you have met the above requirement as detailed in our <a href="#">Minimum Standards Reporting Checklist</a>?</p> | Yes             |

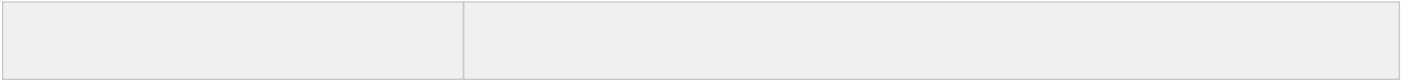

1 **First wild silkworm genome of Japanese silk moth, *Antheraea***  
2  
3  
4 ***yamamai***  
5  
6  
7

8 **Seong-Ryul Kim<sup>1†</sup>, Woori Kwak<sup>2†</sup>, Kee-Young Kim<sup>1</sup>, Su-Bae Kim<sup>1</sup>, Kwang-Ho Choi<sup>1</sup>,**  
9  
10 **Seong-Wan Kim<sup>1</sup>, Jae-Sam Hwang<sup>1</sup>, Iksoo Kim<sup>3</sup>, Tae-Won Goo<sup>4</sup> and Seung-Won Park<sup>5\*</sup>**  
11  
12

13 <sup>1</sup>Department of Agricultural Biology, National Academy of Agricultural Science, Rural  
14 Development Administration, Wanju-gun 55365, Republic of Korea; <sup>2</sup>C&K Genomics, Main  
15 Bldg. #420, SNU Research Park, Seoul 151-919, Republic of Korea; <sup>3</sup>College of Agriculture  
16 & Life Sciences, Chonnam National University, Gwangju, Republic of Korea; <sup>4</sup>Department of  
17 Biochemistry, Dongguk University College of Medicine, Gyeongju-si, Gyeongsangbuk-do  
18 38066, Republic of Korea; <sup>5</sup>Department of Biotechnology, Catholic University of Daegu,  
19 Gyeongsan-si, Gyeongsangbuk-do 38430, Republic of Korea  
20  
21  
22  
23  
24  
25  
26  
27  
28  
29  
30

31  
32  
33  
34  
35 Seong-Ryul Kim : [ksr319@korea.kr](mailto:ksr319@korea.kr); Woori Kwak : [asleo@cnkgenomics.com](mailto:asleo@cnkgenomics.com); Kee-Young  
36  
37 Kim : [kkyoung@korea.kr](mailto:kkyoung@korea.kr); Su-Bae Kim : [subae@korea.kr](mailto:subae@korea.kr); Kwang-Ho Choi : [ckh@korea.kr](mailto:ckh@korea.kr);  
38  
39 Seong-Wan; Seong-Wan Kim : [tarupa@korea.kr](mailto:tarupa@korea.kr); Jae-Sam Hwang : [hwangjs@korea.kr](mailto:hwangjs@korea.kr); Iksoo  
40  
41 Kim : [ikkim81@chonnam.ac.kr](mailto:ikkim81@chonnam.ac.kr); Tae-Won Goo : [gootw@dongguk.ac.kr](mailto:gootw@dongguk.ac.kr)  
42  
43  
44

45 † These authors equally contributed and should be regarded as co-first authors.  
46  
47  
48  
49  
50

51 \* Corresponding authors  
52

53 Seung-Won Park  
54  
55

56 Department of Biotechnology,  
57  
58

59 Catholic University of Daegu,  
60  
61  
62  
63  
64  
65

1 Gyeongsan-si, Gyeongsangbuk-do 38430, Republic of Korea  
2  
3

4 Phone : +82-53-850-3176  
5

6  
7 Fax : +82-53-359-6846  
8

9  
10 E-mail: [microsw@cu.ac.kr](mailto:microsw@cu.ac.kr)  
11  
12  
13  
14  
15  
16  
17  
18  
19  
20  
21  
22  
23  
24  
25  
26  
27  
28  
29  
30  
31  
32  
33  
34  
35  
36  
37  
38  
39  
40  
41  
42  
43  
44  
45  
46  
47  
48  
49  
50  
51  
52  
53  
54  
55  
56  
57  
58  
59  
60  
61  
62  
63  
64  
65

# Abstract

## Background

*Antheraea yamamai* is one of wild silkworm species known as Japanese silk moth. Silk of *A. yamamai*, called *tensan* silk, shows large differences characteristics compared to common silk produced from domesticated silkworm, *Bombyx mori*. Therefore, it is utilized in many research fields including biotechnology and medical science, and scientific as well as economic importance of wild silkworm is constantly increasing. However, no genomic information for wild silkworm including *A. yamamai* is currently available.

## Findings

For constructing the *A. yamamai* genome, a total of 147G base pairs using Illumina and Pacbio sequencing platforms were generated and it was 210-fold coverage based on the 700 Mb estimated genome size of *A. yamamai*. Assembled genome of *A. yamamai* was 656 Mb(>2kb) with 3,675 scaffolds and N50 length of assembly was 739 Kb with 34.07% GC ratio. Identified repeat element covered 37.33% of total genome and the completeness of genome assembly was estimated to be 96.7% by BUSCO v2 analysis. A total of 21,124 genes were identified using Evidence Modeler based on the gene prediction results from 3 different methods (*ab initio*, RNA-seq based, known gene based).

## Conclusions

Here we present the genome sequence of *A. yamamai*, the first genome sequence of wild silkworm. Our result will provide valuable genomic information for understanding the molecular mechanisms related to the specific phenotypes such as wild silk itself, and more insight into Saturniidae evolution process.

|    |    |                                                                                       |
|----|----|---------------------------------------------------------------------------------------|
| 1  | 23 | <b>Keywords</b>                                                                       |
| 2  |    |                                                                                       |
| 3  |    |                                                                                       |
| 4  | 24 | <i>Antheraea yamamai</i> , Japanese silk moth, Japanese oak silkmother, wild silkworm |
| 5  |    |                                                                                       |
| 6  |    |                                                                                       |
| 7  |    |                                                                                       |
| 8  |    |                                                                                       |
| 9  |    |                                                                                       |
| 10 |    |                                                                                       |
| 11 |    |                                                                                       |
| 12 |    |                                                                                       |
| 13 |    |                                                                                       |
| 14 |    |                                                                                       |
| 15 |    |                                                                                       |
| 16 |    |                                                                                       |
| 17 |    |                                                                                       |
| 18 |    |                                                                                       |
| 19 |    |                                                                                       |
| 20 |    |                                                                                       |
| 21 |    |                                                                                       |
| 22 |    |                                                                                       |
| 23 |    |                                                                                       |
| 24 |    |                                                                                       |
| 25 |    |                                                                                       |
| 26 |    |                                                                                       |
| 27 |    |                                                                                       |
| 28 |    |                                                                                       |
| 29 |    |                                                                                       |
| 30 |    |                                                                                       |
| 31 |    |                                                                                       |
| 32 |    |                                                                                       |
| 33 |    |                                                                                       |
| 34 |    |                                                                                       |
| 35 |    |                                                                                       |
| 36 |    |                                                                                       |
| 37 |    |                                                                                       |
| 38 |    |                                                                                       |
| 39 |    |                                                                                       |
| 40 |    |                                                                                       |
| 41 |    |                                                                                       |
| 42 |    |                                                                                       |
| 43 |    |                                                                                       |
| 44 |    |                                                                                       |
| 45 |    |                                                                                       |
| 46 |    |                                                                                       |
| 47 |    |                                                                                       |
| 48 |    |                                                                                       |
| 49 |    |                                                                                       |
| 50 |    |                                                                                       |
| 51 |    |                                                                                       |
| 52 |    |                                                                                       |
| 53 |    |                                                                                       |
| 54 |    |                                                                                       |
| 55 |    |                                                                                       |
| 56 |    |                                                                                       |
| 57 |    |                                                                                       |
| 58 |    |                                                                                       |
| 59 |    |                                                                                       |
| 60 |    |                                                                                       |
| 61 |    |                                                                                       |
| 62 |    |                                                                                       |
| 63 |    |                                                                                       |
| 64 |    |                                                                                       |
| 65 |    |                                                                                       |

## Data description

*Antheraea yamamai* (Figure 1) known as Japanese silk moth is one of wild silkworm species belongs to the Saturniidae family. The most specific phenotypic trait of this species is silk, called tensan silk[1]. It shows characteristics such as thickness, bulkiness, compressive elasticity, resistance to chemicals compared to common silk from domesticated silkworm[2-4], *Bombyx mori*, and it is utilized as a new biomaterial for various fields[5-7]. In addition, various studies have been in place using peptides from *A. yamamai* for human health[8-11]. In spite of these academic and economical importance of wild silkworm including *A. yamamai*, however, no genomic information is currently available for any wild silkworm species. In this study, we present the first wild silkworm genome, *A. yamamai*, with gene expression data of ten different body organ tissues. We expect that the first wild silkworm genome for *A. yamamai* can be the fundamental genomic resource for various wild silkworm researches, and our data will provide more insight into the underlying molecular mechanisms of silk production process in wild silkworms and its specific characteristics.

## Sequencing

For whole genome sequencing, we selected one male sample(Ay-7-male1) from the breeding line(Ay-7) of *A. yamamai* in National Academy of Agricultural Science, Rural Development Administration, Korea. Before conducting sequencing analysis, we conducted karyotyping analysis to confirm the number of chromosomes and chromosome abnormality using a gamete in metaphase. Figure 2 shows the result of karyotyping analysis and the genome of Japanese Silkworm consist of 31 chromosomes. Before DNA isolation, we removed guts of *A. yamamai* to prevent contamination of genomes from other organisms such as gut microbes and oak, the



1 48 main food of *A. yamamai*. Genomic DNA was extracted using a DNeasy Animal Mini Kit  
2  
3 49 (Qiagen, Hilden, Germany) and the quality of extracted DNA was checked using trenean,  
4  
5 50 picogreen assay and gel electrophoresis (1% agarose gel/ 40ng loading). We got a total 61.5ug  
6  
7 51 of *A. yamamai* DNA for genome sequencing after quality control process. With the standard  
8  
9 52 Illumina whole genome shotgun(WGS) sequencing protocol (paired-end and mate-pair), we  
10  
11 53 added two long read sequencing platforms, Molecuro (Illumina synthetic long read) and RS  
12  
13 54 II(Pacific Bioscience). Table 1-3 shows summary of generated data information for each library  
14  
15 55 used in this study. And we also constructed RNA-seq libraries for genome annotation and  
16  
17 56 specific gene expression of 10 different tissues (Hemocyste, Malpighi, Midgut, Fat Body,  
18  
19 57 AM/Silk gland, P/Sild gland, Head, Skin, Testis, Ovary) with 3 biological replications  
20  
21 58 following the standard protocol of manufacturer (Illumina, San Diego, CA, USA). For this,  
22  
23 59 more than 100 individual *A. yamamai* samples in same breeding line were used for tissue  
24  
25 60 anatomy and 3 samples in each tissue were selected based on the quality of extracted RNA.  
26  
27 61 Information of libraries and generated data is shown in Table 4. Total 147Gb for genome and  
28  
29 62 76Gb for transcriptome data were generated for this study.  
30  
31  
32  
33  
34  
35  
36  
37  
38  
39  
40  
41

## 42 64 **Genome assembly and evaluation**

43  
44  
45 65 Before conducting genome assembly, we conducted k-mer distribution analysis using 350bp  
46  
47 66 paired-end library to identify the genomic characteristics and estimate the genome size. Quality  
48  
49 67 of generated raw data was checked with FASTQC[12]. Sequencing artifacts such as adapter  
50  
51 68 sequences and low quality bases were removed using Trimmomatic[13]. Jellyfish[14] was used  
52  
53 69 to count the k-mer frequency and genome size of *A. yamamai* was estimated. Figure 3 shows  
54  
55 70 the 19-mer distribution of *A. yamamai* genome using 350bp paired-end library. In 19-mer  
56  
57  
58  
59  
60  
61  
62  
63  
64  
65

1 71 distribution, there was a second peak in the half x-axis of the main peak which indicate the  
2  
3 72 heterozygosity. Our inbreeding line was maintained more than 10 generations, but high  
4  
5  
6 73 heterozygosity still remained. This phenomenon was observed in the previous genome study  
7  
8 74 of black diamond moth (*Plutella xylostella*) and sustained heterozygosity is one of the  
9  
10  
11 75 important genomic characteristics related to the environmental adaption[15]. Based on the  
12  
13 76 result of 19-mer distribution analysis, the genome size of *A. yamamai* genome was the  
14  
15  
16 77 estimated as approximately 709Mb. We conducted error correction for Illumina paired-end  
17  
18 78 libraries using error correction module of Allpaths-LG[16] before initial contig assembly  
19  
20  
21 79 process. After error correction, initial contig assembly with 350bp and 700bp libraries was  
22  
23 80 conducted using SOAP denovo2[17] with K=19 parameter option which showed best assembly  
24  
25 81 statistics compared to other assemblers with various parameter. Quality control process for  
26  
27  
28 82 mate-pair libraries and scaffolding process were conducted using Nxtrim[18] and SSPACE[19],  
29  
30  
31 83 respectively. In each scaffolding step, SOAP Gapcloser[17] with -l 155 and -p 31 parameters  
32  
33 84 were repeatedly used to close the gaps within each scaffold. For more high quality genome  
34  
35 85 assembly of *A. yamamai*, we employed long read scaffolding strategies using SSPACE-  
36  
37  
38 86 LongRead[20]. First, we used Illumina synthetic long read sequencing platform called  
39  
40 87 Moleclo which showed its value for high heterozygous genome same as *A. yamamai* in  
41  
42  
43 88 previous study[21, 22]. After scaffolding process using SSPACE-LongRead with Illumina  
44  
45 89 synthetic long read data, the total number of assembled scaffolds was effectively reduced to  
46  
47  
48 90 24,558 from 398,446. And the average scaffold length was also extended from 1.7 Kb to 24.8  
49  
50  
51 91 Kb. However, there was no impressive improvement in N50 length (approximately 91 Kb to  
52  
53  
54 92 112 Kb) of assembled scaffolds. Therefore, we employed another type of long read data  
55  
56  
57 93 generated from 10 cells of Pacbio RS II system with P6-C4 chemistry. After final scaffolding  
58  
59  
60 94 process using Pacbio long reads, the number of scaffolds in assembled genome was reduced to  
61  
62  
63 95 3,675 and N50 length was effectively extended to 739 Kb from 112 Kb. Summary statistics for  
64  
65

1 96 assembled genome of *A. yamamai* is shown in Table 5. Final assembly of *A. yamamai* genome  
2  
3 97 was 656 Mb(>2kb) with 3,675 scaffolds and N50 length of assembly was 739 Kb with 34.07%  
4  
5  
6 98 GC ratio. To evaluate the quality of assembled genome, we conducted BUSCO (Benchmarking  
7  
8 99 Universal Single-Copy Orthologs) analysis[23] using BUSCO v2.0 with insecta\_odb9  
9  
10  
11 100 including 42 species and 1,658 BUSCOs. In BUSCO analysis, 96.7% of BUSCOs were  
12  
13 101 completely detected (1,576 – complete and single-copy, 27 – complete and duplicated) among  
14  
15  
16 102 1,658 tested BUSCOs in the assembled genome. The number of fragmented and missing  
17  
18 103 BUSCOs was 21 and 34, respectively. Based on the result of BUSCO analysis, assembled  
19  
20 104 genome of *A.yamamai* is considered properly assembled for various downstream analysis of  
21  
22  
23 105 many researchers.  
24  
25  
26 106  
27  
28  
29

## 30 107 **Repeat identification and comparative repeat analysis**

31  
32  
33

34 108 To identify the repeat element of *A. yamamai* genome, custom repeat library was constructed  
35  
36 109 using RepeatModeler with RECON[24], RepeatScout[25] and TRF[26]. Constructed custom  
37  
38  
39 110 repeat library for *A. yamamai* genome was more curated using CENSOR[27] search and  
40  
41 111 curated library was used in RepeatMasker[28] with Repbase[29]. RepeatMasker was employed  
42  
43  
44 112 with RMBlast and ‘no\_is’ option. Table 6 shows the summary statistics of identified mobile  
45  
46 113 elements and its proportion identified in *A. yamamai* genome. Most identified repeat element  
47  
48  
49 114 in *A. yamamai* genome was LINE element (101 Mb, 15.31% of total genome) and total repeat  
50  
51 115 elements accounted for 37.33% of *A. yamamai* genome. To compare the repeat elements of *A.*  
52  
53 116 *yamamai* genome with other genomes, we conducted same process for seven genomes  
54  
55  
56 117 including *Aedes aegypti*[30], *Bombyx mori*[31], *Danaus plexippus*[32], *Drosophila*  
57  
58 118 *melanogaster*[33], *Heliconius melpomene*[34], *Melitaea cinxia*[35] and *Plutella xylostella*[15],  
59  
60  
61  
62  
63  
64  
65

1 119 available genomes among close neighbors of *A. yamamai*. Figure 4 shows the amount and  
2  
3 120 proportion of identified repeat element from 8 species. Comparing repeat elements of *A.*  
4  
5  
6 121 *yamamai* with *B. mori*, same silk production species, the most frequently represented repeat  
7  
8 122 element was SINE element in *B. mori*. Even though *A. yamamai* and *B. mori* were evolutionary  
9  
10 123 close neighbor species among 8 species, types of identified repeat element in expansion showed  
11  
12  
13 124 species different pattern in silkworm lineage. In more details, top 5 expanded repeat elements  
14  
15 125 in *A. yamamai* genome were DNA/RC, LINE/L2, LINE/RTE-BovB, DNA/TcMar-Mariner and  
16  
17  
18 126 LINE/CR1. Among these, DNA/TcMar-Mariner was specifically expanded in *A. yamamai*  
19  
20 127 among 8 species and LINE/L2 element was commonly expanded in *A. yamamai* and *H.*  
21  
22  
23 128 *melpomene*.

## 30 130 **Gene prediction and annotation**

31  
32  
33  
34 131 Three different algorithms were used for gene prediction of *A. yamamai* genome: *ab initio*,  
35  
36 132 RNA-seq transcript and protein homology based. For *ab initio* gene prediction, Augustus[36],  
37  
38  
39 133 Geneid[37] and GeneMarks-ET[38] were employed. Augustus was trained using known genes  
40  
41 134 of *A. yamamai* in NCBI database and mapping information of RNA-seq data using Tophat[39]  
42  
43  
44 135 was also utilized for gene prediction. Geneid was used with the predefined parameter for  
45  
46 136 *Drosophila melanogaster*. GeneMarks-ET was employed with junction information of genes  
47  
48  
49 137 from transcriptome data alignment. For RNA-seq transcript based prediction, generated  
50  
51 138 transcriptome data from ten organ tissues of *A. yamamai* were aligned to the assembled genome  
52  
53  
54 139 using Tophat. Gene information were predicted using Cufflinks[40] and longest CDS  
55  
56 140 sequences were identified using Transdecoder. For homology-based approach, all known genes  
57  
58 141 of lepidoptera order in NCBI database were aligned using PASA[41]. Table 7 shows the gene  
59  
60  
61  
62  
63  
64  
65

1 142 prediction result from each method. Gene prediction results from different prediction  
2  
3 143 algorithms were combined using EVM (Evidence Modeler)[42] to build a consensus gene set  
4  
5  
6 144 for the *A. yamamai* genome. Final gene set of *A. yamamai* genome contains 21,124 genes and  
7  
8 145 summary statistics for the consensus gene set is provided in Table 8. To identify the function  
9  
10  
11 146 of predicted genes, Swiss-Prot[43], Uniref100[43], NCBI NR[44] database, and gene  
12  
13 147 information of *B. mori* and *D. melanogaster* genes were used for sequence similarity search  
14  
15  
16 148 using blastp. And we also conducted protein domain search using InterproScan5[45]. Figure  
17  
18 149 S1 shows top 20 identified terms in 10 analysis of InterproScan5. Based on gene ontology  
19  
20  
21 150 analysis, large proportion of genes in *A.yamamai* genome were related with molecule binding,  
22  
23 151 digestion and transport biological process.  
24  
25  
26  
27  
28  
29

## 30 153 **Demographic history and comparative genome analysis**

31  
32  
33

34 154 We estimated the demographic history of *A. yamamai* using the PSMC (pairwise sequentially  
35  
36 155 Markovian coalescent) method[46]. This method can infer the history of population size from  
37  
38  
39 156 a diploid sequence. 350bp paired-end reads were realigned to assembled genome using  
40  
41 157 Bowtie2 and consensus sequence data was generated from read alignment data using  
42  
43  
44 158 samtools[47] with parameters -d 10, -d 100. Bootstrap sampling was also executed 100 times.  
45  
46 159 For the resulting plots, generation time was set to 1 years based on the life cycle of *A. yamamai*.  
47  
48  
49 160 Figure 5a shows the inferred demographic history of *A. yamamai* using PSMC model. Based  
50  
51 161 on the PSMC analysis, the results suggest that population size of *A. yamamai* species  
52  
53  
54 162 consistently increased before the last glacial period (approximately 110,000 to 12,000 years  
55  
56 163 ago) same with most of insect population. During the last glacial period, population size had  
57  
58  
59 164 been continuously decreased. In Late Glacial Maximum Period (13,000 to 10,000 years ago),  
60  
61  
62  
63  
64  
65

1 165 which is also known as the beginning of the Modern Warm Period, population size of  
2  
3 166 *A.yamamai* didn't increase and stayed at its low level.  
4  
5

6 167 We used OrthoMCL[48] and RBH(Reciprocal Best Hit) using blastp for gene family group  
7  
8 168 analysis and 1:1 orthologous gene set identification, respectively. A total of 18,013 gene family  
9  
10 169 clusters was constructed and 3,586 1:1 orthologous genes were identified. Before conducting  
11  
12 170 comparative genome analysis, we constructed phylogenetic tree of 8 species. To build the  
13  
14 171 phylogenetic tree, multiple sequence alignment for 1:1 orthologous genes of 8 species was  
15  
16 172 conducted using PRANK[49] and Gblocks[50] was used to obtain the conserved blocks for  
17  
18 173 phylogenetic tree. Conserved block sequences were sequentially concatenated to one  
19  
20 174 consensus sequence for each species. MEGA6[51] was used for constructing Neighbor-Joining  
21  
22 175 Tree (bootstrap 1000, maximum composite likelihood, transitions + transversions, and gamma  
23  
24 176 distributed option) and MrBayes[52] was employed for Bayesian inference tree. To select the  
25  
26 177 best evolution model for our data, Modeltest[53] was conducted and GTR based invariant  
27  
28 178 model was chosen based on the AIC value of Modeltest. Gene family expansion and  
29  
30 179 contraction analysis was conducted using CAFE[54] based on the constructed phylogenetic  
31  
32 180 tree. Figure 5b shows the result of constructed phylogenetic tree and gene family analysis of 8  
33  
34 181 species. The number of expended and contracted genes of *A. yamamai* and *B. mori* indicated  
35  
36 182 that there was a difference genome evolution process between two silkworm species. Gene  
37  
38 183 ontology pathway analysis was conducted using gene annotation based on the *D. melanogaster*  
39  
40 184 (E-value < 1E-9) with ClueGO[55] and network of enriched pathways showed in Figure S2.  
41  
42 185 Function of expanded gene family was related to development and homeostasis function like  
43  
44 186 hormone metabolism, imaginal disc, digestion etc. Future study about related genes will help  
45  
46 187 to provide more insight into *A.yamamai* genome evolution.  
47  
48  
49  
50  
51  
52  
53  
54  
55  
56  
57  
58  
59 188  
60  
61  
62  
63  
64  
65

## 189 **Availability of supporting data**

190 Genome sequence and gene information of *A. yamamai* are available in GigaDB[56] and  
191 generated raw data is available in project accession PRJNA383008 and PRJNA383025 of  
192 NCBI database.

## 193 **Competing interests**

194 All authors report no competing interests.

## 195 **Authors contributions**

196  
197 Sampling - Kee-Young Kim, Su-Bae Kim

198 Sequencing - Kwang-Ho Choi, Seong-Wan Kim

199 Genome assembly - Seong-Ryul Kim, Woori Kwak, Jae-Sam Hwang, Seung-Won Park

200 Repeat element analysis - Seong-Ryul Kim, Woori Kwak, Seung-Won Park

201 Gene prediction - Seong-Ryul Kim, Woori Kwak, Jae-Sam Hwang

202 Comparative genome analysis - Seong-Ryul Kim, Woori Kwak

203 Funding and experimental design - Seong-Ryul Kim, Seung-Won Park

## 205 **Acknowledgements**

206 This work was supported by a grant from the Rural Development Administration, Republic of  
207 Korea (grant no. PJ010442).

## References

1. Peigler, R.S., *Wild silks of the world*. American Entomologist, 1993. **39**(3): p. 151-162.
2. Nakamura, S., et al., *Physical properties and structure of silk. XI. Glass transition temperature of wild silk fibroins*. Journal of applied polymer science, 1986. **31**(3): p. 955-956.
3. 松本陽一 and 斎藤英毅, *Load-extension characteristics of composite raw silk of *Antheraea yamamai* and *Bombyx mori**. 日本蚕糸学雑誌, 1997. **66**(6): p. 497-501.
4. Kweon, H. and Y. Park, *Structural characteristics and physical properties of wild silk fibres; *Antheraea pernyi* and *Antheraea yamamai**. Korean Journal of Sericultural Science (Korea Republic), 1994.
5. Zheng, Z., et al., *Preparation of regenerated *Antheraea yamamai* silk fibroin film and controlled-molecular conformation changes by aqueous ethanol treatment*. Journal of applied polymer science, 2010. **116**(1): p. 461-467.
6. Omenetto, F., et al., *Silk based biophotonic sensors*. 2011, Google Patents.
7. Takeda, S., *New field of insect science: Research on the use of insect properties*. Entomological Science, 2013. **16**(2): p. 125-135.
8. Omenetto, F. and D.L. Kaplan, *Silk-based multifunctional biomedical platform*. 2012, Google Patents.
9. Serban, M.A., *Silk medical devices*. 2016, Google Patents.
10. Jiang, G.-L., et al., *Drug delivery platforms comprising silk fibroin hydrogels and uses thereof*. 2010, Google Patents.
11. Kamiya, M., et al., *Structure-activity relationship of a novel pentapeptide with cancer cell growth-inhibitory activity*. Journal of Peptide Science, 2010. **16**(5): p. 242-248.
12. Bioinformatics, B., *FastQC A quality control tool for high throughput sequence data*. Cambridge, UK: Babraham Institute, 2011.
13. Bolger, A.M., M. Lohse, and B. Usadel, *Trimmomatic: a flexible trimmer for Illumina sequence data*. Bioinformatics, 2014: p. btu170.
14. Marçais, G. and C. Kingsford, *A fast, lock-free approach for efficient parallel counting of occurrences of k-mers*. Bioinformatics, 2011. **27**(6): p. 764-770.
15. You, M., et al., *A heterozygous moth genome provides insights into herbivory and detoxification*. Nature genetics, 2013. **45**(2): p. 220-225.
16. Gnerre, S., et al., *High-quality draft assemblies of mammalian genomes from massively parallel sequence data*. Proceedings of the National Academy of Sciences, 2011. **108**(4): p. 1513-1518.
17. Luo, R., et al., *SOAPdenovo2: an empirically improved memory-efficient short-read de novo assembler*. Gigascience, 2012. **1**(1): p. 18.
18. O'Connell, J., et al., *NxTrim: optimized trimming of Illumina mate pair reads*. Bioinformatics,



2015. **31**(12): p. 2035-2037.
19. Boetzer, M., et al., *Scaffolding pre-assembled contigs using SSPACE*. Bioinformatics, 2011. **27**(4): p. 578-579.
20. Boetzer, M. and W. Pirovano, *SSPACE-LongRead: scaffolding bacterial draft genomes using long read sequence information*. BMC bioinformatics, 2014. **15**(1): p. 211.
21. Voskoboinik, A., et al., *The genome sequence of the colonial chordate, Botryllus schlosseri*. Elife, 2013. **2**: p. e00569.
22. McCoy, R.C., et al., *Illumina TruSeq synthetic long-reads empower de novo assembly and resolve complex, highly-repetitive transposable elements*. PloS one, 2014. **9**(9): p. e106689.
23. Simão, F.A., et al., *BUSCO: assessing genome assembly and annotation completeness with single-copy orthologs*. Bioinformatics, 2015: p. btv351.
24. Bao, Z. and S.R. Eddy, *Automated de novo identification of repeat sequence families in sequenced genomes*. Genome research, 2002. **12**(8): p. 1269-1276.
25. Price, A.L., N.C. Jones, and P.A. Pevzner, *De novo identification of repeat families in large genomes*. Bioinformatics, 2005. **21**(suppl 1): p. i351-i358.
26. Benson, G., *Tandem repeats finder: a program to analyze DNA sequences*. Nucleic acids research, 1999. **27**(2): p. 573-580.
27. Kohany, O., et al., *Annotation, submission and screening of repetitive elements in Repbase: RepbaseSubmitter and Censor*. BMC bioinformatics, 2006. **7**(1): p. 474.
28. Tarailo-Graovac, M. and N. Chen, *Using RepeatMasker to identify repetitive elements in genomic sequences*. Current Protocols in Bioinformatics, 2009: p. 4.10. 1-4.10. 14.
29. Bao, W., K.K. Kojima, and O. Kohany, *Repbase Update, a database of repetitive elements in eukaryotic genomes*. Mobile DNA, 2015. **6**(1): p. 11.
30. Nene, V., et al., *Genome sequence of Aedes aegypti, a major arbovirus vector*. Science, 2007. **316**(5832): p. 1718-1723.
31. Xia, Q., et al., *A draft sequence for the genome of the domesticated silkworm (Bombyx mori)*. Science, 2004. **306**(5703): p. 1937-1940.
32. Zhan, S., et al., *The monarch butterfly genome yields insights into long-distance migration*. Cell, 2011. **147**(5): p. 1171-1185.
33. Adams, M.D., et al., *The genome sequence of Drosophila melanogaster*. Science, 2000. **287**(5461): p. 2185-2195.
34. Consortium, H.G., *Butterfly genome reveals promiscuous exchange of mimicry adaptations among species*. Nature, 2012. **487**(7405): p. 94-98.
35. Ahola, V., et al., *The Glanville fritillary genome retains an ancient karyotype and reveals selective chromosomal fusions in Lepidoptera*. Nature communications, 2014. **5**.
36. Stanke, M., et al., *Using native and syntenically mapped cDNA alignments to improve de novo gene finding*. Bioinformatics, 2008. **24**(5): p. 637-644.
37. Blanco, E., G. Parra, and R. Guigó, *Using geneid to identify genes*. Current protocols in bioinformatics, 2007: p. 4.3. 1-4.3. 28.

- 1 38. Lomsadze, A., P.D. Burns, and M. Borodovsky, *Integration of mapped RNA-Seq reads into*  
2 *automatic training of eukaryotic gene finding algorithm*. Nucleic acids research, 2014: p.  
3 gku557.
- 4  
5 39. Trapnell, C., L. Pachter, and S.L. Salzberg, *TopHat: discovering splice junctions with RNA-*  
6 *Seq*. Bioinformatics, 2009. **25**(9): p. 1105-1111.
- 7  
8 40. Trapnell, C., et al., *Differential gene and transcript expression analysis of RNA-seq*  
9 *experiments with TopHat and Cufflinks*. Nature protocols, 2012. **7**(3): p. 562-578.
- 10  
11 41. Campbell, M.A., et al., *Comprehensive analysis of alternative splicing in rice and*  
12 *comparative analyses with Arabidopsis*. BMC genomics, 2006. **7**(1): p. 327.
- 13  
14 42. Haas, B.J., et al., *Automated eukaryotic gene structure annotation using EVIDENCEModeler*  
15 *and the Program to Assemble Spliced Alignments*. Genome biology, 2008. **9**(1): p. R7.
- 16  
17 43. Consortium, U., *Reorganizing the protein space at the Universal Protein Resource*  
18 *(UniProt)*. Nucleic acids research, 2011: p. gkr981.
- 19  
20 44. Pruitt, K.D., T. Tatusova, and D.R. Maglott, *NCBI reference sequences (RefSeq): a curated*  
21 *non-redundant sequence database of genomes, transcripts and proteins*. Nucleic acids  
22 research, 2007. **35**(suppl 1): p. D61-D65.
- 23  
24 45. Jones, P., et al., *InterProScan 5: genome-scale protein function classification*. Bioinformatics,  
25 2014. **30**(9): p. 1236-1240.
- 26  
27 46. Li, H. and R. Durbin, *Inference of human population history from individual whole-genome*  
28 *sequences*. Nature, 2011. **475**(7357): p. 493-496.
- 29  
30 47. Li, H., et al., *The sequence alignment/map format and SAMtools*. Bioinformatics, 2009.  
31 **25**(16): p. 2078-2079.
- 32  
33 48. Li, L., C.J. Stoeckert, and D.S. Roos, *OrthoMCL: identification of ortholog groups for*  
34 *eukaryotic genomes*. Genome research, 2003. **13**(9): p. 2178-2189.
- 35  
36 49. Löytynoja, A. and N. Goldman, *An algorithm for progressive multiple alignment of*  
37 *sequences with insertions*. Proceedings of the National Academy of Sciences of the United  
38 States of America, 2005. **102**(30): p. 10557.
- 39  
40 50. Castresana, J., *Selection of conserved blocks from multiple alignments for their use in*  
41 *phylogenetic analysis*. Molecular biology and evolution, 2000. **17**(4): p. 540-552.
- 42  
43 51. Tamura, K., et al., *MEGA6: molecular evolutionary genetics analysis version 6.0*. Molecular  
44 biology and evolution, 2013: p. mst197.
- 45  
46 52. Ronquist, F. and J.P. Huelsenbeck, *MrBayes 3: Bayesian phylogenetic inference under mixed*  
47 *models*. Bioinformatics, 2003. **19**(12): p. 1572-1574.
- 48  
49 53. Posada, D., *Using MODELTEST and PAUP\* to select a model of nucleotide substitution*.  
50 Current protocols in bioinformatics, 2003: p. 6.5. 1-6.5. 14.
- 51  
52 54. De Bie, T., et al., *CAFE: a computational tool for the study of gene family evolution*.  
53 Bioinformatics, 2006. **22**(10): p. 1269-1271.
- 54  
55 55. Bindea, G., et al., *ClueGO: a Cytoscape plug-in to decipher functionally grouped gene*  
56 *ontology and pathway annotation networks*. Bioinformatics, 2009. **25**(8): p. 1091-1093.
- 57  
58  
59  
60  
61  
62  
63  
64  
65

1  
2  
3  
4  
5  
6  
7  
8  
9  
10  
11  
12  
13  
14  
15  
16  
17  
18  
19  
20  
21  
22  
23  
24  
25  
26  
27  
28  
29  
30  
31  
32  
33  
34  
35  
36  
37  
38  
39  
40  
41  
42  
43  
44  
45  
46  
47  
48  
49  
50  
51  
52  
53  
54  
55  
56  
57  
58  
59  
60  
61  
62  
63  
64  
65

56. Sneddon, T.P., P. Li, and S.C. Edmunds, *GigaDB: announcing the GigaScience database*. GigaScience, 2012. **1**(1): p. 11.

16  
17  
18  
19  
20  
21  
22  
23  
24  
25  
26  
27  
28  
29  
30  
31  
32  
33  
34  
35  
36  
37  
38  
39  
40  
41  
42  
43  
44  
45  
46  
47  
48  
49  
50  
51  
52  
53  
54  
55  
56  
57  
58  
59  
60  
61  
62  
63  
64  
65

## Tables

Table 1. Summary statistics of generated whole genome shotgun sequencing data using Illumina Nextseq 500.

| Library Name | Library Type | Insert Size | Platform   | Read Length | No. Read    | Total bp        |
|--------------|--------------|-------------|------------|-------------|-------------|-----------------|
| 350bp        | Paired-end   | 350bp       | Nextseq500 | 151         | 293,176,268 | 44,269,616,468  |
| 700bp        | Paired-end   | 700bp       | Nextseq500 | 151         | 246,945,900 | 37,288,830,900  |
| 3Kbp         | Mate-pair    | 3Kbp        | Nextseq500 | 76          | 284,204,762 | 21,599,561,912  |
| 6Kbp         | Mate-pair    | 6Kbp        | Nextseq500 | 76          | 246,238,370 | 18,714,116,120  |
| 9Kbp         | Mate-pair    | 9Kbp        | Nextseq500 | 76          | 239,919,538 | 18,233,884,888  |
| <b>Total</b> |              |             |            |             |             | 140,106,010,288 |

1 Table 2. Summary statistics for Illumina synthetic long read (Moleculo) library.  
2  
3

|                                      | 500-1499bp  | >= 1500bp     |
|--------------------------------------|-------------|---------------|
| 7 Number of assembled read           | 302,132     | 342,738       |
| 11 Number of bases in assembled read | 268,853,717 | 1,205,349,082 |
| 14 N50 length of assembled read      | 960         | 4,031         |

4  
5  
6  
8  
9  
10  
12  
13  
15  
16  
17  
18  
19  
20  
21  
22  
23  
24  
25  
26  
27  
28  
29  
30  
31  
32  
33  
34  
35  
36  
37  
38  
39  
40  
41  
42  
43  
44  
45  
46  
47  
48  
49  
50  
51  
52  
53  
54  
55  
56  
57  
58  
59  
60  
61  
62  
63  
64  
65

1 Table 3. Summary statistics for generated long reads data using Pacbio RS II system.  
2

---

|    |                                   |               |
|----|-----------------------------------|---------------|
| 3  |                                   |               |
| 4  | Number of Reads                   | 1,005,571     |
| 5  |                                   |               |
| 6  |                                   |               |
| 7  | Total Bases                       | 5,836,969,225 |
| 8  |                                   |               |
| 9  |                                   |               |
| 10 |                                   |               |
| 11 | Length of longest (shortest) read | 50,132(50)    |
| 12 |                                   |               |
| 13 |                                   |               |
| 14 |                                   |               |
| 15 | Average read length               | 5,804.63      |
| 16 |                                   |               |
| 17 |                                   |               |

---

18  
19  
20  
21  
22  
23  
24  
25  
26  
27  
28  
29  
30  
31  
32  
33  
34  
35  
36  
37  
38  
39  
40  
41  
42  
43  
44  
45  
46  
47  
48  
49  
50  
51  
52  
53  
54  
55  
56  
57  
58  
59  
60  
61  
62  
63  
64  
65

Table 4. Summary statistics of generated transcriptome data for six organ tissues using Illumina platform.

| Tissue        | Sample Name     | Read Length | Read Count | Total Base (bp) |
|---------------|-----------------|-------------|------------|-----------------|
| Hemocyte      | Hemocyte_1      | 76          | 20,815,674 | 1,581,991,224   |
|               | Hemocyte_2      | 76          | 26,704,666 | 2,029,554,616   |
|               | Hemocyte_2      | 76          | 53,068,562 | 4,033,210,712   |
| Malpighi      | Malpighi_1      | 76          | 22,635,428 | 1,720,292,528   |
|               | Malpighi_2      | 76          | 24,893,788 | 1,891,927,888   |
|               | Malpighi_3      | 76          | 45,213,164 | 3,436,200,464   |
| Midgut        | Midgut_1        | 76          | 23,350,138 | 1,774,610,488   |
|               | Midgut_2        | 76          | 24,597,972 | 1,869,445,872   |
|               | Midgut_3        | 76          | 50,949,986 | 3,872,198,936   |
| Head          | Head_1          | 76          | 26,526,276 | 2,015,996,976   |
|               | Head_2          | 76          | 26,581,124 | 2,020,165,424   |
|               | Head_3          | 76          | 40,900,456 | 3,108,434,656   |
| Skin          | Skin_1          | 76          | 24,592,846 | 1,869,056,296   |
|               | Skin_2          | 76          | 42,775,430 | 3,250,932,680   |
|               | Skin_3          | 76          | 35,043,570 | 2,663,311,320   |
| Fat Body      | Fat Body_1      | 76          | 24,637,810 | 1,872,473,560   |
|               | Fat Body_2      | 76          | 24,037,494 | 1,826,849,544   |
|               | Fat Body_3      | 76          | 40,817,582 | 3,102,136,232   |
| AM/Silk Gland | AM/Silk Gland_1 | 76          | 21,399,638 | 1,626,372,488   |
|               | AM/Silk Gland_2 | 76          | 24,292,386 | 1,846,221,336   |
|               | AM/Silk Gland_3 | 76          | 37,331,530 | 2,837,196,280   |
| P/Silk Gland  | P/Silk Gland_1  | 76          | 27,359,580 | 2,079,328,080   |
|               | P/Silk Gland_2  | 76          | 23,300,962 | 1,770,873,112   |
|               | P/Silk Gland_3  | 76          | 39,421,430 | 2,996,028,680   |
| Testis        | Testis_1        | 76          | 40,890,404 | 3,107,670,704   |
|               | Testis_2        | 76          | 45,733,846 | 3,475,772,296   |
|               | Testis_3        | 76          | 44,985,224 | 3,418,877,024   |
| Ovary         | Ovary_1         | 76          | 40,797,628 | 3,100,619,728   |
|               | Ovary_2         | 76          | 40,409,752 | 3,071,141,152   |
|               | Ovary_3         | 76          | 42,417,892 | 3,223,759,792   |

1 Table 5. Summary statistics for the *A. yamamai* genome (>2kb).  
2  
3

---

4 **Assembled Genome**

---

|                                     |                   |
|-------------------------------------|-------------------|
| 6 Size(1n)                          | 656 Mb            |
| 8 GC level                          | 34.07             |
| 10 No. scaffolds                    | 3,675             |
| 12 N50 of scaffolds (bp)            | 739,388           |
| 14 N bases in scaffolds (%)         | 19,257,439 (2.93) |
| 16 Longest(shortest) scaffolds (bp) | 3,156,949 (2,003) |
| 18 Average scaffold Length (bp)     | 178,657.53        |

---

21  
22  
23  
24  
25  
26  
27  
28  
29  
30  
31  
32  
33  
34  
35  
36  
37  
38  
39  
40  
41  
42  
43  
44  
45  
46  
47  
48  
49  
50  
51  
52  
53  
54  
55  
56  
57  
58  
59  
60  
61  
62  
63  
64  
65



Table 6. Summary of identified repeat elements in the *A. yamamai* genome.

| Repeat Element | No. Element | Length (%)         |
|----------------|-------------|--------------------|
| SINE           | 59,968      | 8,615,338(1.30)    |
| LINE           | 426,522     | 101,251,176(15.31) |
| LTR element    | 53,977      | 4,552,386(0.69)    |
| DNA element    | 512,760     | 69,071,227(10.44)  |
| Small RNA      | 43,645      | 6,691,619(1.01)    |
| Simple repeat  | 135,989     | 6,256,839(0.95)    |
| Low complexity | 19,937      | 932,829(0.14)      |
| Unclassified   | 294,190     | 54,552,009(8.25)   |

1  
2  
3  
4  
5  
6  
7  
8  
9  
10  
11  
12  
13  
14  
15  
16  
17  
18  
19  
20  
21  
22  
23  
24  
25  
26  
27  
28  
29  
30  
31  
32  
33  
34  
35  
36  
37  
38  
39  
40  
41  
42  
43  
44  
45  
46  
47  
48  
49  
50  
51  
52  
53  
54  
55  
56  
57  
58  
59  
60  
61  
62  
63  
64  
65

16  
17  
18  
19  
20  
21  
22  
23  
24  
25  
26  
27  
28  
29  
30  
31  
32  
33  
34  
35  
36  
37  
38  
39  
40  
41  
42  
43  
44  
45  
46  
47  
48  
49  
50  
51  
52  
53  
54  
55  
56  
57  
58  
59  
60  
61  
62  
63  
64  
65

Table 7. Summary statistics for ab initio, RNA-seq based and homology based gene prediction results.

| Evidence Type                | Programs       | Element                   | Total count | Exon/Gene | Total length(bp) | Mean length(bp) |            |
|------------------------------|----------------|---------------------------|-------------|-----------|------------------|-----------------|------------|
| <i>ab_initio</i>             | Augustus       | Gene                      | 14,576      | 4.85      | 142,415,318      | 9,770.53        |            |
|                              |                | Exon                      | 70,733      |           |                  |                 | 14,736,668 |
|                              | Geneid         | Gene                      | 10,946      | 2.25      | 46,119,402       | 4,213.35        |            |
|                              |                | Exon                      | 24,686      |           |                  |                 | 3,925,563  |
|                              | GeneMarks-ET   |                           | Gene        | 27,754    | 5.50             | 273,745,951     | 9,863.29   |
|                              |                |                           | Exon        | 152,660   |                  |                 |            |
|                              | RNA-seq        | Cufflinks<br>Transdecoder | Gene        | 36,213    | 7.03             | 840,429,061     | 23,207.94  |
|                              |                |                           | Exon        | 254,770   |                  |                 |            |
| Known Gene<br>(NCBI lepidop) | PASA<br>(gmap) |                           | 44,561      |           | 22,484,151       | 504.57          |            |

15  
16  
17  
18  
19  
20  
21  
22  
23  
24  
25  
26  
27  
28  
29  
30  
31  
32  
33  
34  
35  
36  
37  
38  
39  
40  
41  
42  
43  
44  
45  
46  
47  
48  
49  
50  
51  
52  
53  
54  
55  
56  
57  
58  
59  
60  
61  
62  
63  
64  
65

Table 8. Summary statistics for the consensus gene set of *A. yamamai* genome.

---

| Element | No. elements | Exon/Gene | Avg. length | Total length | Genome coverage |
|---------|--------------|-----------|-------------|--------------|-----------------|
| Gene    | 21,124       |           | 8,331.63    | 175,997,473  | 26.61           |
|         |              | 4.44      |             |              |                 |
| Exon    | 93,950       |           | 236.53      | 22,222,354   | 3.35            |

---

16  
17  
18  
19  
20  
21  
22  
23  
24  
25  
26  
27  
28  
29  
30  
31  
32  
33  
34  
35  
36  
37  
38  
39  
40  
41  
42  
43  
44  
45  
46  
47  
48  
49  
50  
51  
52  
53  
54  
55  
56  
57  
58  
59  
60  
61  
62  
63  
64  
65

## Figures

Figure 1. Photograph of *Antheraea Yamamai*. From left, larva, cocoon and adult *A. yamamai*, respectively. Specific green color is one representative characteristics of tensan silk.

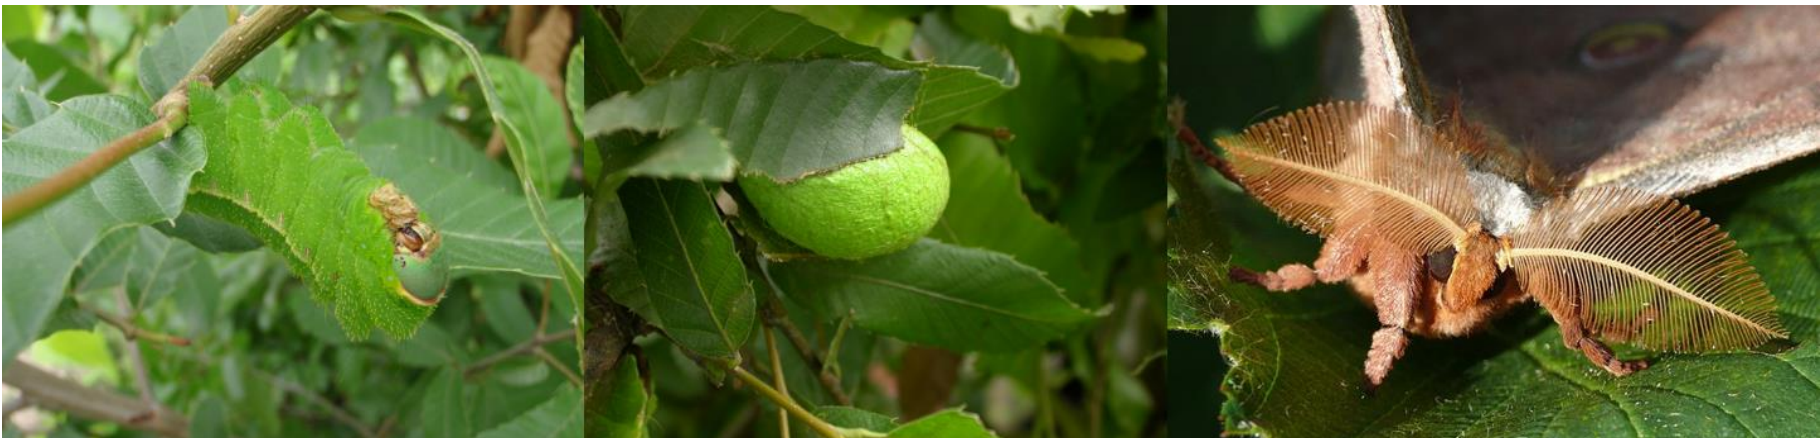

Figure 2. Karyotype of *A.yamamai* using a gamete of testis in metaphase.

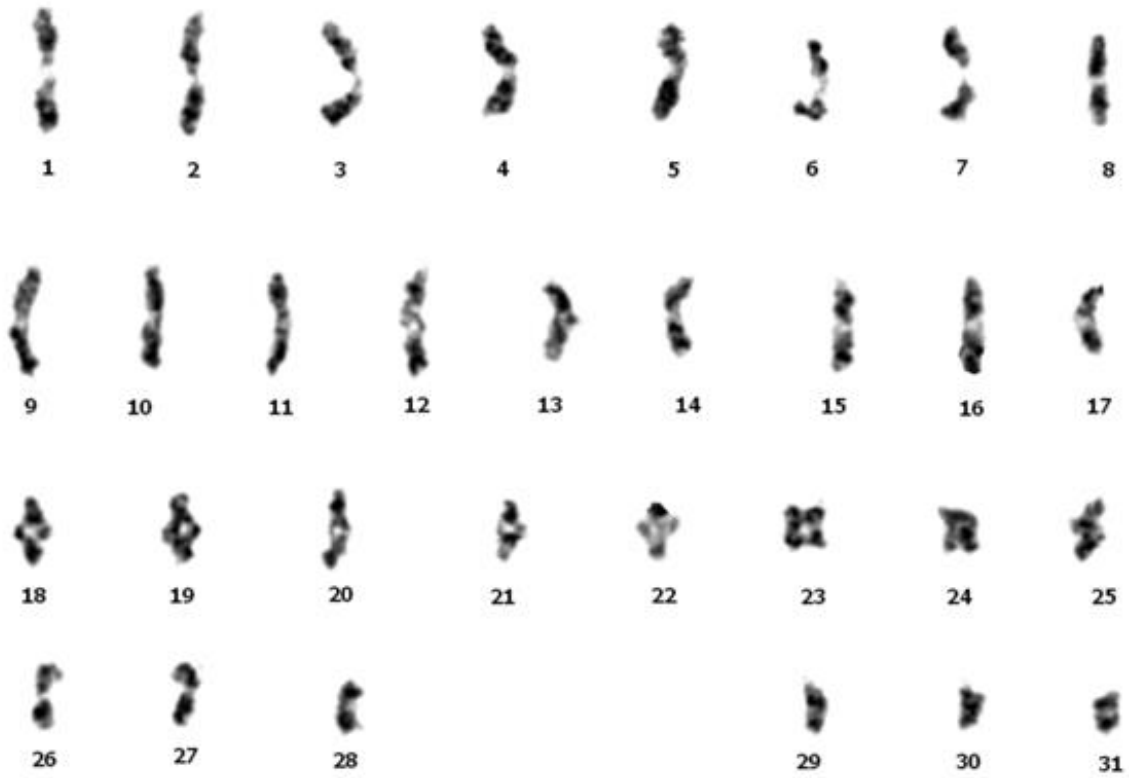

1  
2  
3  
4  
5  
6  
7  
8  
9  
10  
11  
12  
13  
14  
15  
16  
17  
18  
19  
20  
21  
22  
23  
24  
25  
26  
27  
28  
29  
30  
31  
32  
33  
34  
35  
36  
37  
38  
39  
40  
41  
42  
43  
44  
45  
46  
47  
48  
49  
50  
51  
52  
53  
54  
55  
56  
57  
58  
59  
60  
61  
62  
63  
64  
65

1 Figure 3. 19-mer distribution of *A. yamamai* genome using jellyfish with 350bp paired-end  
2  
3 whole genome sequencing data.  
4  
5  
6  
7

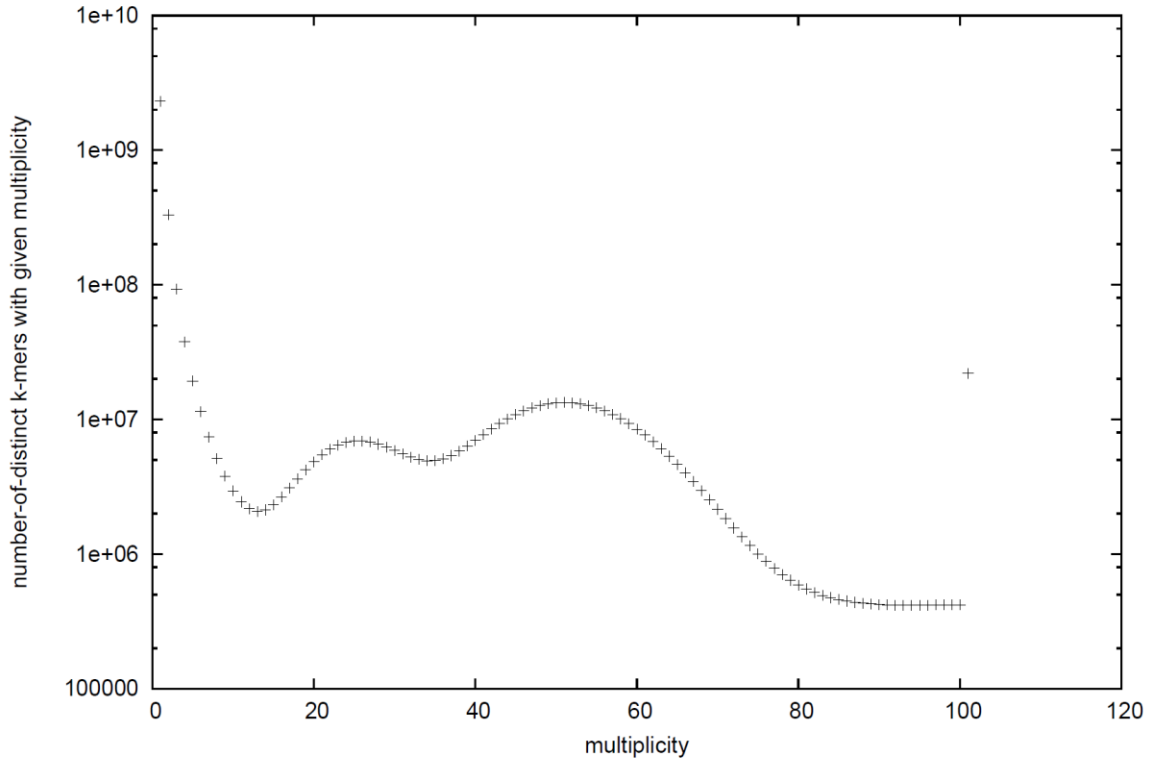

1 Figure 4. Amount and proportion of identified repeat element from 8 species including *A.*  
 2 *yamamai*. a. Absolute amount of repeat element classified into 8 different categories. b.  
 3  
 4  
 5  
 6 Proportion of each repeat element in identified total repeat element.  
 7  
 8  
 9  
 10  
 11  
 12  
 13  
 14  
 15  
 16  
 17  
 18  
 19  
 20  
 21  
 22  
 23  
 24  
 25  
 26  
 27  
 28  
 29  
 30  
 31  
 32  
 33  
 34  
 35  
 36  
 37  
 38  
 39  
 40  
 41  
 42  
 43  
 44  
 45  
 46  
 47  
 48  
 49  
 50  
 51  
 52  
 53  
 54  
 55  
 56  
 57  
 58  
 59  
 60  
 61  
 62  
 63  
 64  
 65

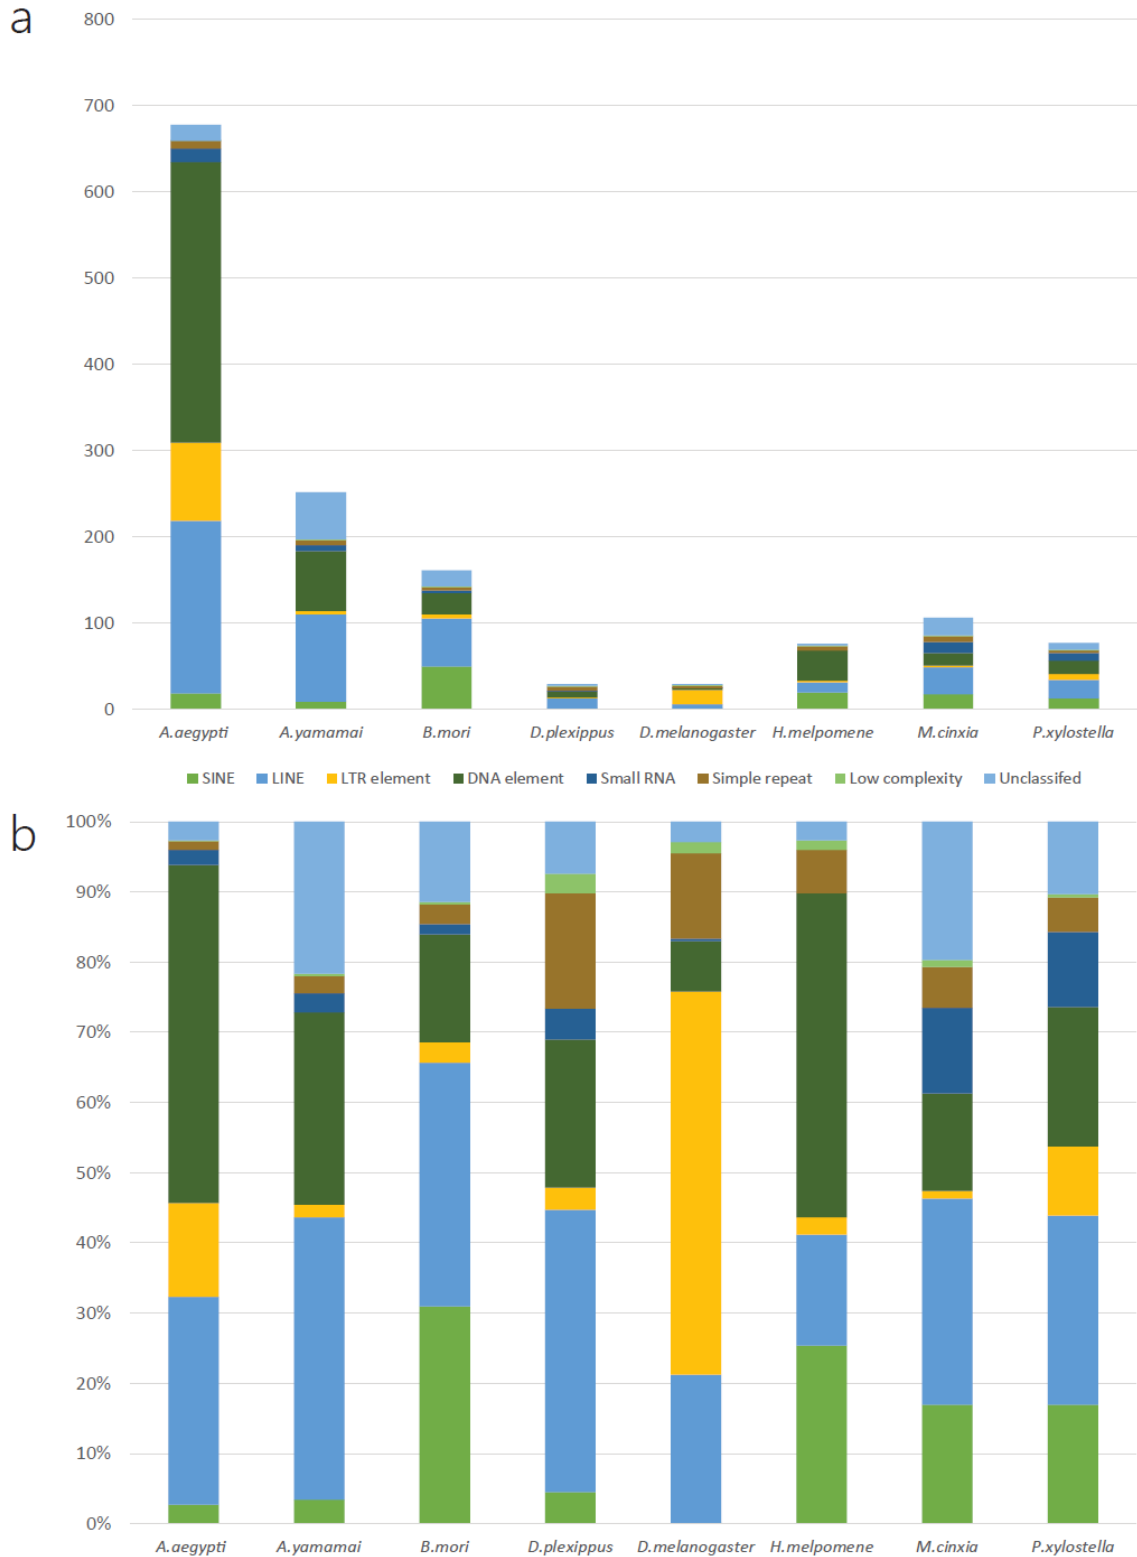

Figure 5. Demographic history of *A. yamamai* using PSMC and comparative gene family analysis. Node value indicate Bayesian posterior probability, bootstrap and gene expansion, contraction value. Orange and blue color indicate expansion and contraction, respectively.

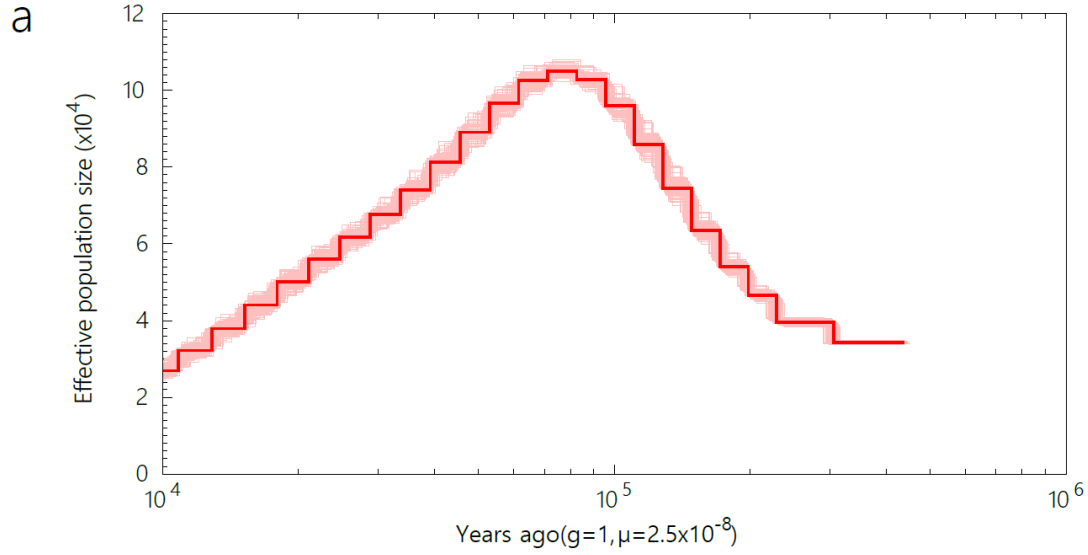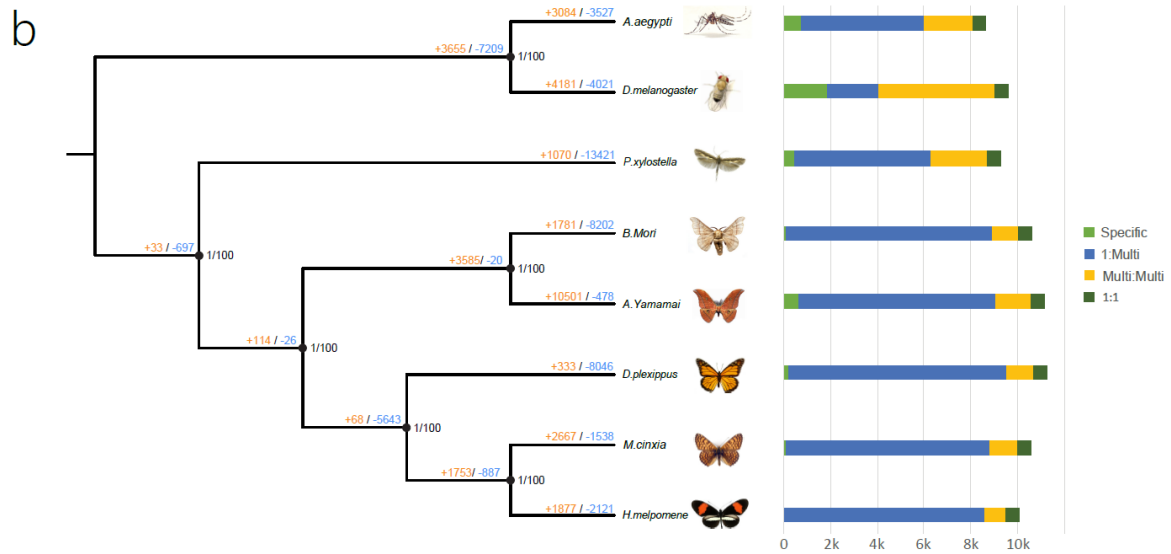



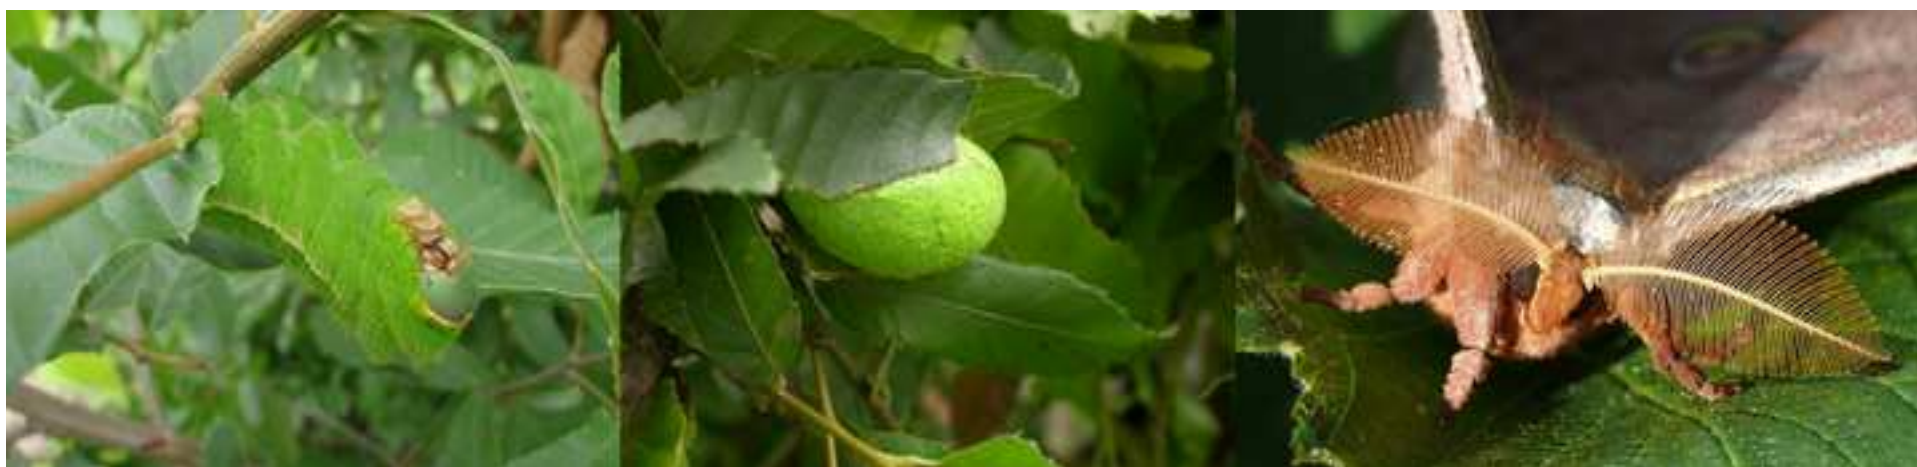

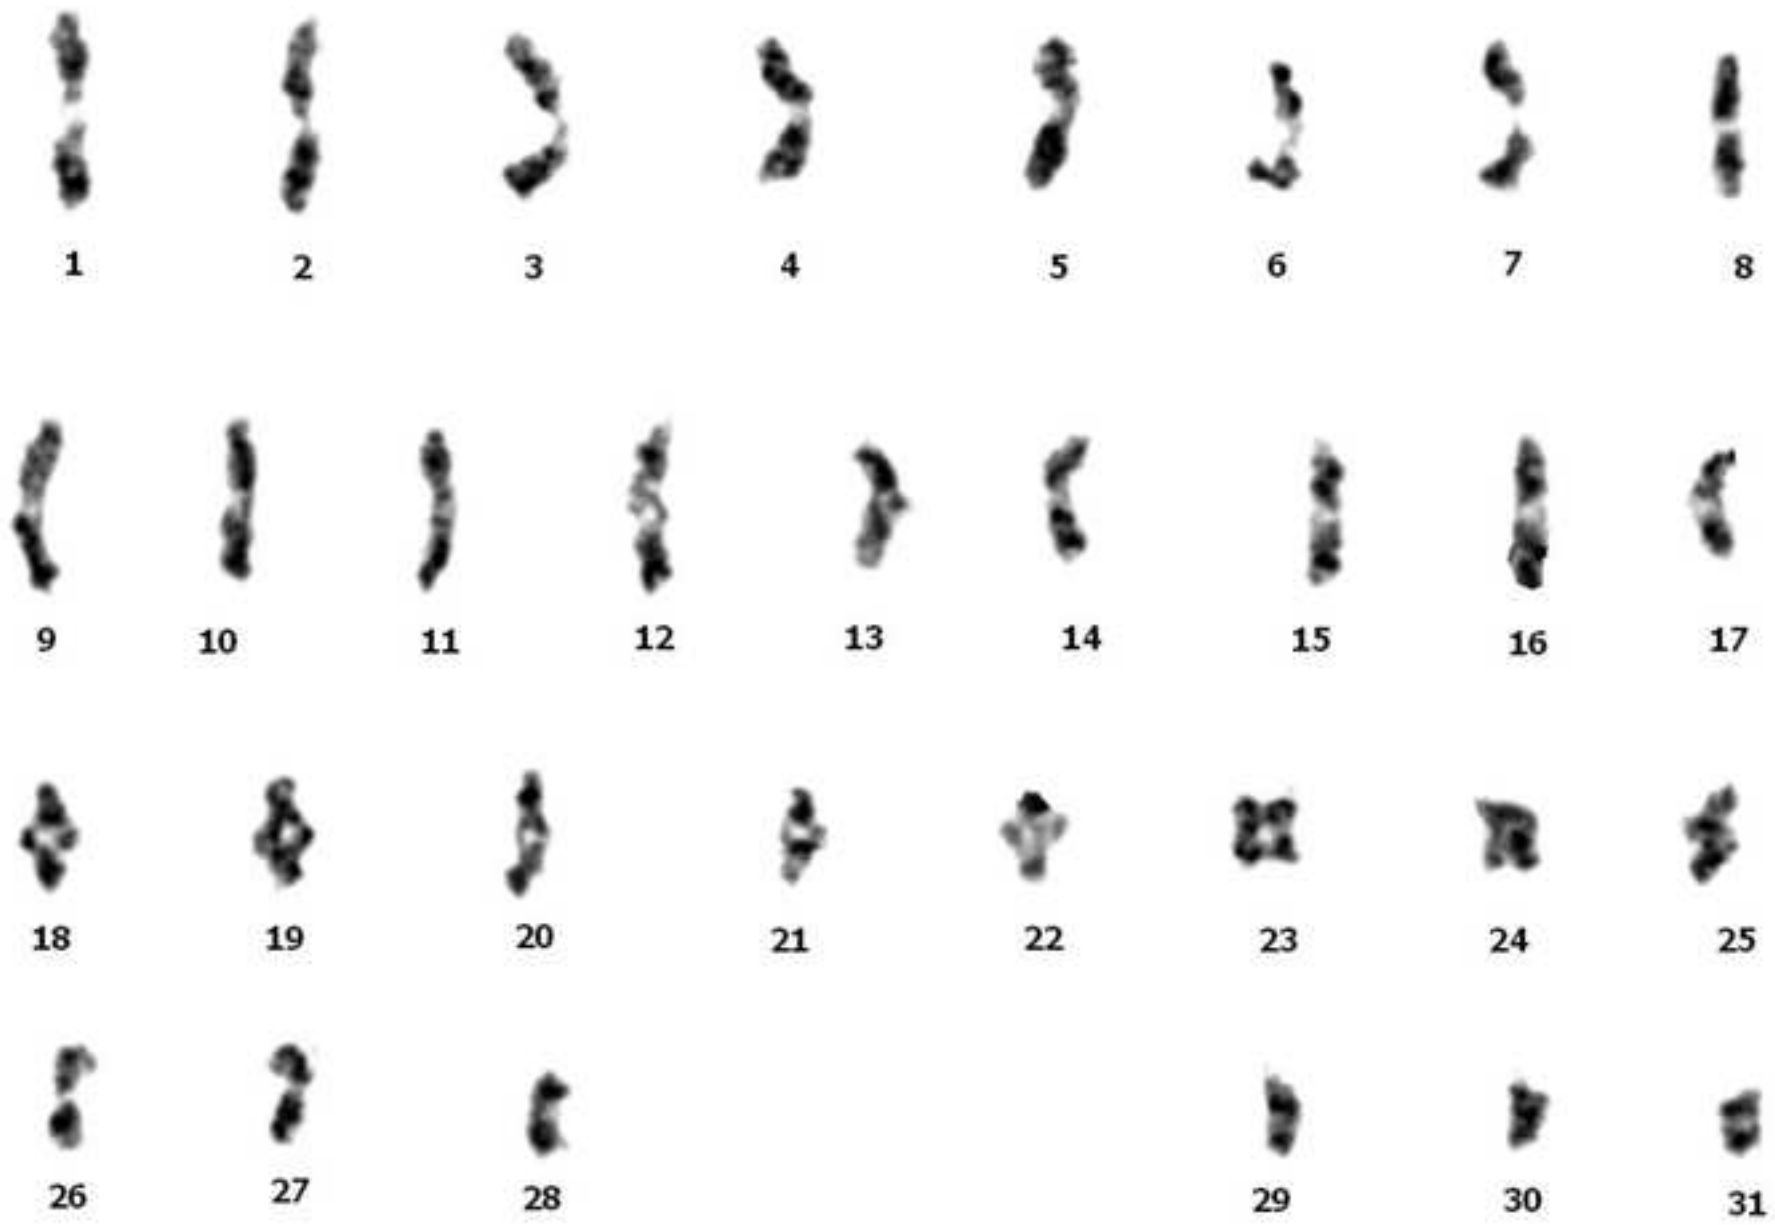

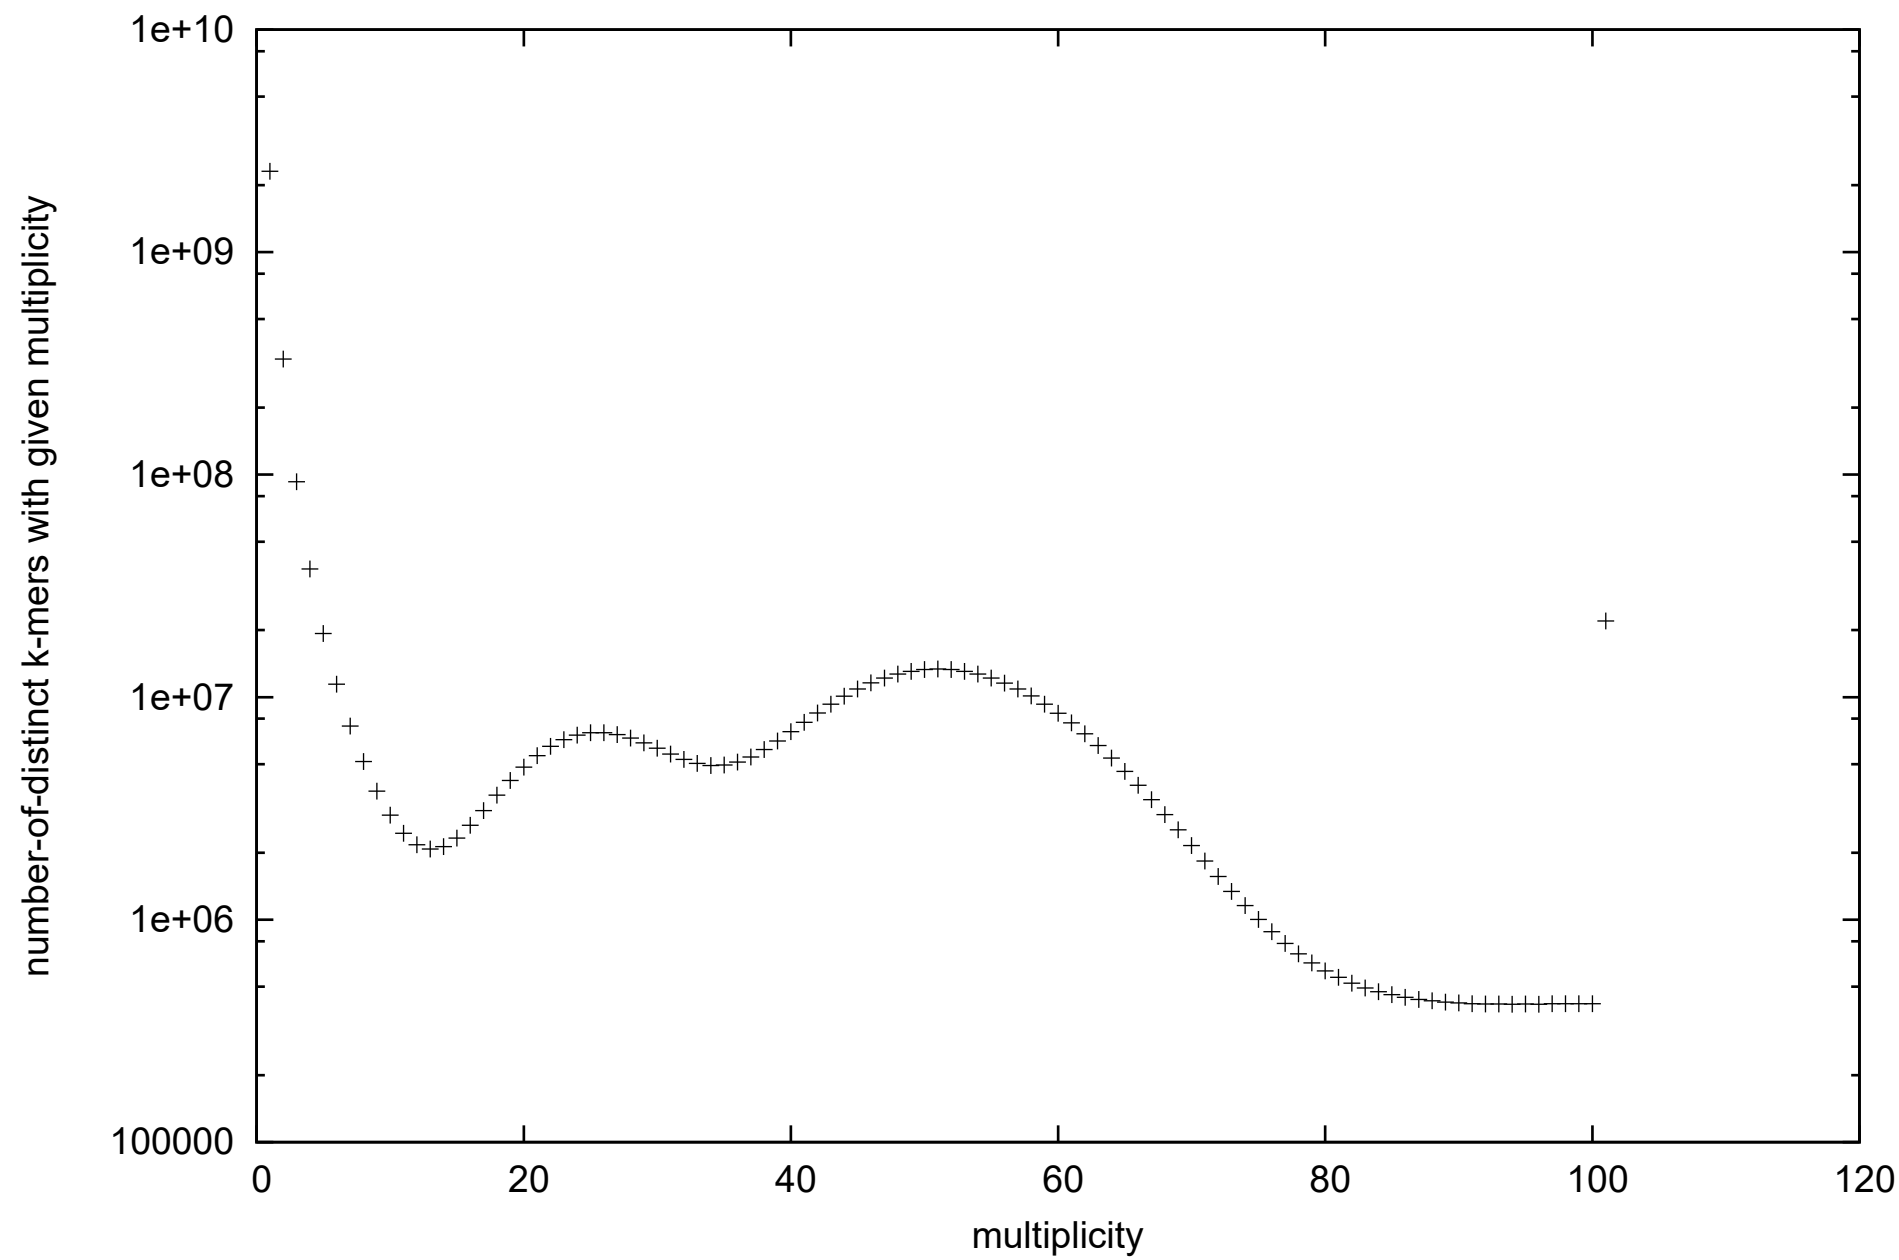

Figure a

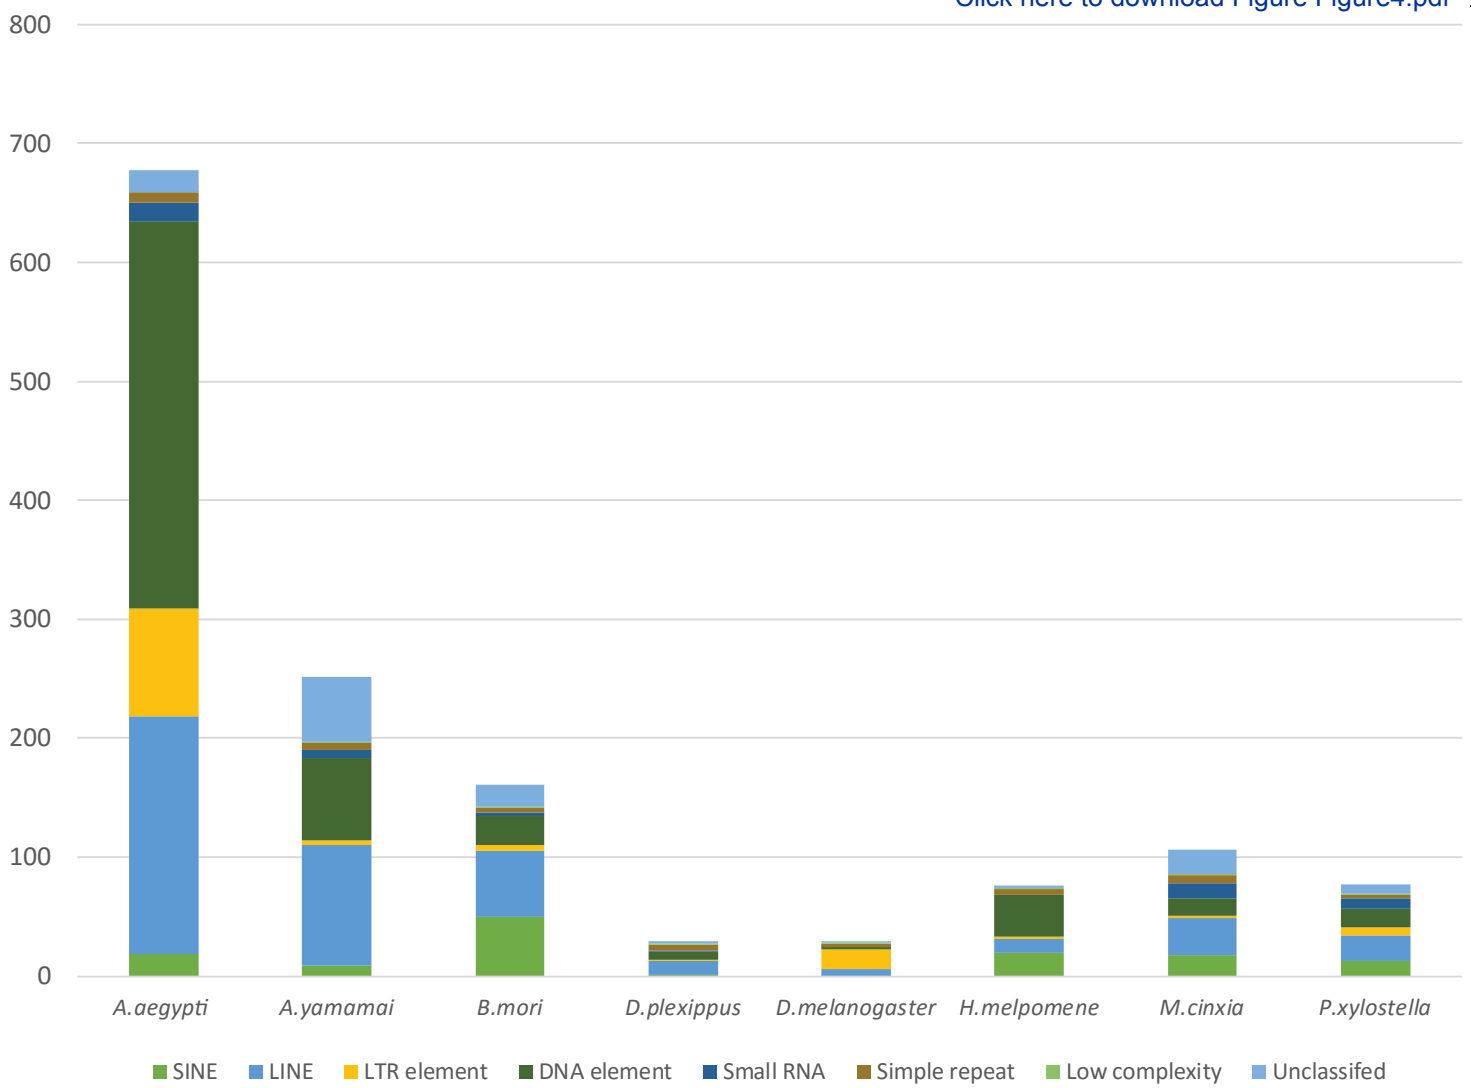

b

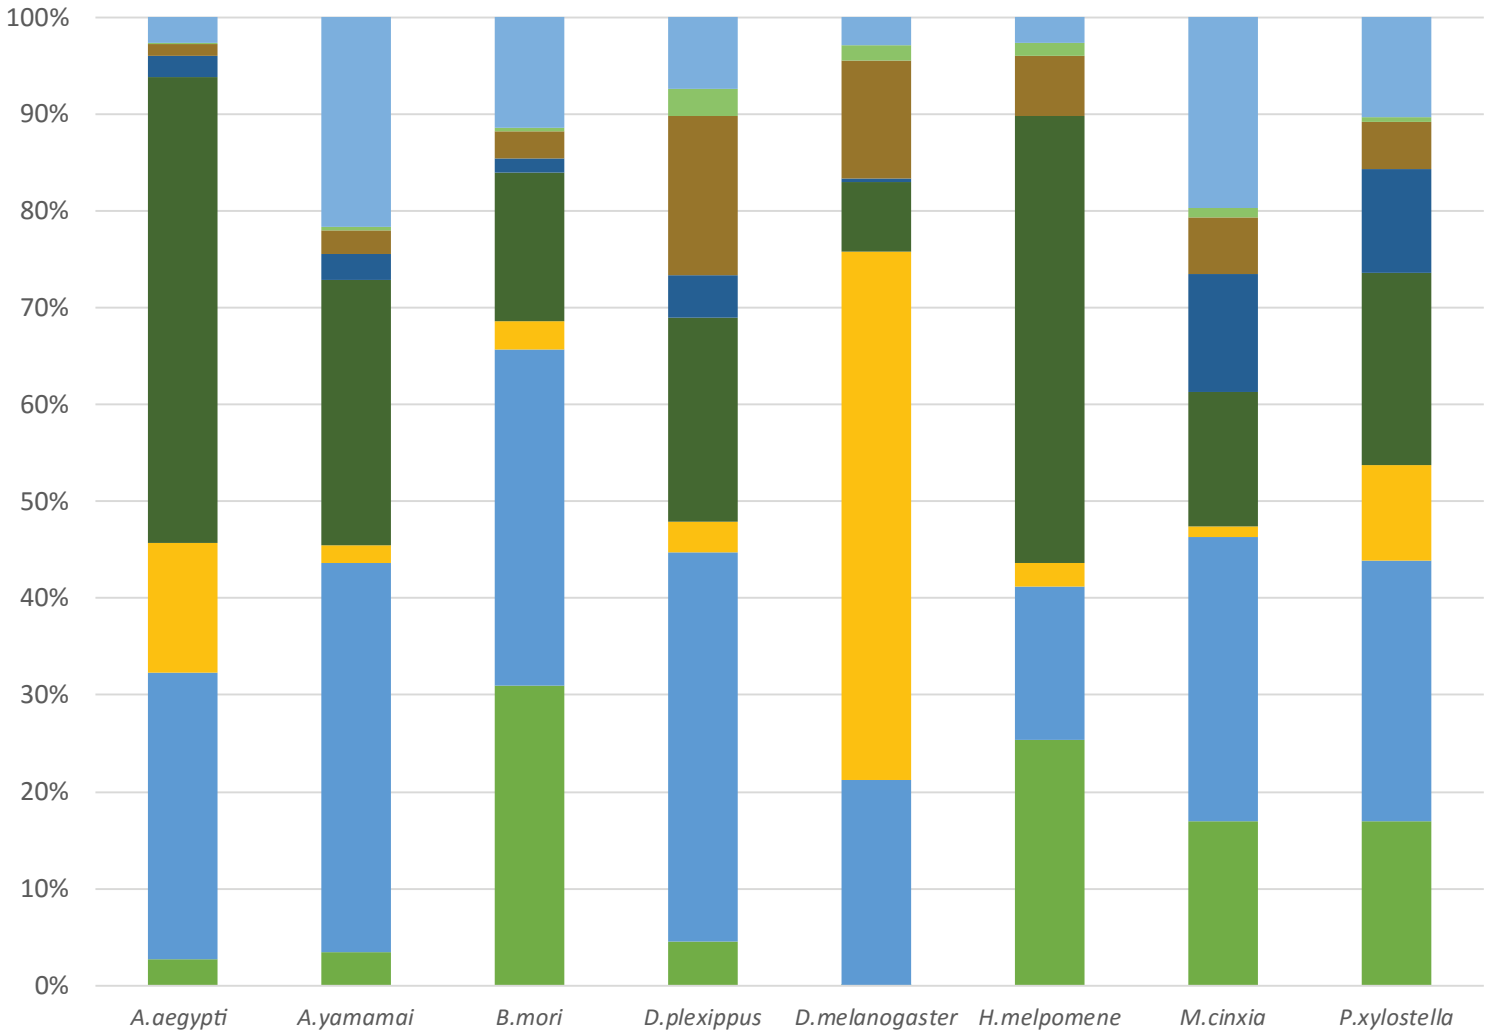

a

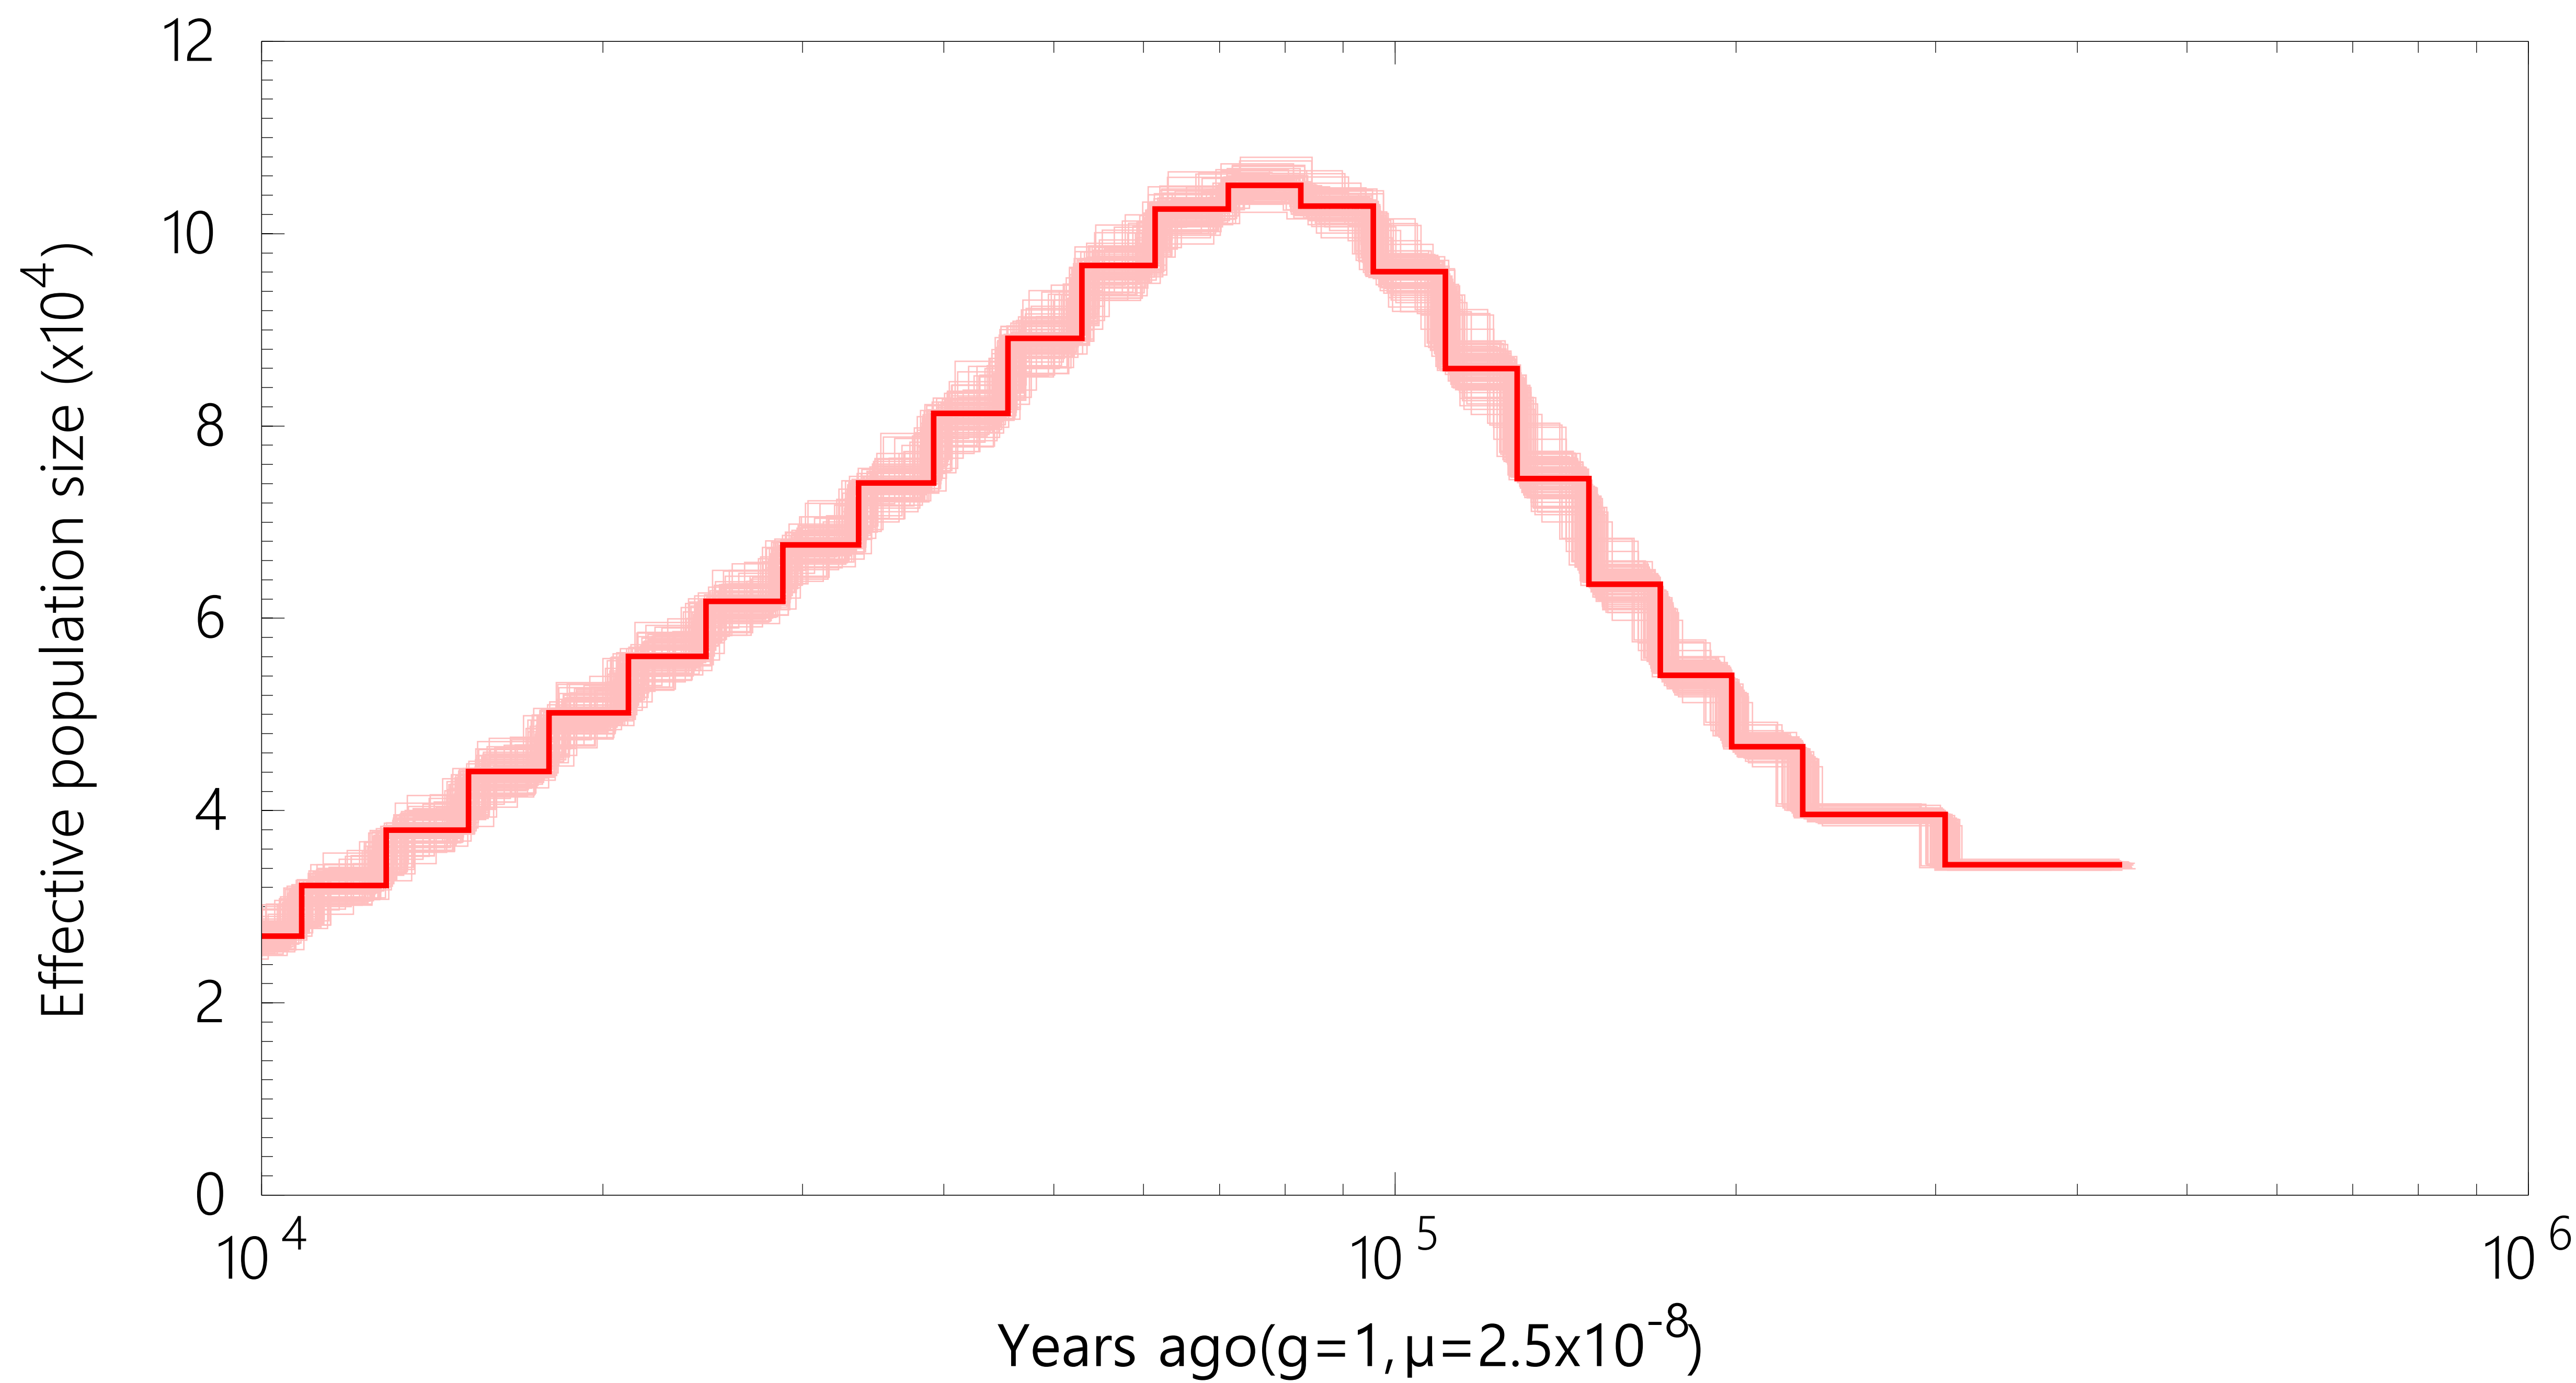

b

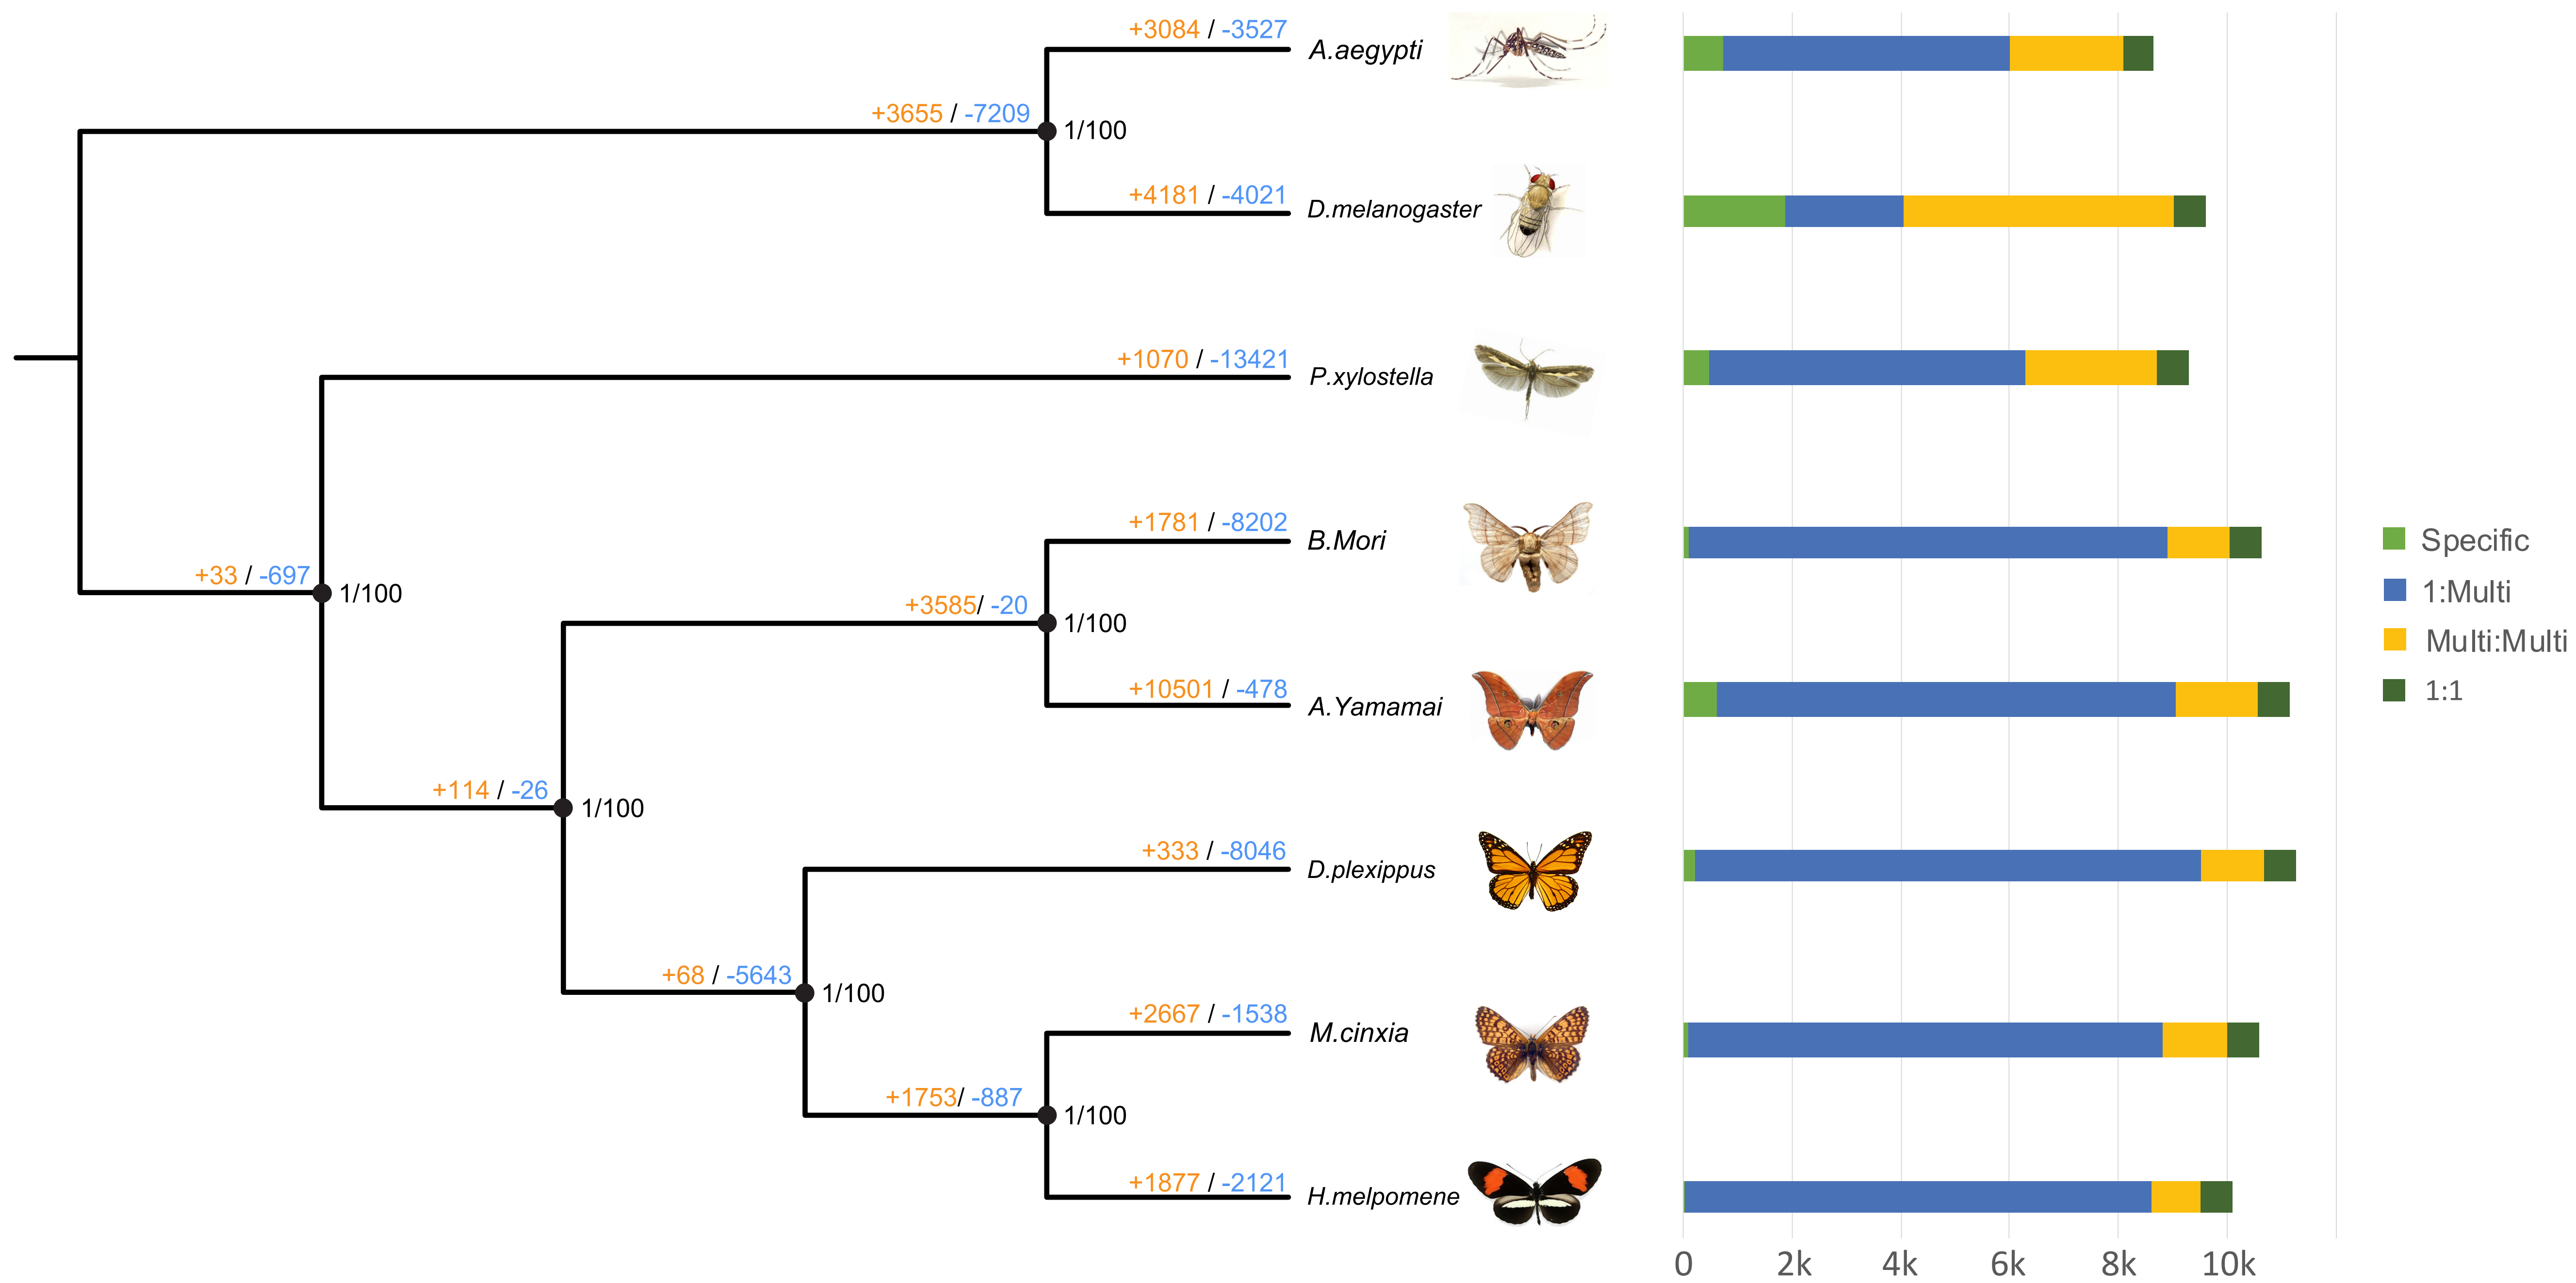

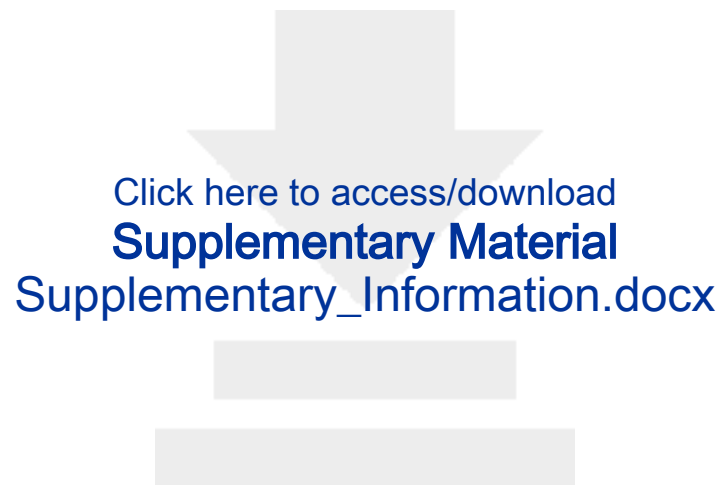

April 18, 2017

Dear Editor of *Gigascience*,

I am pleased to submit our research article entitled “First wild silkworm genome of Japanese silk moth, *Antheraea yamamai*”, to your reputed journal, *Gigascience*.

Unlike *Bombyx mori*, few studies have investigated the genomic information for the wild-type silkworm. Wild-type silkworms, *A. yamamai* and *A. pernyi*, are moth genus belonging to the family Saturniidae and which produce wild silk of commercial importance. In this article, we attempted to the whole-genome sequencing for the *A. yamamai*, thereby we constructed genome of *A. yamamai* were 656 Mb(>2kb) with 3,675 scaffolds and N50 length of assembly was 739 Kb with 34.07% GC ratio. To the best of our knowledge, these results will provide valuable genomic information for understanding the molecular mechanisms related to the specific phenotypes such as wild silk itself, and more insight into Saturniidae evolution process.

The material is original research, has not been previously published and has not been submitted for publication elsewhere while under consideration. The authors have declared that they have no conflict of interest.

I hope this paper can meet your approval and can be published at the earliest possible date.

Looking forward to hearing from you again.

Thank you.

With best regards,

Prof. Seung-Won Park

Department of Biotechnology,

Catholic University of Daegu, Gyeongsan-si, Gyeongsangbuk-do 38430, Republic of Korea,

Tel: +82-53-850-3176, E-mail: [microsw@cu.ac.kr](mailto:microsw@cu.ac.kr)
