# Supplementary material for: Genome sequence of the Japanese oak silk moth, Antheraea yamamai: the first draft genome in the family Saturniidae
Source: PubMed Central journal article supplement (PMC5774507; doi:10.1093/gigascience/gix113), 2017-11-27
Supplement: gix113_giga-d-17-00085_revision-1.pdf [file gix113_giga-d-17-00085_revision-1.pdf]

## Genome sequence of Japanese oak silk moth, *Antheraea yamamai*: the first draft genome in family Saturniidae

--Manuscript Draft--

|                                                      |                                                                                                                                                                                                                                                                                                                                                                                                                                                                                                                                                                                                                                                                                                                                                                                                                                                                                                                                                                                                                                                                                                                                                                                                                                                                                                                                                                                                                                                                                                                                                                                                                                                                                                                                                                                                                             |                   |
|------------------------------------------------------|-----------------------------------------------------------------------------------------------------------------------------------------------------------------------------------------------------------------------------------------------------------------------------------------------------------------------------------------------------------------------------------------------------------------------------------------------------------------------------------------------------------------------------------------------------------------------------------------------------------------------------------------------------------------------------------------------------------------------------------------------------------------------------------------------------------------------------------------------------------------------------------------------------------------------------------------------------------------------------------------------------------------------------------------------------------------------------------------------------------------------------------------------------------------------------------------------------------------------------------------------------------------------------------------------------------------------------------------------------------------------------------------------------------------------------------------------------------------------------------------------------------------------------------------------------------------------------------------------------------------------------------------------------------------------------------------------------------------------------------------------------------------------------------------------------------------------------|-------------------|
| <b>Manuscript Number:</b>                            | GIGA-D-17-00085R1                                                                                                                                                                                                                                                                                                                                                                                                                                                                                                                                                                                                                                                                                                                                                                                                                                                                                                                                                                                                                                                                                                                                                                                                                                                                                                                                                                                                                                                                                                                                                                                                                                                                                                                                                                                                           |                   |
| <b>Full Title:</b>                                   | Genome sequence of Japanese oak silk moth, <i>Antheraea yamamai</i> : the first draft genome in family Saturniidae                                                                                                                                                                                                                                                                                                                                                                                                                                                                                                                                                                                                                                                                                                                                                                                                                                                                                                                                                                                                                                                                                                                                                                                                                                                                                                                                                                                                                                                                                                                                                                                                                                                                                                          |                   |
| <b>Article Type:</b>                                 | Data Note                                                                                                                                                                                                                                                                                                                                                                                                                                                                                                                                                                                                                                                                                                                                                                                                                                                                                                                                                                                                                                                                                                                                                                                                                                                                                                                                                                                                                                                                                                                                                                                                                                                                                                                                                                                                                   |                   |
| <b>Funding Information:</b>                          | Rural Development Administration (PJ010442)                                                                                                                                                                                                                                                                                                                                                                                                                                                                                                                                                                                                                                                                                                                                                                                                                                                                                                                                                                                                                                                                                                                                                                                                                                                                                                                                                                                                                                                                                                                                                                                                                                                                                                                                                                                 | Dr Seong-Ryul Kim |
| <b>Abstract:</b>                                     | <p><b>Background</b><br/> <i>Antheraea yamamai</i>, also known as the Japanese oak silk moth, is a wild species of silk moth. Silk produced by <i>A. yamamai</i>, referred to as tensan silk, differs drastically from common silk produced from the domesticated silkworm, <i>Bombyx mori</i>. Its unique characteristics have led to its use in many research fields including biotechnology and medical science, and the scientific as well as economic importance of wild silk moth continues to gradually increase. However, no genomic information for wild silk moth, including <i>A. yamamai</i>, is currently available.</p> <p><b>Findings</b><br/>           In order to construct the <i>A. yamamai</i> genome, a total of 147G base pairs using Illumina and Pacbio sequencing platforms were generated, providing 210-fold coverage based on the 700 Mb estimated genome size of <i>A. yamamai</i>. The assembled genome of <i>A. yamamai</i> was 656 Mb(&gt;2kb) with 3,675 scaffolds and the N50 length of assembly was 739 Kb with 34.07% GC ratio. Identified repeat elements covered 37.33% of the total genome and the completeness of the constructed genome assembly was estimated to be 96.7% by BUSCO v2 analysis. A total of 21,124 genes were identified using Evidence Modeler based on the gene prediction results obtained from 3 different methods (ab initio, RNA-seq based, known-gene based).</p> <p><b>Conclusions</b><br/>           Here we present the genome sequence of <i>A. yamamai</i>, the first genome sequence of wild silk moth. These results provide valuable genomic information which will help enrich our understanding of the molecular mechanisms related to not only specific phenotypes such as wild silk itself, but also the genomic evolution of Saturniidae.</p> |                   |
| <b>Corresponding Author:</b>                         | Seung-Won Park<br><br>KOREA, REPUBLIC OF                                                                                                                                                                                                                                                                                                                                                                                                                                                                                                                                                                                                                                                                                                                                                                                                                                                                                                                                                                                                                                                                                                                                                                                                                                                                                                                                                                                                                                                                                                                                                                                                                                                                                                                                                                                    |                   |
| <b>Corresponding Author Secondary Information:</b>   |                                                                                                                                                                                                                                                                                                                                                                                                                                                                                                                                                                                                                                                                                                                                                                                                                                                                                                                                                                                                                                                                                                                                                                                                                                                                                                                                                                                                                                                                                                                                                                                                                                                                                                                                                                                                                             |                   |
| <b>Corresponding Author's Institution:</b>           |                                                                                                                                                                                                                                                                                                                                                                                                                                                                                                                                                                                                                                                                                                                                                                                                                                                                                                                                                                                                                                                                                                                                                                                                                                                                                                                                                                                                                                                                                                                                                                                                                                                                                                                                                                                                                             |                   |
| <b>Corresponding Author's Secondary Institution:</b> |                                                                                                                                                                                                                                                                                                                                                                                                                                                                                                                                                                                                                                                                                                                                                                                                                                                                                                                                                                                                                                                                                                                                                                                                                                                                                                                                                                                                                                                                                                                                                                                                                                                                                                                                                                                                                             |                   |
| <b>First Author:</b>                                 | Seong-Ryul Kim                                                                                                                                                                                                                                                                                                                                                                                                                                                                                                                                                                                                                                                                                                                                                                                                                                                                                                                                                                                                                                                                                                                                                                                                                                                                                                                                                                                                                                                                                                                                                                                                                                                                                                                                                                                                              |                   |
| <b>First Author Secondary Information:</b>           |                                                                                                                                                                                                                                                                                                                                                                                                                                                                                                                                                                                                                                                                                                                                                                                                                                                                                                                                                                                                                                                                                                                                                                                                                                                                                                                                                                                                                                                                                                                                                                                                                                                                                                                                                                                                                             |                   |
| <b>Order of Authors:</b>                             | Seong-Ryul Kim                                                                                                                                                                                                                                                                                                                                                                                                                                                                                                                                                                                                                                                                                                                                                                                                                                                                                                                                                                                                                                                                                                                                                                                                                                                                                                                                                                                                                                                                                                                                                                                                                                                                                                                                                                                                              |                   |
|                                                      | Woori Kwak                                                                                                                                                                                                                                                                                                                                                                                                                                                                                                                                                                                                                                                                                                                                                                                                                                                                                                                                                                                                                                                                                                                                                                                                                                                                                                                                                                                                                                                                                                                                                                                                                                                                                                                                                                                                                  |                   |
|                                                      | Kelsey Caetano-Anolles                                                                                                                                                                                                                                                                                                                                                                                                                                                                                                                                                                                                                                                                                                                                                                                                                                                                                                                                                                                                                                                                                                                                                                                                                                                                                                                                                                                                                                                                                                                                                                                                                                                                                                                                                                                                      |                   |
|                                                      | Kee-Young Kim                                                                                                                                                                                                                                                                                                                                                                                                                                                                                                                                                                                                                                                                                                                                                                                                                                                                                                                                                                                                                                                                                                                                                                                                                                                                                                                                                                                                                                                                                                                                                                                                                                                                                                                                                                                                               |                   |
|                                                      | Su-Bae Kim                                                                                                                                                                                                                                                                                                                                                                                                                                                                                                                                                                                                                                                                                                                                                                                                                                                                                                                                                                                                                                                                                                                                                                                                                                                                                                                                                                                                                                                                                                                                                                                                                                                                                                                                                                                                                  |                   |
|                                                      | Kwang-Ho Choi                                                                                                                                                                                                                                                                                                                                                                                                                                                                                                                                                                                                                                                                                                                                                                                                                                                                                                                                                                                                                                                                                                                                                                                                                                                                                                                                                                                                                                                                                                                                                                                                                                                                                                                                                                                                               |                   |
|                                                      |                                                                                                                                                                                                                                                                                                                                                                                                                                                                                                                                                                                                                                                                                                                                                                                                                                                                                                                                                                                                                                                                                                                                                                                                                                                                                                                                                                                                                                                                                                                                                                                                                                                                                                                                                                                                                             |                   |

|                                                                                                                                                                                                                                                                                                                                                                                                                                                                                                      |                                                                                                                                                                                                                                                                                                                                                                                 |
|------------------------------------------------------------------------------------------------------------------------------------------------------------------------------------------------------------------------------------------------------------------------------------------------------------------------------------------------------------------------------------------------------------------------------------------------------------------------------------------------------|---------------------------------------------------------------------------------------------------------------------------------------------------------------------------------------------------------------------------------------------------------------------------------------------------------------------------------------------------------------------------------|
|                                                                                                                                                                                                                                                                                                                                                                                                                                                                                                      | Seong-Wan Kim                                                                                                                                                                                                                                                                                                                                                                   |
|                                                                                                                                                                                                                                                                                                                                                                                                                                                                                                      | Jae-Sam Hwang                                                                                                                                                                                                                                                                                                                                                                   |
|                                                                                                                                                                                                                                                                                                                                                                                                                                                                                                      | Min-Jee Kim                                                                                                                                                                                                                                                                                                                                                                     |
|                                                                                                                                                                                                                                                                                                                                                                                                                                                                                                      | Iksoo Kim                                                                                                                                                                                                                                                                                                                                                                       |
|                                                                                                                                                                                                                                                                                                                                                                                                                                                                                                      | Tae-Won Goo                                                                                                                                                                                                                                                                                                                                                                     |
|                                                                                                                                                                                                                                                                                                                                                                                                                                                                                                      | Seung-Won Park                                                                                                                                                                                                                                                                                                                                                                  |
| <b>Order of Authors Secondary Information:</b>                                                                                                                                                                                                                                                                                                                                                                                                                                                       |                                                                                                                                                                                                                                                                                                                                                                                 |
| <b>Response to Reviewers:</b>                                                                                                                                                                                                                                                                                                                                                                                                                                                                        | <p>Dear Editor,</p> <p>We corrected our manuscript followed the editor's comment.</p> <p>The response and details of revision can be found in memo section.</p> <p>We hope our revised manuscript can meet the quality standard of the editor and future peer reviewers.</p> <p>If you need anything, just let us know.</p> <p>On behalf of all authors,<br/>Seung-Won Park</p> |
| <b>Additional Information:</b>                                                                                                                                                                                                                                                                                                                                                                                                                                                                       |                                                                                                                                                                                                                                                                                                                                                                                 |
| <b>Question</b>                                                                                                                                                                                                                                                                                                                                                                                                                                                                                      | <b>Response</b>                                                                                                                                                                                                                                                                                                                                                                 |
| Are you submitting this manuscript to a special series or article collection?                                                                                                                                                                                                                                                                                                                                                                                                                        | No                                                                                                                                                                                                                                                                                                                                                                              |
| <p><b>Experimental design and statistics</b></p> <p>Full details of the experimental design and statistical methods used should be given in the Methods section, as detailed in our <a href="#">Minimum Standards Reporting Checklist</a>. Information essential to interpreting the data presented should be made available in the figure legends.</p> <p>Have you included all the information requested in your manuscript?</p>                                                                   | Yes                                                                                                                                                                                                                                                                                                                                                                             |
| <p><b>Resources</b></p> <p>A description of all resources used, including antibodies, cell lines, animals and software tools, with enough information to allow them to be uniquely identified, should be included in the Methods section. Authors are strongly encouraged to cite <a href="#">Research Resource Identifiers</a> (RRIDs) for antibodies, model organisms and tools, where possible.</p> <p>Have you included the information requested as detailed in our <a href="#">Minimum</a></p> | Yes                                                                                                                                                                                                                                                                                                                                                                             |

|                                                                                                                                                                                                                                                                                                                                                                                                                                                                                                                                                         |     |
|---------------------------------------------------------------------------------------------------------------------------------------------------------------------------------------------------------------------------------------------------------------------------------------------------------------------------------------------------------------------------------------------------------------------------------------------------------------------------------------------------------------------------------------------------------|-----|
| <a href="#">Standards Reporting Checklist?</a>                                                                                                                                                                                                                                                                                                                                                                                                                                                                                                          |     |
| <p><b>Availability of data and materials</b></p> <p>All datasets and code on which the conclusions of the paper rely must be either included in your submission or deposited in <a href="#">publicly available repositories</a> (where available and ethically appropriate), referencing such data using a unique identifier in the references and in the “Availability of Data and Materials” section of your manuscript.</p> <p>Have you have met the above requirement as detailed in our <a href="#">Minimum Standards Reporting Checklist?</a></p> | Yes |

1 **Genome sequence of Japanese oak silk moth, *Antheraea yamamai*:**  
2  
3  
4 **the first draft genome in family Saturniidae**  
5  
6  
7

8 **Seong-Ryul Kim<sup>1†</sup>, Woori Kwak<sup>2†</sup>, Kelsey Caetano-Anolles<sup>3</sup>, Kee-Young Kim<sup>1</sup>, Su-Bae**  
9 **Kim<sup>1</sup>, Kwang-Ho Choi<sup>1</sup>, Seong-Wan Kim<sup>1</sup>, Jae-Sam Hwang<sup>1</sup>, Min-Jee Kim<sup>4</sup>, Iksoo Kim<sup>4</sup>,**  
10 **Tae-Won Goo<sup>5</sup> and Seung-Won Park<sup>6\*</sup>**  
11  
12  
13  
14  
15

16 <sup>1</sup>Department of Agricultural Biology, National Academy of Agricultural Science, Rural  
17 Development Administration, Wanju-gun 55365, Republic of Korea; <sup>2</sup>C&K Genomics, Main  
18 Bldg. #420, SNU Research Park, Seoul 151-919, Republic of Korea; <sup>3</sup>Department of  
19 Agricultural Biotechnology and Research Institute of Agriculture and Life Sciences, Seoul  
20 National University, Seoul 151-921, Republic of Korea; <sup>4</sup>College of Agriculture & Life  
21 Sciences, Chonnam National University, Gwangju, Republic of Korea; <sup>5</sup>Department of  
22 Biochemistry, Dongguk University College of Medicine, Gyeongju-si, Gyeongsangbuk-do  
23 38066, Republic of Korea; <sup>6</sup>Department of Biotechnology, Catholic University of Daegu,  
24 Gyeongsan-si, Gyeongsangbuk-do 38430, Republic of Korea  
25  
26  
27  
28  
29  
30  
31  
32  
33  
34  
35  
36  
37  
38  
39  
40  
41

42 Seong-Ryul Kim : [ksr319@korea.kr](mailto:ksr319@korea.kr); Woori Kwak : [asleo@cnkgenomics.com](mailto:asleo@cnkgenomics.com); Kelsey  
43 Caetano-Anolles : [kelseyca@gmail.com](mailto:kelseyca@gmail.com); Kee-Young Kim : [applekky@korea.kr](mailto:applekky@korea.kr); Su-Bae  
44 Kim : [subae@korea.kr](mailto:subae@korea.kr); Kwang-Ho Choi : [ckh@korea.kr](mailto:ckh@korea.kr); Seong-Wan; Seong-Wan Kim :  
45 [tarupa@korea.kr](mailto:tarupa@korea.kr); Jae-Sam Hwang : [hwangjs@korea.kr](mailto:hwangjs@korea.kr); Min-Jae Kim :  
46 [minjeekim3@gmail.com](mailto:minjeekim3@gmail.com); Iksoo Kim : [ikkim81@chonnam.ac.kr](mailto:ikkim81@chonnam.ac.kr); Tae-Won Goo :  
47 [gootw@dongguk.ac.kr](mailto:gootw@dongguk.ac.kr)  
48  
49  
50  
51  
52  
53  
54  
55  
56

57 † These authors equally contributed and should be regarded as co-first authors.  
58  
59  
60  
61  
62  
63  
64  
65

1 \* Corresponding authors  
2

3 Seung-Won Park  
4

5  
6 Department of Biotechnology,  
7

8  
9 Catholic University of Daegu,  
10

11  
12 Gyeongsan-si, Gyeongsangbuk-do 38430, Republic of Korea  
13

14  
15 Phone : +82-53-850-3176  
16

17  
18 Fax : +82-53-359-6846  
19

20  
21 E-mail: [microsw@cu.ac.kr](mailto:microsw@cu.ac.kr)  
22  
23  
24  
25  
26  
27  
28  
29  
30  
31  
32  
33  
34  
35  
36  
37  
38  
39  
40  
41  
42  
43  
44  
45  
46  
47  
48  
49  
50  
51  
52  
53  
54  
55  
56  
57  
58  
59  
60  
61  
62  
63  
64  
65

# Abstract

## Background

*Antheraea yamamai*, also known as the Japanese oak silk moth, is a wild species of silk moth. Silk produced by *A. yamamai*, referred to as *tensan* silk, differs drastically from common silk produced from the domesticated silkworm, *Bombyx mori*. Its unique characteristics have led to its use in many research fields including biotechnology and medical science, and the scientific as well as economic importance of wild silk moth continues to gradually increase. However, no genomic information for wild silk moth, including *A. yamamai*, is currently available.

## Findings

In order to construct the *A. yamamai* genome, a total of 147G base pairs using Illumina and Pacbio sequencing platforms were generated, providing 210-fold coverage based on the 700 Mb estimated genome size of *A. yamamai*. The assembled genome of *A. yamamai* was 656 Mb(>2kb) with 3,675 scaffolds and the N50 length of assembly was 739 Kb with 34.07% GC ratio. Identified repeat elements covered 37.33% of the total genome and the completeness of the constructed genome assembly was estimated to be 96.7% by BUSCO v2 analysis. A total of 21,124 genes were identified using Evidence Modeler based on the gene prediction results obtained from 3 different methods (*ab initio*, RNA-seq based, known-gene based).

## Conclusions

Here we present the genome sequence of *A. yamamai*, the first genome sequence of wild silk moth. These results provide valuable genomic information which will help enrich our understanding of the molecular mechanisms related to not only specific phenotypes such as wild silk itself, but also the genomic evolution of Saturniidae.

1 24 **Keywords**  
2  
3  
4 25 *Antheraea yamamai*, Japanese silk moth, Japanese oak silk moth, wild silkworm  
5  
6  
7  
8  
9  
10  
11  
12  
13  
14  
15  
16  
17  
18  
19  
20  
21  
22  
23  
24  
25  
26  
27  
28  
29  
30  
31  
32  
33  
34  
35  
36  
37  
38  
39  
40  
41  
42  
43  
44  
45  
46  
47  
48  
49  
50  
51  
52  
53  
54  
55  
56  
57  
58  
59  
60  
61  
62  
63  
64  
65

## Data description

*Antheraea yamamai* (Figure 1), also known as the Japanese oak silk moth, is a wild silk moth species belonging to the Saturniidae family. Silk moths can be categorized into two families- Bombycidae and Saturniidae. Saturniidae has been estimated to contain approximately 1,861 species with 162 genera[1] and is known as the largest family in Lepidoptera. Among the many species in family Saturniidae, only a few species, including *A. yamamai*, can be utilized for silk production. Previous phylogenetic studies have showed that family Saturniidae shares common ancestors with family Sphingidae, including the hawk moth (*Macroglossum stellatarum*), the and Bombycidae family, including the most representative silkworm, *Bombyx mori* [2]. Divergence time of *A. yamamai* from *B. mori* was estimated to be 87 MYA(million years ago) and *A. yamamai* is evolutionary further away from *B.mori* compared to *B. mandarina* (0.0041 MYA), which is as wild type species of *B.mori*[3, 4].

The most unique species-specific phenotypic trait of *A. yamamai* is their silk itself, which is known as tensan silk[5]. This silk shows distinctive characteristics such as thickness, bulkiness, compressive elasticity, and resistance to chemicals compared to common silk from *Bombyx mori*[6-8]. Therefore, it has attracted the attention of researchers as a new biomaterial for use in various fields[9-11]. Additionally, peptides from *A. yamamai* have been studied for their applications for human health[12-15]. However, despite the importance of wild silk moth in research and economic fields, no genomic information is currently available for this wild silk moth or any other species from family Saturniidae.

In this study, we present the genome sequence of *A. yamamai*, the first published genome in family Saturniidae, with gene expression data collected from ten different body organ tissues. This data will be a fundamental resource for future studies and provide more insight into the genome evolution and molecular phylogeny of family Saturniidae .



## 50 Sequencing

51 For whole genome sequencing, we selected one male sample(Ay-7-male1) from a breeding  
52 line (Ay-7) of *A. yamamai* raised at the National Academy of Agricultural Science, Rural  
53 Development Administration, Korea. Before conducting sequencing analysis, we conducted  
54 karyotyping analysis in order to confirm the number of chromosomes and chromosome  
55 abnormalities using a gamete in metaphase. Figure 2 shows the result of karyotyping analysis  
56 on the genome of the Japanese oak silk moth, which consists of 31 chromosomes. For  
57 genomic and transcriptomic library construction, we removed the guts of *A. yamamai* to  
58 prevent contamination of genomes from other organisms such as gut microbes and oak, the  
59 main food source of *A. yamamai*. Details of the sample preparation process used in this study  
60 are presented in supplementary information. Genomic DNA was extracted using a DNeasy  
61 Animal Mini Kit (Qiagen, Hilden, Germany) and the quality of extracted DNA was checked  
62 using trenean, picogreen assay and gel electrophoresis (1% agarose gel/ 40ng loading). After  
63 quality control processing, we were left with a total of 61.5ug of *A. yamamai* DNA for  
64 genome sequencing. Using standard Illumina whole genome shotgun(WGS) sequencing  
65 protocol (paired-end and mate-pair), we added two long read sequencing platforms, Molecu-  
66 (Illumina synthetic long read) and RS II(Pacific Bioscience). Table 1-3 shows a summary of  
67 generated data for each library used in this study. RNA-seq libraries were also constructed for  
68 genome annotation and specific gene expression of 10 different tissues (Hemocyte, Malpighi,  
69 Midgut, Fat Body, AM/Silk gland, P/Silk gland, Head, Skin, Testis, Ovary) with 3 biological  
70 replicates following standard manufacturer protocol (Illumina, San Diego, CA, USA). For  
71 this, more than 100 individual *A. yamamai* samples from the same breeding line were used  
72 for tissue anatomy and 3 samples from each tissue were selected based on the quality of  
73 extracted RNA. Information of libraries and generated data is provided in Table 4. A total of

1 74 147Gb of genomic data and 76Gb of transcriptomic data was generated for this study.

2  
3  
4 75

## 7 76 **Genome assembly and evaluation**

10  
11 77 Before conducting genome assembly, we conducted k-mer distribution analysis using a  
12  
13 78 350bp paired-end library in order to estimate the size and characteristics of the *A. yamamai*  
14  
15  
16 79 genome. The quality of our generated raw data was checked using FASTQC[16]( FastQC ,  
17  
18 80 RRID:SCR\_014583). Sequencing artifacts such as adapter sequences and low quality bases  
19  
20  
21 81 were removed using Trimmomatic[17]. Jellyfish[18] was used to count the k-mer frequency  
22  
23 82 for estimation of the genome size of *A. yamamai*. Figure 3 shows the 19-mer distribution of *A.*  
24  
25  
26 83 *yamamai* genome using a 350bp paired-end library. In the 19-mer distribution, there was a  
27  
28 84 second peak in the half x-axis of the main peak which indicates heterozygosity. Although the  
29  
30  
31 85 inbred line used in this study was maintained for more than 10 generations, high  
32  
33 86 heterozygosity still remains. This phenomenon has been observed in a previous genomic  
34  
35  
36 87 study of the black diamond moth (*Plutella xylostella*), and sustained heterozygosity as an  
37  
38 88 important genomic characteristic was hypothesized to be a result of environmental  
39  
40  
41 89 adaption[19]. Based on the result of 19-mer distribution analysis, the genome size of *A.*  
42  
43 90 *yamamai* was estimated to be 709Mb. Next, we conducted error correction on Illumina  
44  
45 91 paired-end libraries using the error correction module of Allpaths-LG[20] before the initial  
46  
47  
48 92 contig assembly process (ALLPATHS-LG , RRID:SCR\_010742). After error correction,  
49  
50 93 initial contig assembly with 350bp and 700bp libraries was conducted using SOAP  
51  
52 94 denovo2[21] with the parameter option set at K=19; this approach showed the best assembly  
53  
54  
55 95 statistics compared to other assemblers and parameters (SOAPdenovo2 ,  
56  
57 96 RRID:SCR\_014986). Quality control processing for mate-pair libraries and scaffolding was  
58  
59  
60 97 conducted using Nxtrim[22] and SSPACE (SSPACE , RRID:SCR\_011848)[23], respectively.

1 98 At each scaffolding step, SOAP Gapcloser[21] with -l 155 and -p 31 parameters was  
2  
3 99 repeatedly used to close the gaps within each scaffold. In order to obtain a higher quality  
4  
5  
6 100 genome assembly of *A. yamamai*, we employed several long read scaffolding strategies using  
7  
8 101 SSPACE-LongRead[24]. First, we used a Illumina synthetic long read sequencing platform  
9  
10  
11 102 called Moleclo which has been proven valuable for study of highly heterozygous genomes  
12  
13 103 in previous study[25, 26]. After scaffolding was performed using SSPACE-LongRead with  
14  
15 104 Illumina synthetic long read data, the total number of assembled scaffolds was effectively  
16  
17  
18 105 reduced from 398,446 to 24,558. The average scaffold length was also extended from 1.7 Kb  
19  
20 106 to 24.8 Kb. However, there was no impressive improvement in N50 length (approximately 91  
21  
22  
23 107 Kb to 112 Kb) of assembled scaffolds. Therefore, we employed another type of long read  
24  
25 108 data generated from 10 cells of Pacbio RS II system with P6-C4 chemistry. After final  
26  
27 109 scaffolding processing using Pacbio long reads, the number of scaffolds was reduced to 3,675  
28  
29  
30 110 and N50 length was effectively extended from 112 Kb to 739 Kb. Summary statistics of the  
31  
32 111 assembled *A. yamamai* genome is provided in Table 5. Final assembly of the *A. yamamai*  
33  
34  
35 112 genome was 656 Mb(>2kb) long with 3,675 scaffolds and the N50 length of assembly was  
36  
37 113 739 Kb with a 34.07% GC ratio. To evaluate the quality of the assembled genome, we  
38  
39  
40 114 conducted BUSCO (Benchmarking Universal Single-Copy Orthologs) analysis[27] using  
41  
42 115 BUSCO v2.0 with insecta\_odb9 including 1,658 BUSCOs from 42 species (BUSCO ,  
43  
44  
45 116 RRID:SCR\_015008). From BUSCO analysis, 96.7% of BUSCOs were completely detected  
46  
47 117 in the assembled genome (1,576 : complete and single-copy, 27 : complete and duplicated)  
48  
49  
50 118 among 1,658 tested BUSCOs. The number of fragmented and missing BUSCOs was 21 and  
51  
52 119 34, respectively. Based on the result of BUSCO analysis, the genome of *A.yamamai*  
53  
54  
55 120 presented here was considered properly constructed for downstream analysis.  
56  
57 121  
58  
59  
60  
61  
62  
63  
64  
65

## Repeat identification and comparative repeat analysis

To identify repeat elements of the *A. yamamai* genome, a custom repeat library was constructed using RepeatModeler with RECON[28], RepeatScout[29] and TRF[30]. The resulting constructed custom repeat library for *A. yamamai* was further curated using CENSOR[31] search and curated library was employed in RepeatMasker[32] with Repbase[33]. RepeatMasker was conducted with RMBlast and 'no\_is' option. Table 6 summarizes the proportion of identified mobile elements in the *A. yamamai* genome. The most prevalent repeat element in the *A. yamamai* genome was LINE element (101 Mb, 15.31% of total genome) and total repeat elements accounted for 37.33% of the total genome. In order to compare the repeat elements of *A. yamamai* with that of other genomes, we conducted same process for seven public genomes which are close neighbors of *A. yamamai* - *Aedes aegypti*[34], *Bombyx mori*[35], *Danaus plexippus*[36], *Drosophila melanogaster*[37], *Heliconius melpomene*[38], *Melitaea cinxia*[39] and *Plutella xylostella*[19]. Figure 4 displays the amount and proportion of identified repeat elements from the 8 species. Despite the small genome size of *B. mori*, the total amount of identified SINE element in the *B. mori* genome was 5.77 times larger than that of *A. yamamai*. The top 5 expanded repeat elements in *A. yamamai* genome were DNA/RC, LINE/L2, LINE/RTE-BovB, DNA/TcMar-Mariner and LINE/CR1. Among these, DNA/TcMar-Mariner was the specifically expanded repeat element in *A. yamamai* among 8 species. In *B. mori*, SINE/tRNA-CR1, LINE/Jockey, DNA/RC, LINE/CR1-Zenon and LINE/RTE-BovB were the top 5 expanded repeat elements. When comparing the repeat elements of *A. yamamai* with those of *B. mori*, which are both producers of the same type of silk, repeat elements showed family and species specific patterns in the two silk moth lineages. This indicates that there are differences in the genome evolution process between Saturniidae and Bombycidae families.

## Gene prediction and annotation

Three different algorithms were used for gene prediction of the *A. yamamai* genome: *ab initio*, RNA-seq transcript based, and protein homology-based approaches. For *ab initio* gene prediction, Augustus[40], Geneid[41] and GeneMarks-ET[42] were employed. Augustus was trained using known genes of *A. yamamai* in NCBI database and mapping information of RNA-seq data obtained from Tophat[43]( TopHat , RRID:SCR\_013035) was also utilized for gene prediction. Geneid was used with predefined parameters for *Drosophila melanogaster*. GeneMarks-ET was employed using junction information of genes from transcriptome data alignment. For RNA-seq transcript based prediction, generated transcriptome data from ten organ tissues of *A. yamamai* were aligned to the assembled genome and gene information was predicted using Cufflinks[44](Cufflinks , RRID:SCR\_014597). The longest CDS sequences were identified from Cufflinks results using Transdecoder. For the homology-based approach, all known genes of order Lepidoptera in the NCBI database were aligned using PASA[45]. Table 7 shows the gene prediction results from each method. Gene prediction results from different prediction algorithms were combined using EVM (Evidence Modeler)[46] and a consensus gene set of the *A. yamamai* genome was created. The final gene set of *A. yamamai* genome contains 21,124 genes. Summary statistics for the consensus gene set is provided in Table 8. The average gene length was 8,331 bp with a 38.76% GC ratio and the number of exons per gene was 4.44. To identify the function of predicted genes, Swiss-Prot[47], Uniref100[47], NCBI NR[48] database, and gene information of *B. mori* and *D. melanogaster* was employed for sequence similarity search using blastp. Additionally, protein domain search was conducted on the consensus gene set using InterproScan5[49]. Figure S1 shows the top 20 identified terms from 10 different InterproScan5 analyses. Among

1 170 the various analysis conducted using InterproScan5, gene ontology analysis showed that a  
2  
3 171 large proportion of genes in the *A.yamamai* genome were related with molecular binding,  
4  
5  
6 172 catalytic activity, internal component of membrane, metabolic process, oxidation-reduction  
7  
8 173 process and transmembrane transport.  
9

## 15 **Demographic history and comparative genome analysis**

19 176 We estimated the demographic history of *A. yamamai* using the PSMC (Pairwise Sequentially  
20  
21 Markovian Coalescent) method[50]. This method can infer the history of population size  
22 177 from a diploid sequence. 350bp paired-end reads were realigned to the assembled genome  
23  
24 178 using Bowtie2, and consensus sequence data was generated from read alignment data using  
25  
26 179 samtools[51] with parameters -d 10, -d 100. Bootstrap sampling was also executed 100 times  
27  
28 180 and the generation time was set to 1 years based on the life cycle of *A. yamamai*. Figure 5a  
29  
30 181 shows the inferred demographic history of *A. yamamai* using the PSMC model. Based on  
31  
32 182 PSMC analysis, results suggest that the population size of *A. yamamai* species consistently  
33  
34 183 increased before the last glacial period (approximately 110,000 to 12,000 years ago), which is  
35  
36 184 similar to most other insect populations. During the last glacial period, the population size  
37  
38 185 then continuously decreased. During the Late Glacial Maximum Period (13,000 to 10,000  
39  
40 186 years ago), which is also known as the beginning of the Modern Warm Period, the population  
41  
42 187 size of *A.yamamai* did not increase and stayed at a low level.  
43  
44  
45  
46  
47  
48  
49

51 189 We used OrthoMCL[52] and RBH(Reciprocal Best Hit) within blastp for identification of  
52  
53 190 gene family clusters and 1:1 orthologous gene sets. A total of 18,013 gene family clusters  
54  
55 191 were constructed and 3,586 1:1 orthologous genes were identified. Before conducting  
56  
57 192 comparative genome analysis, we constructed phylogenetic trees for the 8 species. In order to  
58  
59  
60  
61  
62  
63  
64  
65

1 193 build the phylogenetic tree, multiple sequence alignment for the 1:1 orthologous genes of all  
2  
3 194 8 species was conducted using PRANK[53], and Gblocks[54] was used to obtain conserved  
4  
5  
6 195 blocks for the phylogenetic tree. Conserved block sequences were sequentially concatenated  
7  
8  
9 196 to obtain one consensus sequence for each species. MEGA6[55] was used for constructing  
10  
11 197 Neighbor-Joining Trees (bootstrap 1000, maximum composite likelihood, transitions +  
12  
13 198 transversions, and gamma distributed option) and MrBayes[56] was employed for  
14  
15  
16 199 construction of Bayesian inference trees. To select the best evolution model for our data,  
17  
18 200 Modeltest[57] was conducted and the GTR based invariant model was chosen based on the  
19  
20  
21 201 AIC value of Modeltest. Figure 5b shows the constructed phylogenetic tree of the 8 species  
22  
23 202 using 3,586 orthologous genes. The bootstrap value and Bayesian poster probability value of  
24  
25 203 all nodes was 100 and 1, respectively. The closest neighbor of *A. yamamai* was *B. mori*,  
26  
27 204 which is included in Bombycidae family; this result is consistent with that of previous studies.  
28  
29  
30 205 Three butterfly species (*D.plexippus*, *M.cinxia* and *H. meplmene*) included in Nymphalidae  
31  
32  
33 206 family were also shown to share a common ancestor with families Saturniidae and  
34  
35 207 Bombycidae.

36  
37  
38 208 Based on the constructed phylogenetic tree, gene family expansion and contraction analysis  
39  
40  
41 209 was conducted using a 2 parameter model in CAFE[58]. Figure 5b shows the result of gene  
42  
43 210 family expansion and contraction analysis of 8 species. 10,501 and 478 gene families were  
44  
45 211 estimated to be expanded and contracted from the common ancestors of *A. yamamai*,  
46  
47  
48 212 respectively. In *B.mori*, 1,781 and 8,202 gene families were estimated for expansion and  
49  
50  
51 213 contraction, respectively. The number of expended and contracted genes in the genomes of *A.*  
52  
53 214 *yamamai* and *B. mori* indicates that there are large differences in the genome evolution  
54  
55 215 processes between the two silk moth species. *A. yamamai*'s genome also shows more specific  
56  
57  
58 216 gene family clusters when compared to the 7 other species, including *B.mori*. To identify the  
59  
60 217 related function of specific gene family clusters expanded in the *A. yamamai* genome, gene  
61  
62  
63  
64  
65

1 218 ontology pathway analysis was conducted using gene annotation information from *D.*  
2  
3 219 *melanogaster* (E-value < 1E-9) using DAVID[59]. Figure S2 shows enriched terms of  
4  
5  
6 220 biological processes for specifically expanded gene family clusters resulting from gene  
7  
8 221 ontology analysis. Specific gene clusters including UGT (UDP-glycosyltransferase) genes  
9  
10 222 were expanded in *A. yamamai* genome and were related with the function of glucose import,  
11  
12  
13 223 hexose transmembrane transport, transmembrane transport, flavonoid glucuronidation,  
14  
15 224 flavonoid biosynthetic process, oxidation-reduction process and regulation of chromatic  
16  
17  
18 225 silencing and transcription from RNA II promoter. Among these, flavonoid glucuronidation,  
19  
20 226 flavonoid biosynthetic process, and functions of transmembrane transport are closely related  
21  
22  
23 227 to the creation of silk as well as diet. It has been shown previously that prepupae of silk moth  
24  
25 228 are highly sensitive to UV-B irradiation and exposure to UV-B can dramatically decrease the  
26  
27  
28 229 pupation rates[60]. Therefore, a silk moth's cocoon is serves as a shield for protecting the  
29  
30 230 moth from UV-B containing solar radiation during the larval-pupal transformation [60] and  
31  
32  
33 231 the degree of green pigmentation was determined by the intensity of irradiation[61].  
34  
35 232 Carotenoid[62] and flavonoid[63] are pigments which are crucial for determination of cocoon  
36  
37 233 color and both pigments are derived from diet. Especially, the green cocoon color of *A.*  
38  
39  
40 234 *yamamai* has been shown to be the product of flavonoids[64]. Flavonoid is known to have a  
41  
42 235 complex metabolic process which depends more heavily on diet than carotenoids [63] and  
43  
44  
45 236 previous research has shown that the green cocoon of certain silk moth contains more than 30  
46  
47 237 kinds of flavonoids which are not present in diet[65]. Therefore, flavonoid must be properly  
48  
49  
50 238 absorbed and metabolized from the moth's diet for successful green pigmentation of the  
51  
52 239 cocoon. However, the major food source of *A. yamamai* is oak leaf, unlike *B.mori* who feed  
53  
54  
55 240 primarily on mulberry leaf. Gene ontology pathway analysis showed that major functions of  
56  
57 241 specific gene family clusters expanded in *A. yamamai* genome are related to the flavonoid  
58  
59 242 metabolism and detoxification of diet, which suggests that specific gene family expansion  
60  
61  
62  
63  
64  
65



1 243 related to food intake may reflect the impact of the environmental adaptation process on the *A.*  
2  
3 244 *yamamai* genome.

4  
5  
6 245  
7  
8  
9  
10 246 The constructed genome of *A.yamamai* presented here is the first announced genome in  
11  
12 247 family Saturniidae and we expect that this genome will provide valuable information for  
13  
14 248 future research. Although *A. yamamai* and *B. mori* appear similar, comparative genome  
15  
16  
17 249 analysis of the two species uncovered significant differences in the genome evolution  
18  
19 250 processes between families Saturniidae and Bombycidae. Therefore, this constructed genome  
20  
21  
22 251 provides more insight into the genome evolution and phylogeny of family Saturniidae, which  
23  
24 252 contains the largest number of species in Lepitoptera. Most previous phylogenetic studies  
25  
26  
27 253 were limited to few genes due to the lack of genomic information on family Saturniidae. We  
28  
29 254 expect our study and resulting constructed genome will resolve some limitations of molecular  
30  
31  
32 255 phylogenetic and ecological research on Saturniidae species. And constructed genome  
33  
34 256 information will help researchers better understand the molecular background of wild silk and  
35  
36 257 its production. Silk produced by *A. yamamai*, referred to as *tensan* silk, shows unique  
37  
38  
39 258 characteristics which has made it valuable in various fields. However, *A. yamamai* has not  
40  
41 259 been completely domesticated compared to *B. mori*, making mass production of tensan silk  
42  
43  
44 260 infeasible. Understanding of the molecular mechanisms behind the tensan silk production  
45  
46 261 process is essential for mass production using biotechnology, and we expect that our result  
47  
48  
49 262 will be a fundamental resource for related research and industrial improvement. Additionally,  
50  
51 263 the transcriptome data of 10 different organ tissues with 3 biological replications presented  
52  
53  
54 264 here may be also useful resources for uncovering the molecular mechanisms related to  
55  
56 265 specific phenotypes of *A.yamamai* and family Saturniidae.

1 **266 Availability of supporting data**

2  
3  
4  
5 267 The generated genome sequence and gene information of *A. yamamai* are available in  
6  
7 268 GigaDB[66] and generated raw data is available under project accession PRJNA383008 and  
8  
9  
10 269 PRJNA383025 of the NCBI database.

11  
12  
13  
14 **270 Competing interests**

15  
16 271 All authors report no competing interests.  
17  
18  
19

20 **272 Abbreviation**

21  
22  
23 273 RBH – Reciprocal Best Hit

24  
25  
26 274 PSMC - Pairwise Sequentially Markovian Coalescent  
27  
28  
29

30 **275 Authors contributions**

31  
32 276 Sampling - Kee-Young Kim, Su-Bae Kim  
33  
34  
35

36 277 Sequencing - Kwang-Ho Choi, Seong-Wan Kim  
37  
38  
39

40 278 Genome assembly - Seong-Ryul Kim, Woori Kwak, Jae-Sam Hwang, Seung-Won Park  
41  
42  
43

44 279 Repeat element analysis - Seong-Ryul Kim, Woori Kwak, Seung-Won Park  
45  
46

47 280 Gene prediction - Seong-Ryul Kim, Woori Kwak, Jae-Sam Hwang  
48  
49  
50

51 281 Comparative genome analysis - Seong-Ryul Kim, Woori Kwak, Min-Jae Kim, Kelsey  
52

53 282 Caetano-Anolles  
54  
55  
56

57 283 Funding and experimental design - Seong-Ryul Kim, Seung-Won Park  
58  
59  
60  
61  
62  
63  
64  
65

1 284

2

3

4 285

## **Acknowledgements**

6

7 286

This work was supported by a grant from the Rural Development Administration, Republic of Korea (grant no. PJ010442).

10

11

12

13

14

15

16

17

18

19

20

21

22

23

24

25

26

27

28

29

30

31

32

33

34

35

36

37

38

39

40

41

42

43

44

45

46

47

48

## References

1. Regier, J.C., et al., *Phylogenetic relationships of wild silkmoths (Lepidoptera: Saturniidae) inferred from four protein-coding nuclear genes*. Systematic Entomology, 2008. **33**(2): p. 219-228.
2. Regier, J.C., et al., *A large-scale, higher-level, molecular phylogenetic study of the insect order Lepidoptera (moths and butterflies)*. PLoS One, 2013. **8**(3): p. e58568.
3. Hedges, S.B., J. Dudley, and S. Kumar, *TimeTree: a public knowledge-base of divergence times among organisms*. Bioinformatics, 2006. **22**(23): p. 2971-2972.
4. Kawahara, A.Y. and J.R. Barber, *Tempo and mode of antibat ultrasound production and sonar jamming in the diverse hawkmoth radiation*. Proceedings of the National Academy of Sciences, 2015. **112**(20): p. 6407-6412.
5. Peigler, R.S., *Wild silks of the world*. American Entomologist, 1993. **39**(3): p. 151-162.
6. Nakamura, S., et al., *Physical properties and structure of silk. XI. Glass transition temperature of wild silk fibroins*. Journal of applied polymer science, 1986. **31**(3): p. 955-956.
7. 松本陽一 and 斎藤英毅, *Load-extension characteristics of composite raw silk of *Antheraea yamamai* and *Bombyx mori**. 日本蚕糸学雑誌, 1997. **66**(6): p. 497-501.
8. Kweon, H. and Y. Park, *Structural characteristics and physical properties of wild silk fibres; *Antheraea pernyi* and *Antheraea yamamai**. Korean Journal of Sericultural Science (Korea Republic), 1994.
9. Zheng, Z., et al., *Preparation of regenerated *Antheraea yamamai* silk fibroin film and controlled-molecular conformation changes by aqueous ethanol treatment*. Journal of applied polymer science, 2010. **116**(1): p. 461-467.
10. Omenetto, F., et al., *Silk based biophotonic sensors*. 2011, Google Patents.
11. Takeda, S., *New field of insect science: Research on the use of insect properties*. Entomological Science, 2013. **16**(2): p. 125-135.
12. Omenetto, F. and D.L. Kaplan, *Silk-based multifunctional biomedical platform*. 2012, Google Patents.
13. Serban, M.A., *Silk medical devices*. 2016, Google Patents.
14. Jiang, G.-L., et al., *Drug delivery platforms comprising silk fibroin hydrogels and uses thereof*. 2010, Google Patents.
15. Kamiya, M., et al., *Structure–activity relationship of a novel pentapeptide with cancer cell growth-inhibitory activity*. Journal of Peptide Science, 2010. **16**(5): p. 242-248.
16. Bioinformatics, B., *FastQC A quality control tool for high throughput sequence data*. Cambridge, UK: Babraham Institute, 2011.
17. Bolger, A.M., M. Lohse, and B. Usadel, *Trimmomatic: a flexible trimmer for Illumina sequence data*. Bioinformatics, 2014: p. btu170.

- 1 18. Marçais, G. and C. Kingsford, *A fast, lock-free approach for efficient parallel counting of*  
2 *occurrences of k-mers*. *Bioinformatics*, 2011. **27**(6): p. 764-770.
- 3
- 4 19. You, M., et al., *A heterozygous moth genome provides insights into herbivory and*  
5 *detoxification*. *Nature genetics*, 2013. **45**(2): p. 220-225.
- 6
- 7 20. Gnerre, S., et al., *High-quality draft assemblies of mammalian genomes from massively*  
8 *parallel sequence data*. *Proceedings of the National Academy of Sciences*, 2011. **108**(4): p.  
9 1513-1518.
- 10
- 11 21. Luo, R., et al., *SOAPdenovo2: an empirically improved memory-efficient short-read de*  
12 *novo assembler*. *Gigascience*, 2012. **1**(1): p. 18.
- 13
- 14 22. O'Connell, J., et al., *NxTrim: optimized trimming of Illumina mate pair reads*. *Bioinformatics*,  
15 2015. **31**(12): p. 2035-2037.
- 16
- 17 23. Boetzer, M., et al., *Scaffolding pre-assembled contigs using SSPACE*. *Bioinformatics*, 2011.  
18 **27**(4): p. 578-579.
- 19
- 20 24. Boetzer, M. and W. Pirovano, *SSPACE-LongRead: scaffolding bacterial draft genomes using*  
21 *long read sequence information*. *BMC bioinformatics*, 2014. **15**(1): p. 211.
- 22
- 23 25. Voskoboinik, A., et al., *The genome sequence of the colonial chordate, Botryllus schlosseri*.  
24 *Elife*, 2013. **2**: p. e00569.
- 25
- 26 26. McCoy, R.C., et al., *Illumina TruSeq synthetic long-reads empower de novo assembly and*  
27 *resolve complex, highly-repetitive transposable elements*. *PloS one*, 2014. **9**(9): p. e106689.
- 28
- 29 27. Simão, F.A., et al., *BUSCO: assessing genome assembly and annotation completeness with*  
30 *single-copy orthologs*. *Bioinformatics*, 2015: p. btv351.
- 31
- 32 28. Bao, Z. and S.R. Eddy, *Automated de novo identification of repeat sequence families in*  
33 *sequenced genomes*. *Genome Research*, 2002. **12**(8): p. 1269-1276.
- 34
- 35 29. Price, A.L., N.C. Jones, and P.A. Pevzner, *De novo identification of repeat families in large*  
36 *genomes*. *Bioinformatics*, 2005. **21**(suppl 1): p. i351-i358.
- 37
- 38 30. Benson, G., *Tandem repeats finder: a program to analyze DNA sequences*. *Nucleic acids*  
39 *research*, 1999. **27**(2): p. 573.
- 40
- 41 31. Kohany, O., et al., *Annotation, submission and screening of repetitive elements in Repbase:*  
42 *RepbaseSubmitter and Censor*. *BMC bioinformatics*, 2006. **7**(1): p. 474.
- 43
- 44 32. Tarailo-Graovac, M. and N. Chen, *Using RepeatMasker to identify repetitive elements in*  
45 *genomic sequences*. *Current Protocols in Bioinformatics*, 2009: p. 4.10. 1-4.10. 14.
- 46
- 47 33. Bao, W., K.K. Kojima, and O. Kohany, *Repbase Update, a database of repetitive elements in*  
48 *eukaryotic genomes*. *Mobile DNA*, 2015. **6**(1): p. 11.
- 49
- 50 34. Nene, V., et al., *Genome sequence of Aedes aegypti, a major arbovirus vector*. *Science*,  
51 2007. **316**(5832): p. 1718-1723.
- 52
- 53 35. Xia, Q., et al., *A draft sequence for the genome of the domesticated silkworm (Bombyx*  
54 *mori)*. *Science*, 2004. **306**(5703): p. 1937-1940.
- 55
- 56 36. Zhan, S., et al., *The monarch butterfly genome yields insights into long-distance migration*.  
57 *Cell*, 2011. **147**(5): p. 1171-1185.
- 58
- 59
- 60
- 61
- 62
- 63
- 64
- 65

- 1  
2  
3  
4  
5  
6  
7  
8  
9  
10  
11  
12  
13  
14  
15  
16  
17  
18  
19  
20  
21  
22  
23  
24  
25  
26  
27  
28  
29  
30  
31  
32  
33  
34  
35  
36  
37  
38  
39  
40  
41  
42  
43  
44  
45  
46  
47  
48  
49  
50  
51  
52  
53  
54  
55  
56  
57  
58  
59  
60  
61  
62  
63  
64  
65
37. Adams, M.D., et al., *The genome sequence of Drosophila melanogaster*. Science, 2000. **287**(5461): p. 2185-2195.
  38. Consortium, H.G., *Butterfly genome reveals promiscuous exchange of mimicry adaptations among species*. Nature, 2012. **487**(7405): p. 94-98.
  39. Ahola, V., et al., *The Glanville fritillary genome retains an ancient karyotype and reveals selective chromosomal fusions in Lepidoptera*. Nature communications, 2014. **5**.
  40. Stanke, M., et al., *Using native and syntenically mapped cDNA alignments to improve de novo gene finding*. Bioinformatics, 2008. **24**(5): p. 637-644.
  41. Blanco, E., G. Parra, and R. Guigó, *Using geneid to identify genes*. Current protocols in bioinformatics, 2007: p. 4.3. 1-4.3. 28.
  42. Lomsadze, A., P.D. Burns, and M. Borodovsky, *Integration of mapped RNA-Seq reads into automatic training of eukaryotic gene finding algorithm*. Nucleic acids research, 2014: p. gku557.
  43. Trapnell, C., L. Pachter, and S.L. Salzberg, *TopHat: discovering splice junctions with RNA-Seq*. Bioinformatics, 2009. **25**(9): p. 1105-1111.
  44. Trapnell, C., et al., *Differential gene and transcript expression analysis of RNA-seq experiments with TopHat and Cufflinks*. Nature protocols, 2012. **7**(3): p. 562-578.
  45. Campbell, M.A., et al., *Comprehensive analysis of alternative splicing in rice and comparative analyses with Arabidopsis*. BMC genomics, 2006. **7**(1): p. 327.
  46. Haas, B.J., et al., *Automated eukaryotic gene structure annotation using EVidenceModeler and the Program to Assemble Spliced Alignments*. Genome biology, 2008. **9**(1): p. R7.
  47. Consortium, U., *Reorganizing the protein space at the Universal Protein Resource (UniProt)*. Nucleic acids research, 2011: p. gkr981.
  48. Pruitt, K.D., T. Tatusova, and D.R. Maglott, *NCBI reference sequences (RefSeq): a curated non-redundant sequence database of genomes, transcripts and proteins*. Nucleic acids research, 2007. **35**(suppl 1): p. D61-D65.
  49. Jones, P., et al., *InterProScan 5: genome-scale protein function classification*. Bioinformatics, 2014. **30**(9): p. 1236-1240.
  50. Li, H. and R. Durbin, *Inference of human population history from individual whole-genome sequences*. Nature, 2011. **475**(7357): p. 493-496.
  51. Li, H., et al., *The sequence alignment/map format and SAMtools*. Bioinformatics, 2009. **25**(16): p. 2078-2079.
  52. Li, L., C.J. Stoeckert, and D.S. Roos, *OrthoMCL: identification of ortholog groups for eukaryotic genomes*. Genome research, 2003. **13**(9): p. 2178-2189.
  53. Löytynoja, A. and N. Goldman, *An algorithm for progressive multiple alignment of sequences with insertions*. Proceedings of the National Academy of Sciences of the United States of America, 2005. **102**(30): p. 10557.
  54. Castresana, J., *Selection of conserved blocks from multiple alignments for their use in phylogenetic analysis*. Molecular biology and evolution, 2000. **17**(4): p. 540-552.

- 1 55. Tamura, K., et al., *MEGA6: molecular evolutionary genetics analysis version 6.0*. Molecular  
2 biology and evolution, 2013: p. mst197.
- 3
- 4 56. Ronquist, F. and J.P. Huelsenbeck, *MrBayes 3: Bayesian phylogenetic inference under mixed*  
5 *models*. Bioinformatics, 2003. **19**(12): p. 1572-1574.
- 6
- 7 57. Posada, D., *Using MODELTEST and PAUP\* to select a model of nucleotide substitution*.  
8 Current protocols in bioinformatics, 2003: p. 6.5. 1-6.5. 14.
- 9
- 10 58. De Bie, T., et al., *CAFE: a computational tool for the study of gene family evolution*.  
11 Bioinformatics, 2006. **22**(10): p. 1269-1271.
- 12
- 13 59. Huang, D.W., B.T. Sherman, and R.A. Lempicki, *Systematic and integrative analysis of large*  
14 *gene lists using DAVID bioinformatics resources*. Nature protocols, 2009. **4**(1): p. 44-57.
- 15
- 16 60. Daimon, T., et al., *The silkworm Green b locus encodes a quercetin 5-O-glucosyltransferase*  
17 *that produces green cocoons with UV-shielding properties*. Proceedings of the National  
18 Academy of Sciences, 2010. **107**(25): p. 11471-11476.
- 19
- 20
- 21 61. Yoshiomi, K., et al., *Role of light in the green pigmentation of cocoons of Antheraea*  
22 *yamamai (Lepidoptera: Saturniidae)*. Applied Entomology and Zoology, 1989. **24**(4): p. 398-  
23 406.
- 24
- 25
- 26 62. Harizuka, M., *Physiological genetics of the carotenoids in Bombyx mori, with special*  
27 *reference to the pink cocoon*. Bull Seric Exp Stn Japan, 1953. **14**: p. 141-156.
- 28
- 29 63. Tazima, Y., *The silkworm: an important laboratory tool*. 1978.
- 30
- 31 64. Hirayama, C., et al., *Regioselective formation of quercetin 5-O-glucoside from orally*  
32 *administered quercetin in the silkworm, Bombyx mori*. Phytochemistry, 2008. **69**(5): p.  
33 1141-1149.
- 34
- 35 65. Tamura, Y., et al., *Flavonoid 5-glucosides from the cocoon shell of the silkworm, Bombyx*  
36 *mori*. Phytochemistry, 2002. **59**(3): p. 275-278.
- 37
- 38 66. Sneddon, T.P., P. Li, and S.C. Edmunds, *GigaDB: announcing the GigaScience database*.  
39 GigaScience, 2012. **1**(1): p. 11.
- 40
- 41
- 42
- 43
- 44
- 45
- 46
- 47
- 48
- 49
- 50
- 51
- 52
- 53
- 54
- 55
- 56
- 57
- 58
- 59
- 60
- 61
- 62
- 63
- 64
- 65

16  
17  
18  
19  
20  
21  
22  
23  
24  
25  
26  
27  
28  
29  
30  
31  
32  
33  
34  
35  
36  
37  
38  
39  
40  
41  
42  
43  
44  
45  
46  
47  
48  
49  
50  
51  
52  
53  
54  
55  
56  
57  
58  
59  
60  
61  
62  
63  
64  
65

## Tables

Table 1. Summary statistics of generated whole genome shotgun sequencing data using Illumina Nextseq 500.

| Library Name | Library Type | Insert Size | Platform   | Read Length | No. Read    | Total bp        |
|--------------|--------------|-------------|------------|-------------|-------------|-----------------|
| 350bp        | Paired-end   | 350bp       | Nextseq500 | 151         | 293,176,268 | 44,269,616,468  |
| 700bp        | Paired-end   | 700bp       | Nextseq500 | 151         | 246,945,900 | 37,288,830,900  |
| 3Kbp         | Mate-pair    | 3Kbp        | Nextseq500 | 76          | 284,204,762 | 21,599,561,912  |
| 6Kbp         | Mate-pair    | 6Kbp        | Nextseq500 | 76          | 246,238,370 | 18,714,116,120  |
| 9Kbp         | Mate-pair    | 9Kbp        | Nextseq500 | 76          | 239,919,538 | 18,233,884,888  |
| <b>Total</b> |              |             |            |             |             | 140,106,010,288 |



1 Table 2. Summary statistics of generated Illumina synthetic long read (Moleculo) library.  
2

|    | 500-1499bp | >= 1500bp |
|----|------------|-----------|
| 3  |            |           |
| 4  |            |           |
| 5  |            |           |
| 6  |            |           |
| 7  |            |           |
| 8  |            |           |
| 9  |            |           |
| 10 |            |           |
| 11 |            |           |
| 12 |            |           |
| 13 |            |           |
| 14 |            |           |
| 15 |            |           |
| 16 |            |           |
| 17 |            |           |
| 18 |            |           |
| 19 |            |           |
| 20 |            |           |
| 21 |            |           |
| 22 |            |           |
| 23 |            |           |
| 24 |            |           |
| 25 |            |           |
| 26 |            |           |
| 27 |            |           |
| 28 |            |           |
| 29 |            |           |
| 30 |            |           |
| 31 |            |           |
| 32 |            |           |
| 33 |            |           |
| 34 |            |           |
| 35 |            |           |
| 36 |            |           |
| 37 |            |           |
| 38 |            |           |
| 39 |            |           |
| 40 |            |           |
| 41 |            |           |
| 42 |            |           |
| 43 |            |           |
| 44 |            |           |
| 45 |            |           |
| 46 |            |           |
| 47 |            |           |
| 48 |            |           |
| 49 |            |           |
| 50 |            |           |
| 51 |            |           |
| 52 |            |           |
| 53 |            |           |
| 54 |            |           |
| 55 |            |           |
| 56 |            |           |
| 57 |            |           |
| 58 |            |           |
| 59 |            |           |
| 60 |            |           |
| 61 |            |           |
| 62 |            |           |
| 63 |            |           |
| 64 |            |           |
| 65 |            |           |

1 Table 3. Summary statistics of generated long reads data using Pacbio RS II system.  
2

---

|    |                                   |               |
|----|-----------------------------------|---------------|
| 3  |                                   |               |
| 4  | Number of Reads                   | 1,005,571     |
| 5  |                                   |               |
| 6  |                                   |               |
| 7  |                                   |               |
| 8  | Total Bases                       | 5,836,969,225 |
| 9  |                                   |               |
| 10 |                                   |               |
| 11 |                                   |               |
| 12 | Length of longest (shortest) read | 50,132(50)    |
| 13 |                                   |               |
| 14 |                                   |               |
| 15 | Average read length               | 5,804.63      |
| 16 |                                   |               |
| 17 |                                   |               |

---

18  
19  
20  
21  
22  
23  
24  
25  
26  
27  
28  
29  
30  
31  
32  
33  
34  
35  
36  
37  
38  
39  
40  
41  
42  
43  
44  
45  
46  
47  
48  
49  
50  
51  
52  
53  
54  
55  
56  
57  
58  
59  
60  
61  
62  
63  
64  
65

Table 4. Summary statistics of generated transcriptome data obtained from six organ tissues using Illumina platform.

| Tissue        | Sample Name     | Read Length | Read Count | Total Base (bp) |
|---------------|-----------------|-------------|------------|-----------------|
| Hemocyte      | Hemocyte_1      | 76          | 20,815,674 | 1,581,991,224   |
|               | Hemocyte_2      | 76          | 26,704,666 | 2,029,554,616   |
|               | Hemocyte_2      | 76          | 53,068,562 | 4,033,210,712   |
| Malpighi      | Malpighi_1      | 76          | 22,635,428 | 1,720,292,528   |
|               | Malpighi_2      | 76          | 24,893,788 | 1,891,927,888   |
|               | Malpighi_3      | 76          | 45,213,164 | 3,436,200,464   |
| Midgut        | Midgut_1        | 76          | 23,350,138 | 1,774,610,488   |
|               | Midgut_2        | 76          | 24,597,972 | 1,869,445,872   |
|               | Midgut_3        | 76          | 50,949,986 | 3,872,198,936   |
| Head          | Head_1          | 76          | 26,526,276 | 2,015,996,976   |
|               | Head_2          | 76          | 26,581,124 | 2,020,165,424   |
|               | Head_3          | 76          | 40,900,456 | 3,108,434,656   |
| Skin          | Skin_1          | 76          | 24,592,846 | 1,869,056,296   |
|               | Skin_2          | 76          | 42,775,430 | 3,250,932,680   |
|               | Skin_3          | 76          | 35,043,570 | 2,663,311,320   |
| Fat Body      | Fat Body_1      | 76          | 24,637,810 | 1,872,473,560   |
|               | Fat Body_2      | 76          | 24,037,494 | 1,826,849,544   |
|               | Fat Body_3      | 76          | 40,817,582 | 3,102,136,232   |
| AM/Silk Gland | AM/Silk Gland_1 | 76          | 21,399,638 | 1,626,372,488   |
|               | AM/Silk Gland_2 | 76          | 24,292,386 | 1,846,221,336   |
|               | AM/Silk Gland_3 | 76          | 37,331,530 | 2,837,196,280   |
| P/Silk Gland  | P/Silk Gland_1  | 76          | 27,359,580 | 2,079,328,080   |
|               | P/Silk Gland_2  | 76          | 23,300,962 | 1,770,873,112   |
|               | P/Silk Gland_3  | 76          | 39,421,430 | 2,996,028,680   |
| Testis        | Testis_1        | 76          | 40,890,404 | 3,107,670,704   |
|               | Testis_2        | 76          | 45,733,846 | 3,475,772,296   |
|               | Testis_3        | 76          | 44,985,224 | 3,418,877,024   |
| Ovary         | Ovary_1         | 76          | 40,797,628 | 3,100,619,728   |
|               | Ovary_2         | 76          | 40,409,752 | 3,071,141,152   |
|               | Ovary_3         | 76          | 42,417,892 | 3,223,759,792   |

1 Table 5. Summary statistics of the *A. yamamai* genome (>2kb).  
2  
3

4 **Assembled Genome**  
5

---

|    |                                  |                   |
|----|----------------------------------|-------------------|
| 6  | Size(1n)                         | 656 Mb            |
| 7  |                                  |                   |
| 8  | GC level                         | 34.07             |
| 9  |                                  |                   |
| 10 | No. scaffolds                    | 3,675             |
| 11 |                                  |                   |
| 12 | N50 of scaffolds (bp)            | 739,388           |
| 13 |                                  |                   |
| 14 | N bases in scaffolds (%)         | 19,257,439 (2.93) |
| 15 |                                  |                   |
| 16 | Longest(shortest) scaffolds (bp) | 3,156,949 (2,003) |
| 17 |                                  |                   |
| 18 | Average scaffold Length (bp)     | 178,657.53        |

---

19  
20  
21  
22  
23  
24  
25  
26  
27  
28  
29  
30  
31  
32  
33  
34  
35  
36  
37  
38  
39  
40  
41  
42  
43  
44  
45  
46  
47  
48  
49  
50  
51  
52  
53  
54  
55  
56  
57  
58  
59  
60  
61  
62  
63  
64  
65

1  
2  
3  
4  
5  
6  
7  
8  
9  
10  
11  
12  
13  
14  
15  
16  
17  
18  
19  
20  
21  
22  
23  
24  
25  
26  
27  
28  
29  
30  
31  
32  
33  
34  
35  
36  
37  
38  
39  
40  
41  
42  
43  
44  
45  
46  
47  
48  
49  
50  
51  
52  
53  
54  
55  
56  
57  
58  
59  
60  
61  
62  
63  
64  
65

| <b>Repeat Element</b> | <b>No. Element</b> | <b>Length (%)</b>  |
|-----------------------|--------------------|--------------------|
| SINE                  | 59,968             | 8,615,338(1.30)    |
| LINE                  | 426,522            | 101,251,176(15.31) |
| LTR element           | 53,977             | 4,552,386(0.69)    |
| DNA element           | 512,760            | 69,071,227(10.44)  |
| Small RNA             | 43,645             | 6,691,619(1.01)    |
| Simple repeat         | 135,989            | 6,256,839(0.95)    |
| Low complexity        | 19,937             | 932,829(0.14)      |
| Unclassified          | 294,190            | 54,552,009(8.25)   |

Table 6. Summary of identified repeat elements in the *A. yamamai* genome.

16  
17  
18  
19  
20  
21  
22  
23  
24  
25  
26  
27  
28  
29  
30  
31  
32  
33  
34  
35  
36  
37  
38  
39  
40  
41  
42  
43  
44  
45  
46  
47  
48  
49  
50  
51  
52  
53  
54  
55  
56  
57  
58  
59  
60  
61  
62  
63  
64  
65

Table 7. Summary statistics of ab initio, RNA-seq based and homology-based gene prediction results.

| Evidence Type                    | Programs       | Element                   | Total count | Exon/Gene | Total length(bp) | Mean length(bp) |           |
|----------------------------------|----------------|---------------------------|-------------|-----------|------------------|-----------------|-----------|
| <i>ab_initio</i>                 | Augustus       | Gene                      | 14,576      | 4.85      | 142,415,318      | 9,770.53        |           |
|                                  |                | Exon                      | 70,733      |           | 14,736,668       | 208.34          |           |
|                                  | Geneid         | Gene                      | 10,946      | 2.25      | 46,119,402       | 4,213.35        |           |
|                                  |                | Exon                      | 24,686      |           | 3,925,563        | 159.01          |           |
|                                  | GeneMarks-ET   | Gene                      | 27,754      | 5.50      | 273,745,951      | 9,863.29        |           |
|                                  |                | Exon                      | 152,660     |           | 30,847,503       | 202.06          |           |
|                                  | RNA-seq        | Cufflinks<br>Transdecoder | Gene        | 36,213    | 7.03             | 840,429,061     | 23,207.94 |
|                                  |                |                           | Exon        | 254,770   |                  | 201,721,675     | 791.77    |
| Known Gene<br>(NCBI lepidoptera) | PASA<br>(gmap) |                           | 44,561      |           | 22,484,151       | 504.57          |           |

15  
16  
17  
18  
19  
20  
21  
22  
23  
24  
25  
26  
27  
28  
29  
30  
31  
32  
33  
34  
35  
36  
37  
38  
39  
40  
41  
42  
43  
44  
45  
46  
47  
48  
49  
50  
51  
52  
53  
54  
55  
56  
57  
58  
59  
60  
61  
62  
63  
64  
65

Table 8. Summary statistics for the consensus gene set of the *A. yamamai* genome.

---

| Element | No. elements | Exon/Gene | Avg. length | Total length | Genome coverage |
|---------|--------------|-----------|-------------|--------------|-----------------|
| Gene    | 21,124       |           | 8,331.63    | 175,997,473  | 26.61           |
|         |              | 4.44      |             |              |                 |
| Exon    | 93,950       |           | 236.53      | 22,222,354   | 3.35            |

---

16  
17  
18  
19  
20  
21  
22  
23  
24  
25  
26  
27  
28  
29  
30  
31  
32  
33  
34  
35  
36  
37  
38  
39  
40  
41  
42  
43  
44  
45  
46  
47  
48  
49  
50  
51  
52  
53  
54  
55  
56  
57  
58  
59  
60  
61  
62  
63  
64  
65

## Figures

Figure 1. Photograph of *Antheraea Yamamai*. From left- larva, cocoon and adult *A. yamamai*, respectively. Green color is one of the representative characteristics of tensan silk.

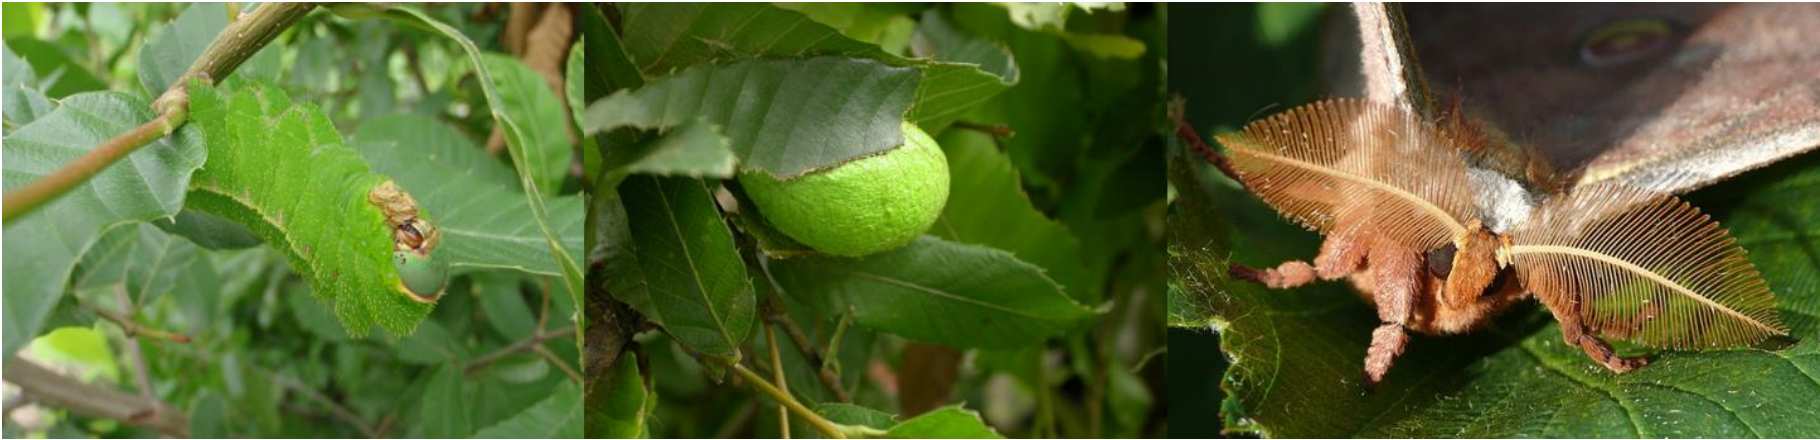



Figure 2. Karyotype of *A.yamamai* using a gamete of testis in metaphase.

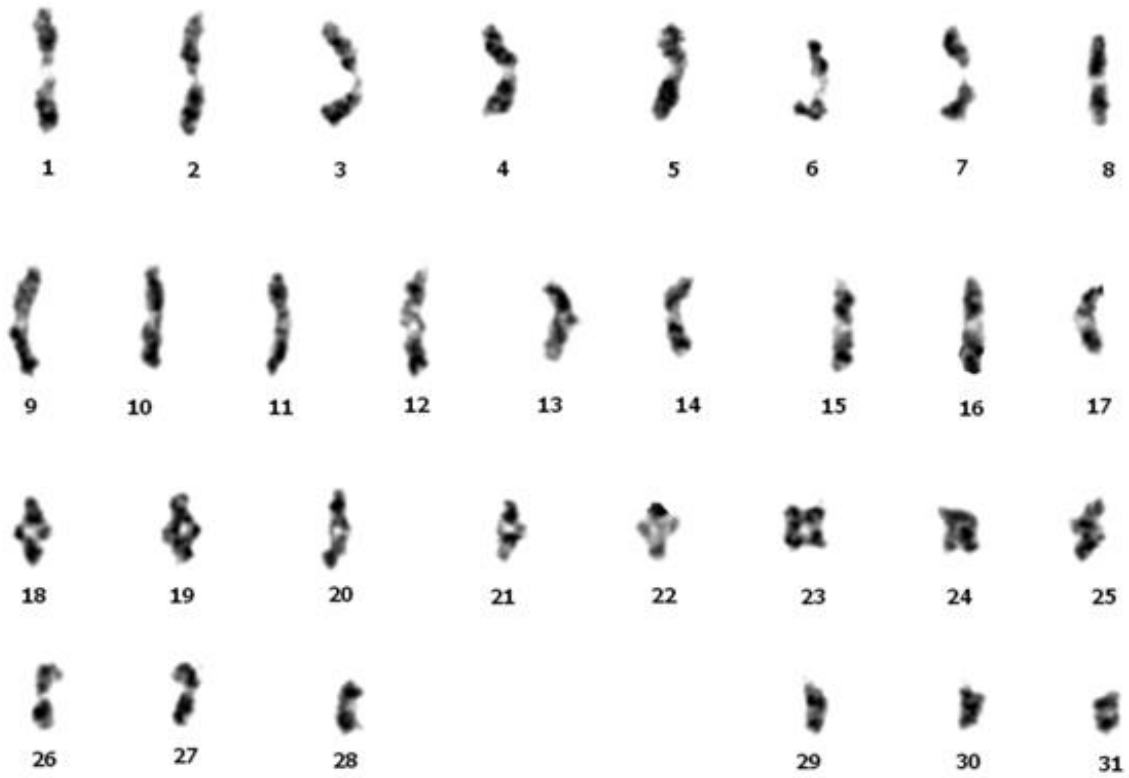

1  
2  
3  
4  
5  
6  
7  
8  
9  
10  
11  
12  
13  
14  
15  
16  
17  
18  
19  
20  
21  
22  
23  
24  
25  
26  
27  
28  
29  
30  
31  
32  
33  
34  
35  
36  
37  
38  
39  
40  
41  
42  
43  
44  
45  
46  
47  
48  
49  
50  
51  
52  
53  
54  
55  
56  
57  
58  
59  
60  
61  
62  
63  
64  
65

1 Figure 3. 19-mer distribution of *A. yamamai* genome using jellyfish with 350bp paired-end  
2  
3 whole genome sequencing data.  
4  
5  
6  
7

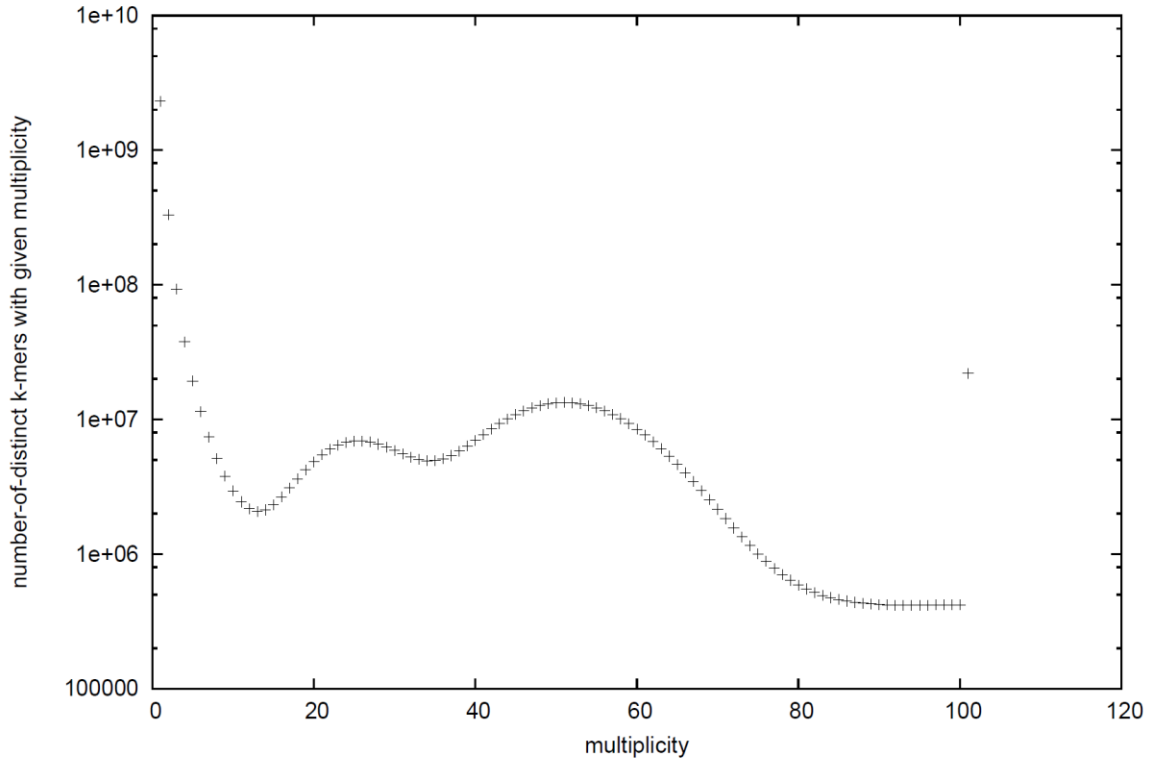

1 Figure 4. Amount and proportion of identified repeat element from 8 species including *A.*  
 2 *yamamai*. a. Absolute amount of repeat element classified into 8 different categories. b.  
 3  
 4  
 5  
 6 Proportion of each repeat element in identified total repeat element.  
 7  
 8  
 9  
 10  
 11  
 12  
 13  
 14  
 15  
 16  
 17  
 18  
 19  
 20  
 21  
 22  
 23  
 24  
 25  
 26  
 27  
 28  
 29  
 30  
 31  
 32  
 33  
 34  
 35  
 36  
 37  
 38  
 39  
 40  
 41  
 42  
 43  
 44  
 45  
 46  
 47  
 48  
 49  
 50  
 51  
 52  
 53  
 54  
 55  
 56  
 57  
 58  
 59  
 60  
 61  
 62  
 63  
 64  
 65

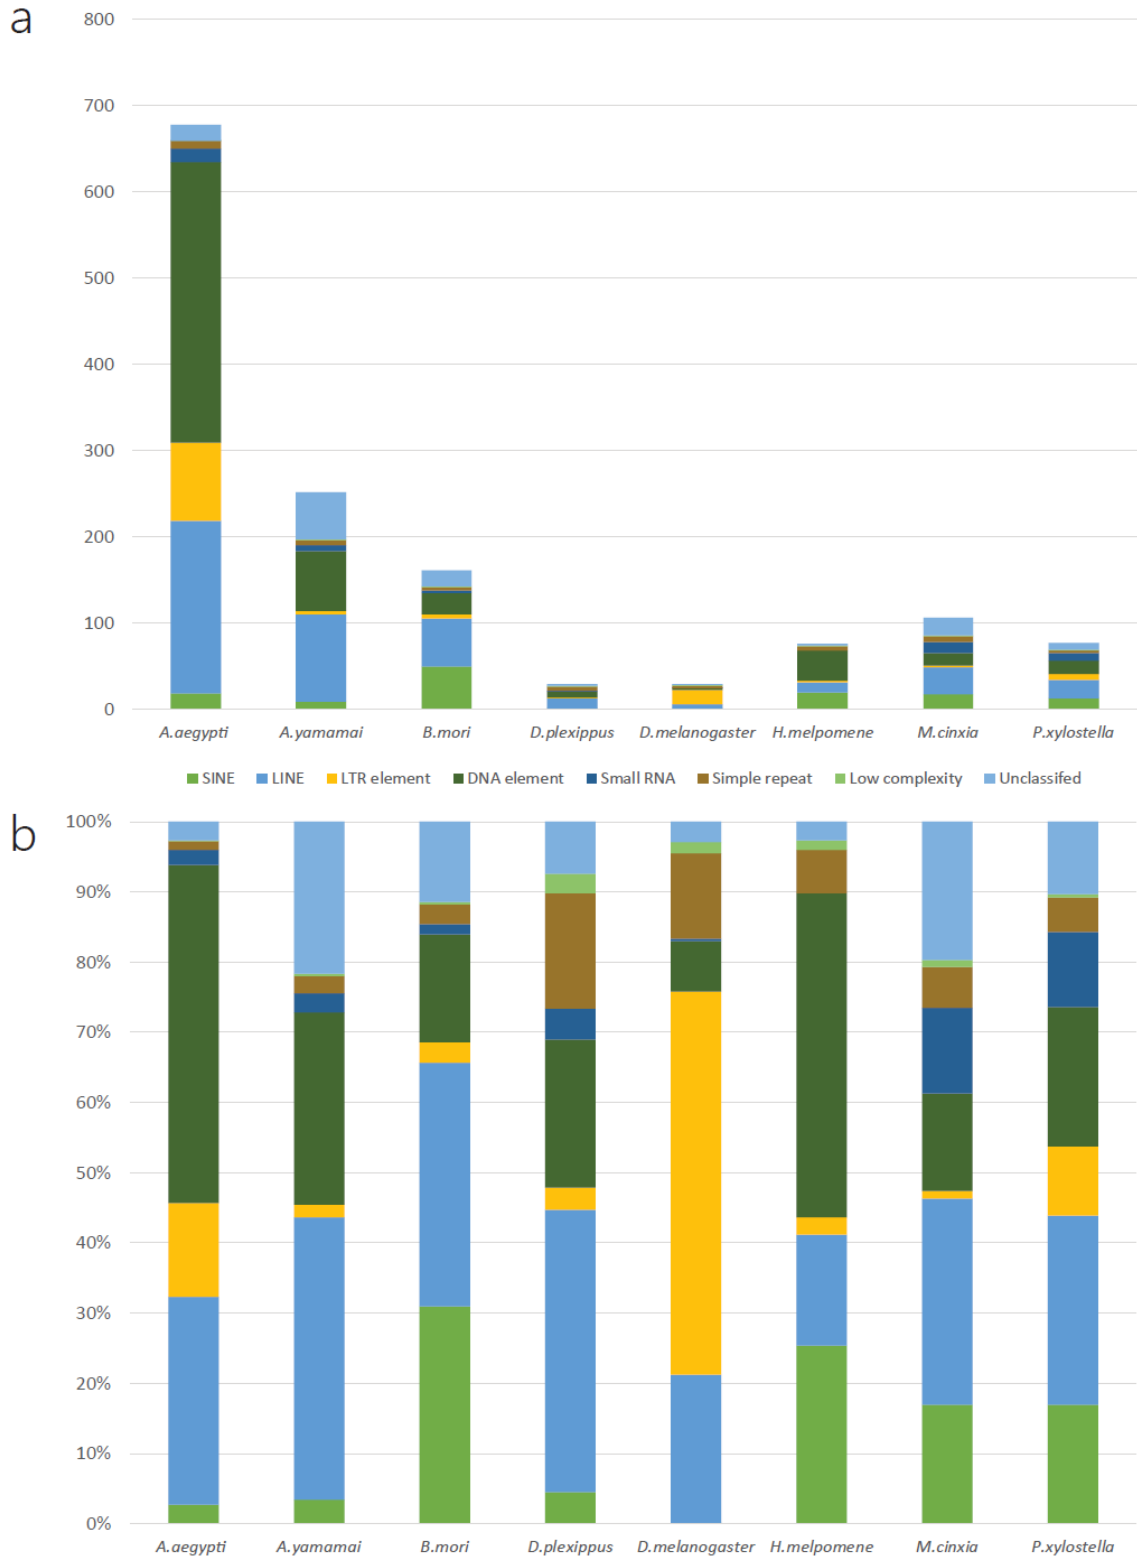

Figure 5. Demographic history of *A. yamamai* using PSMC and comparative gene family analysis. Node value indicate Bayesian posterior probability, bootstrap and gene expansion, contraction value. Orange and blue color indicate expansion and contraction, respectively.

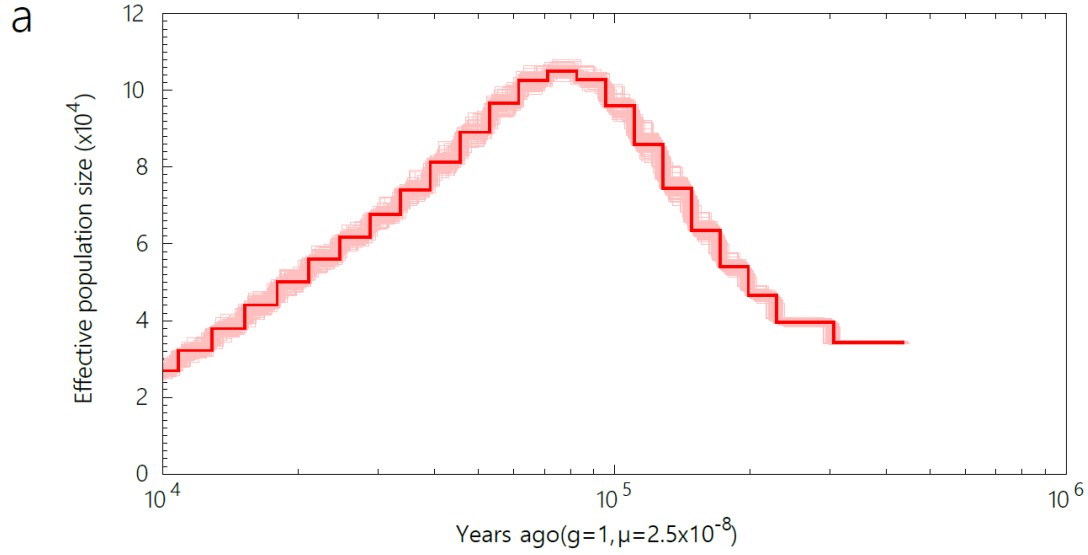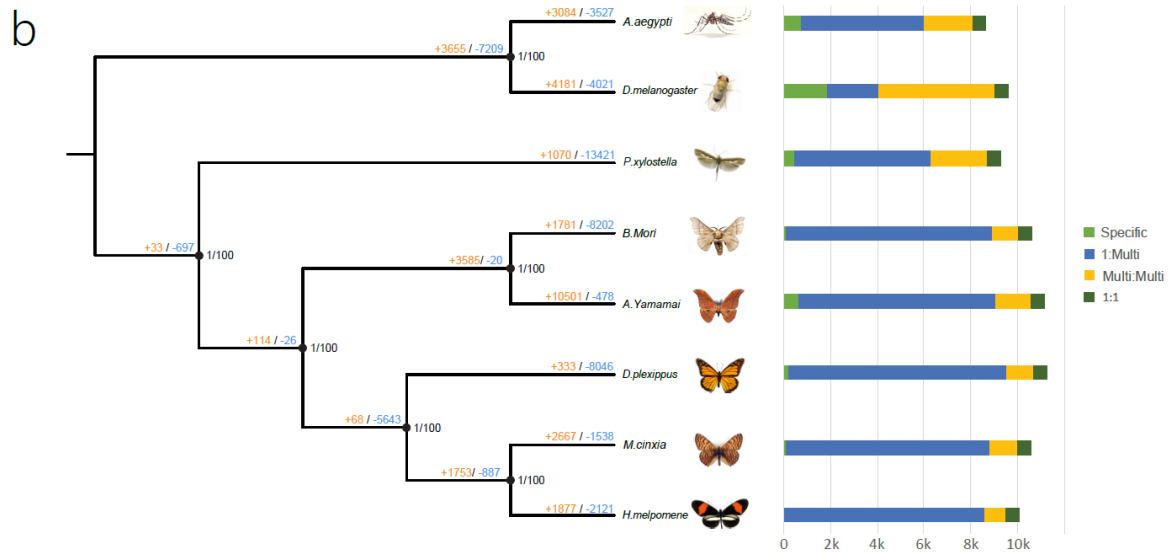

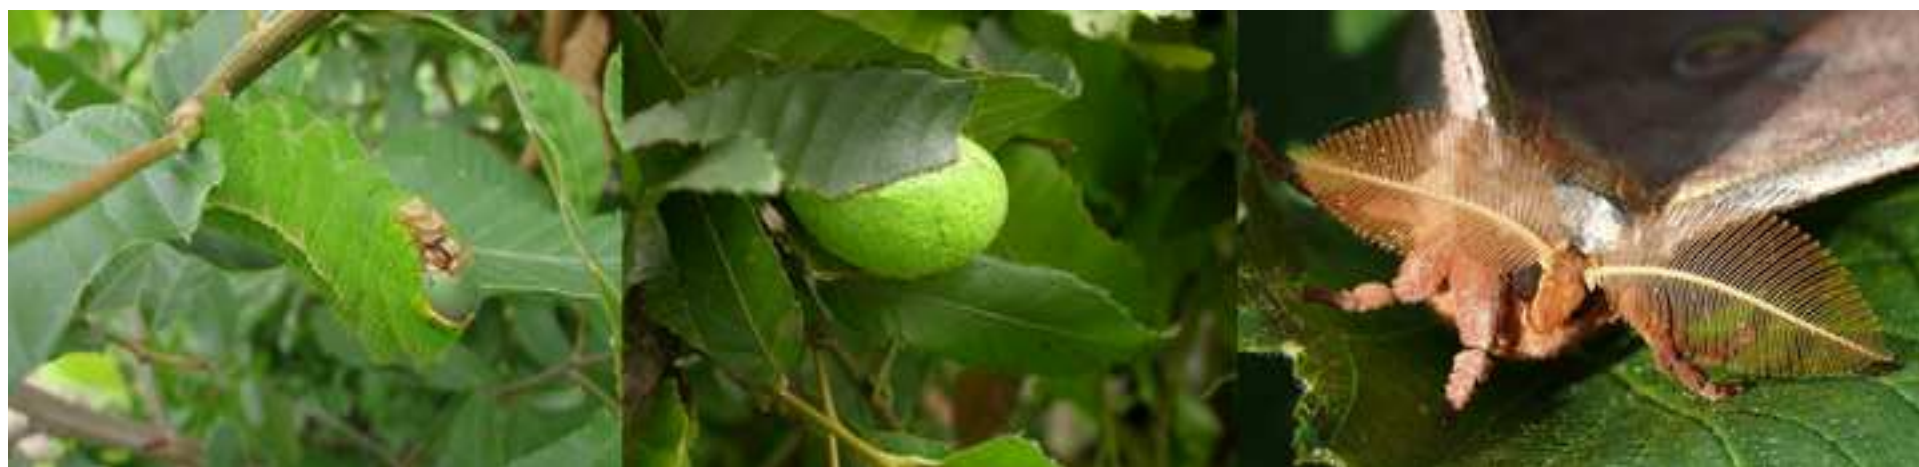

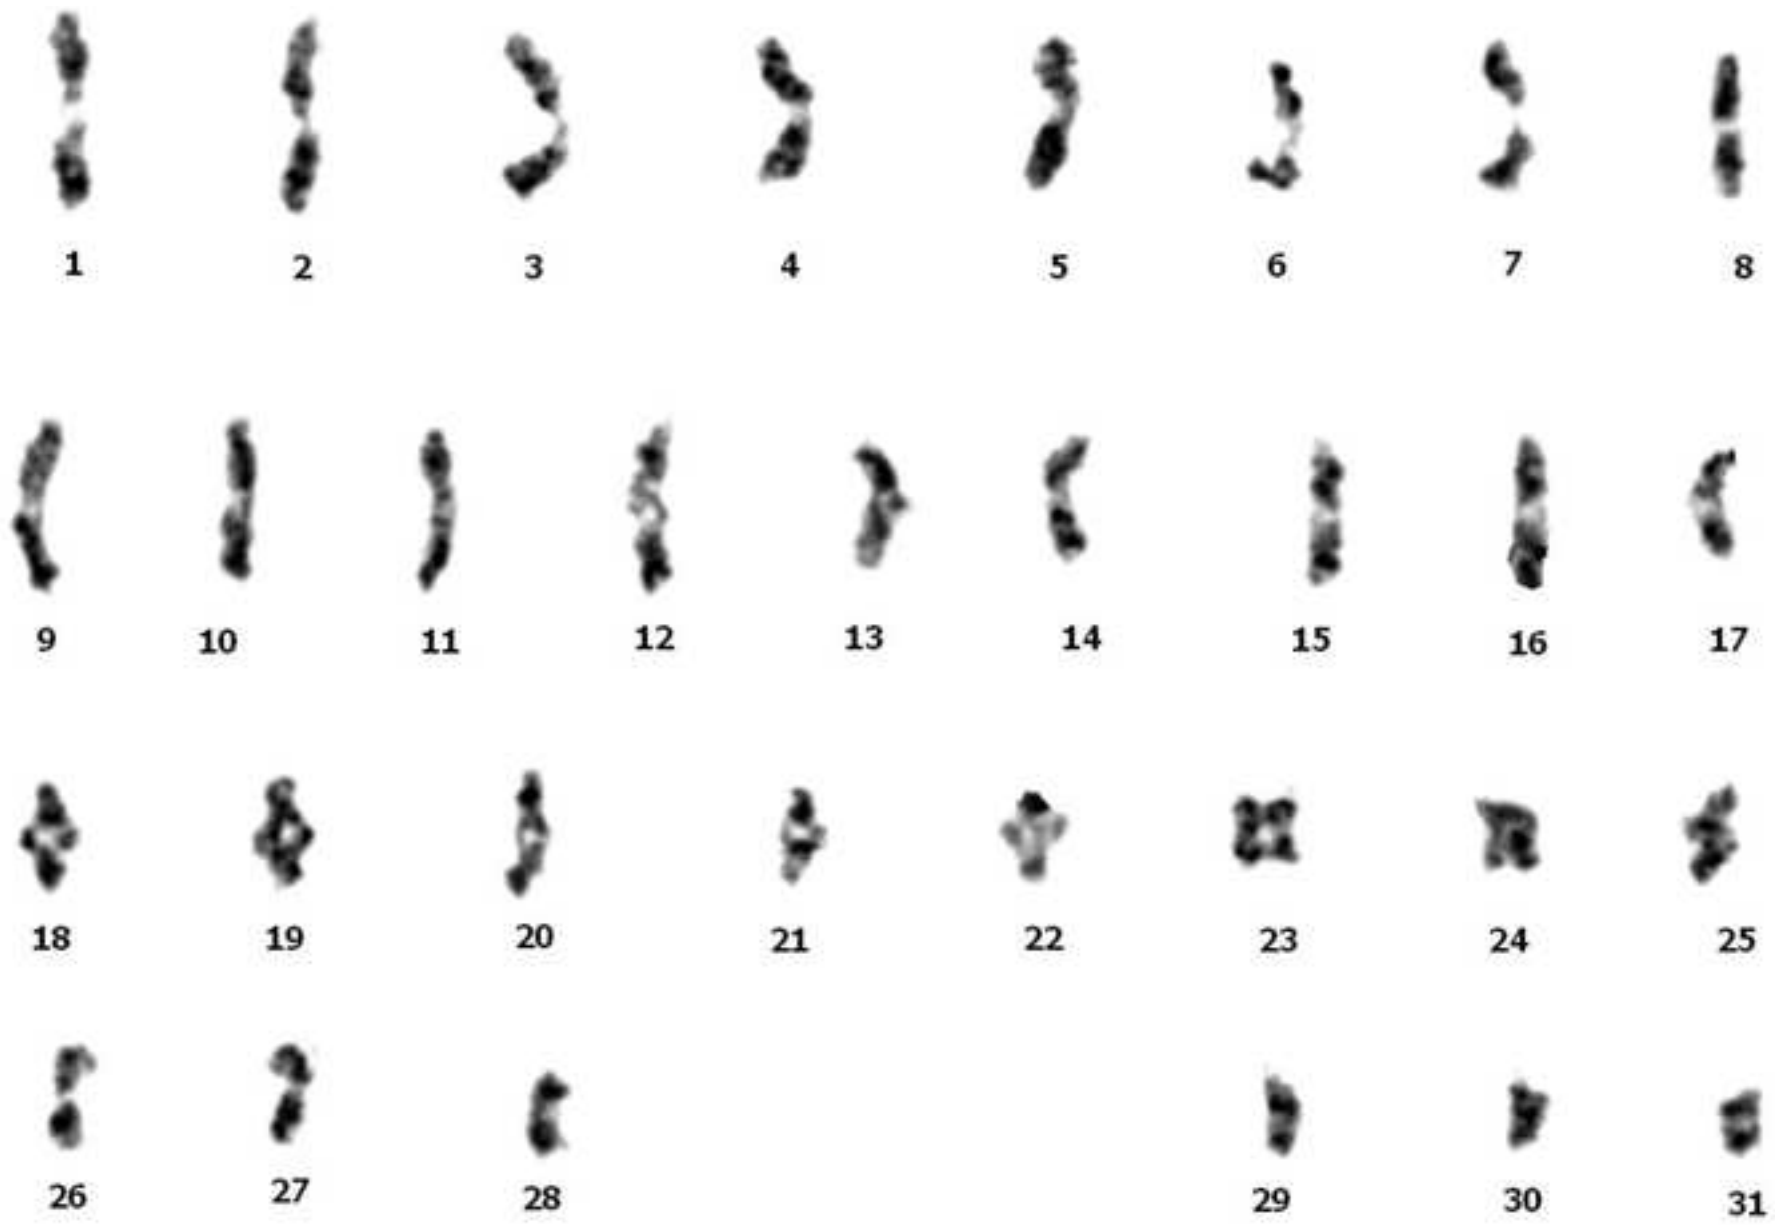

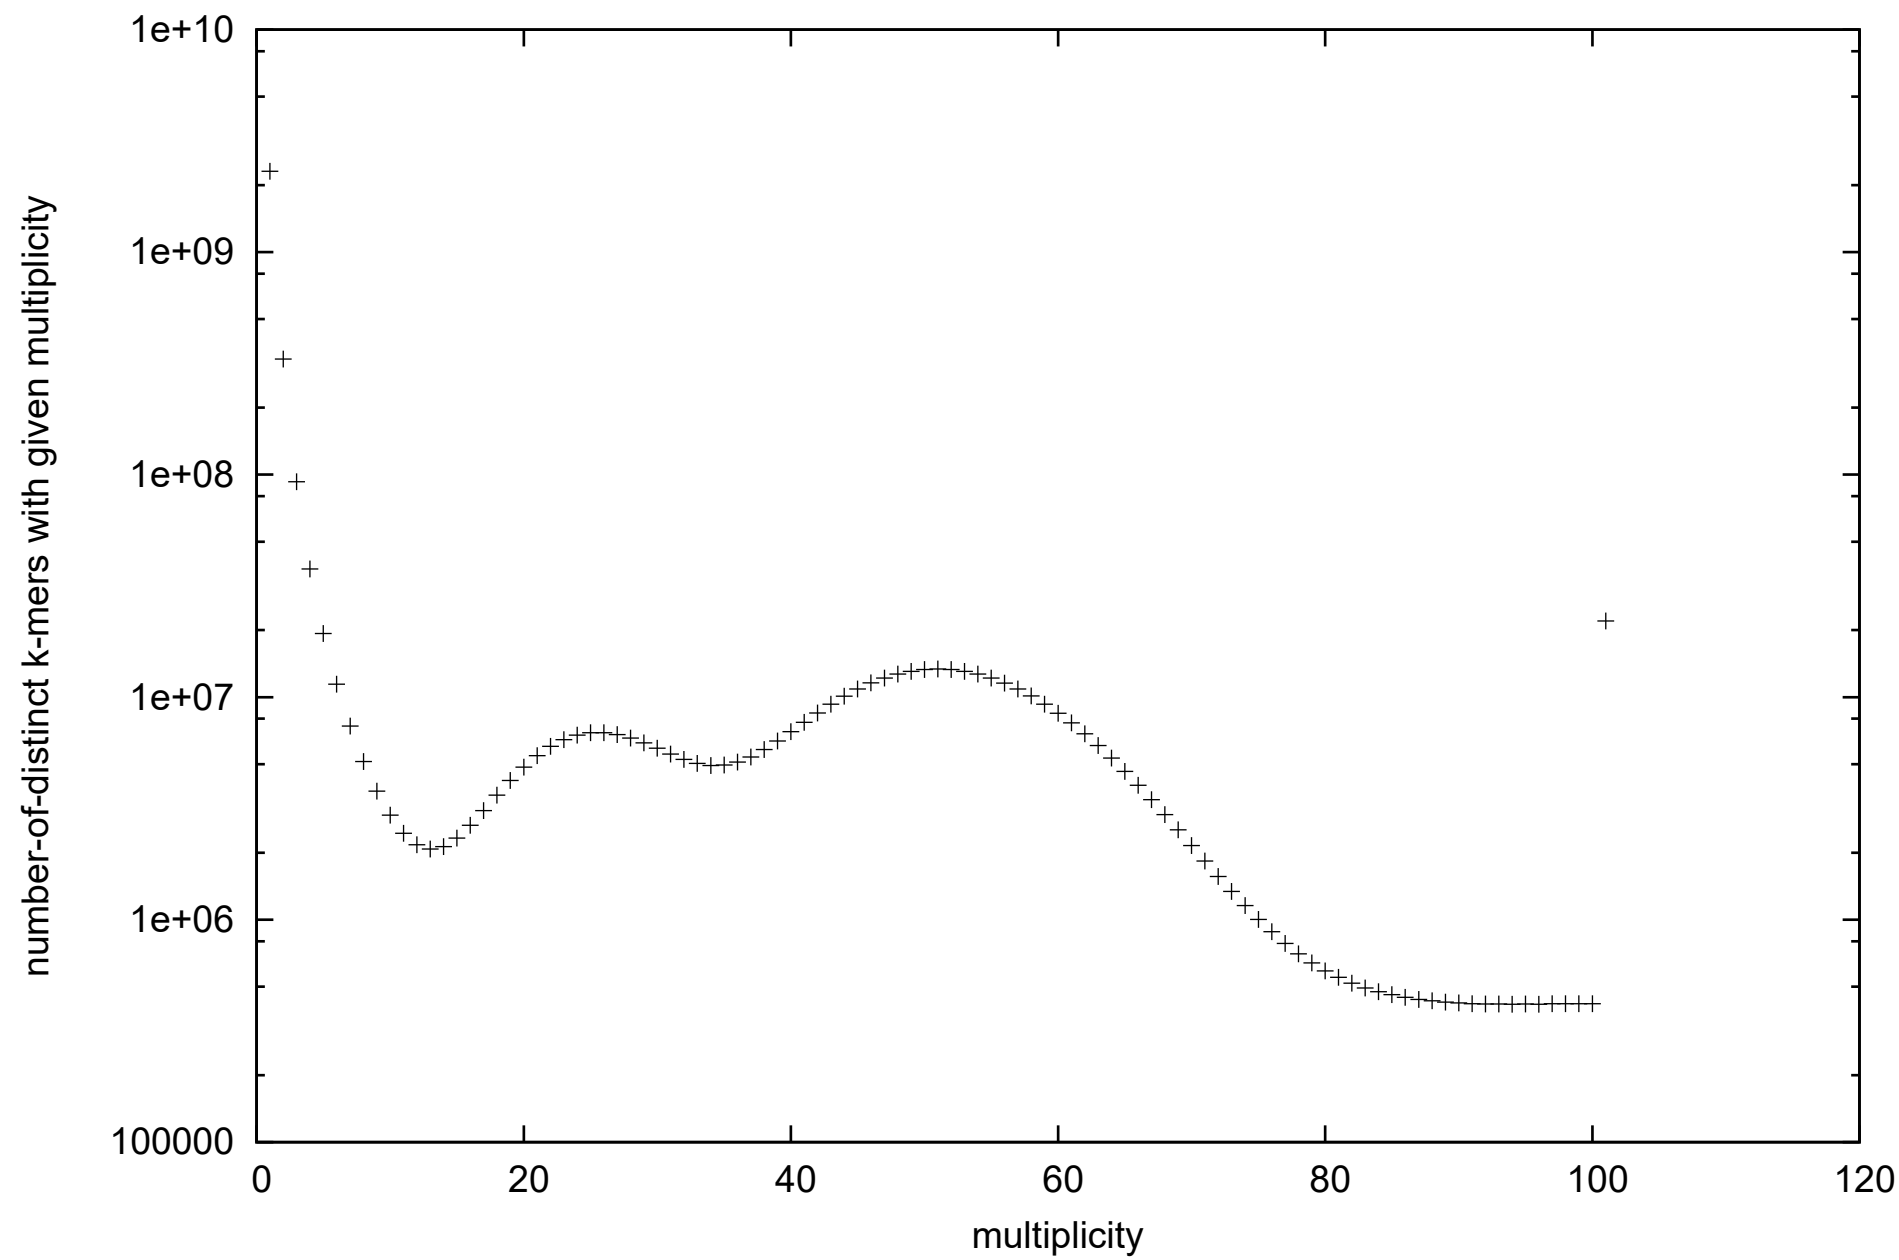

Figure a

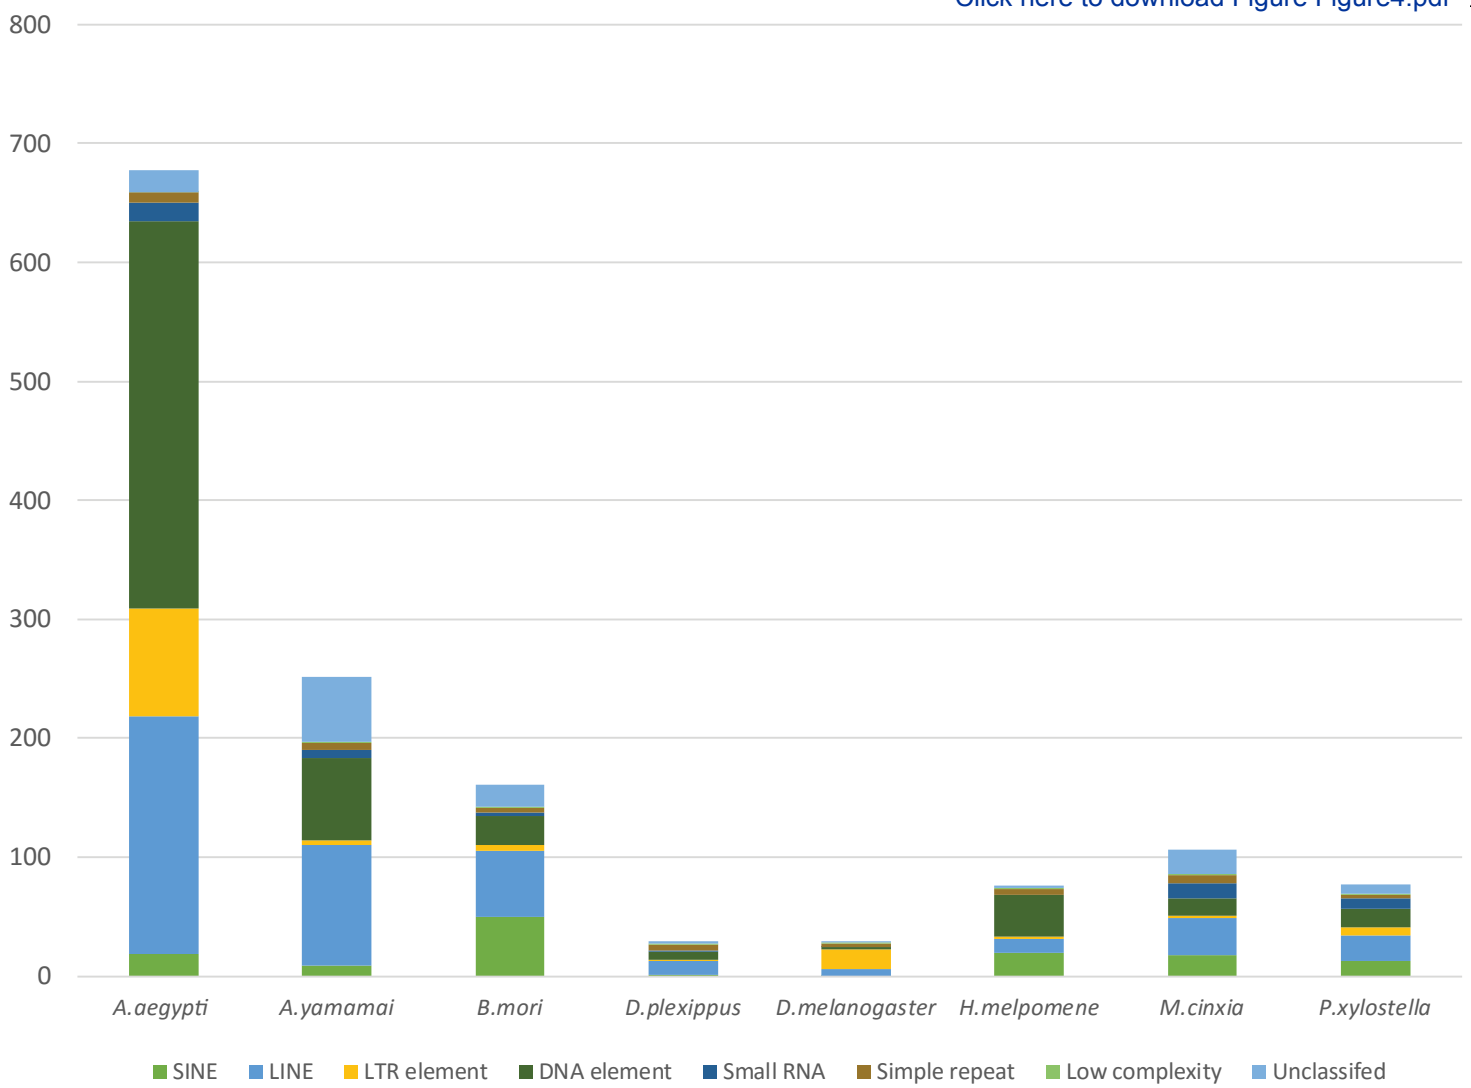

b

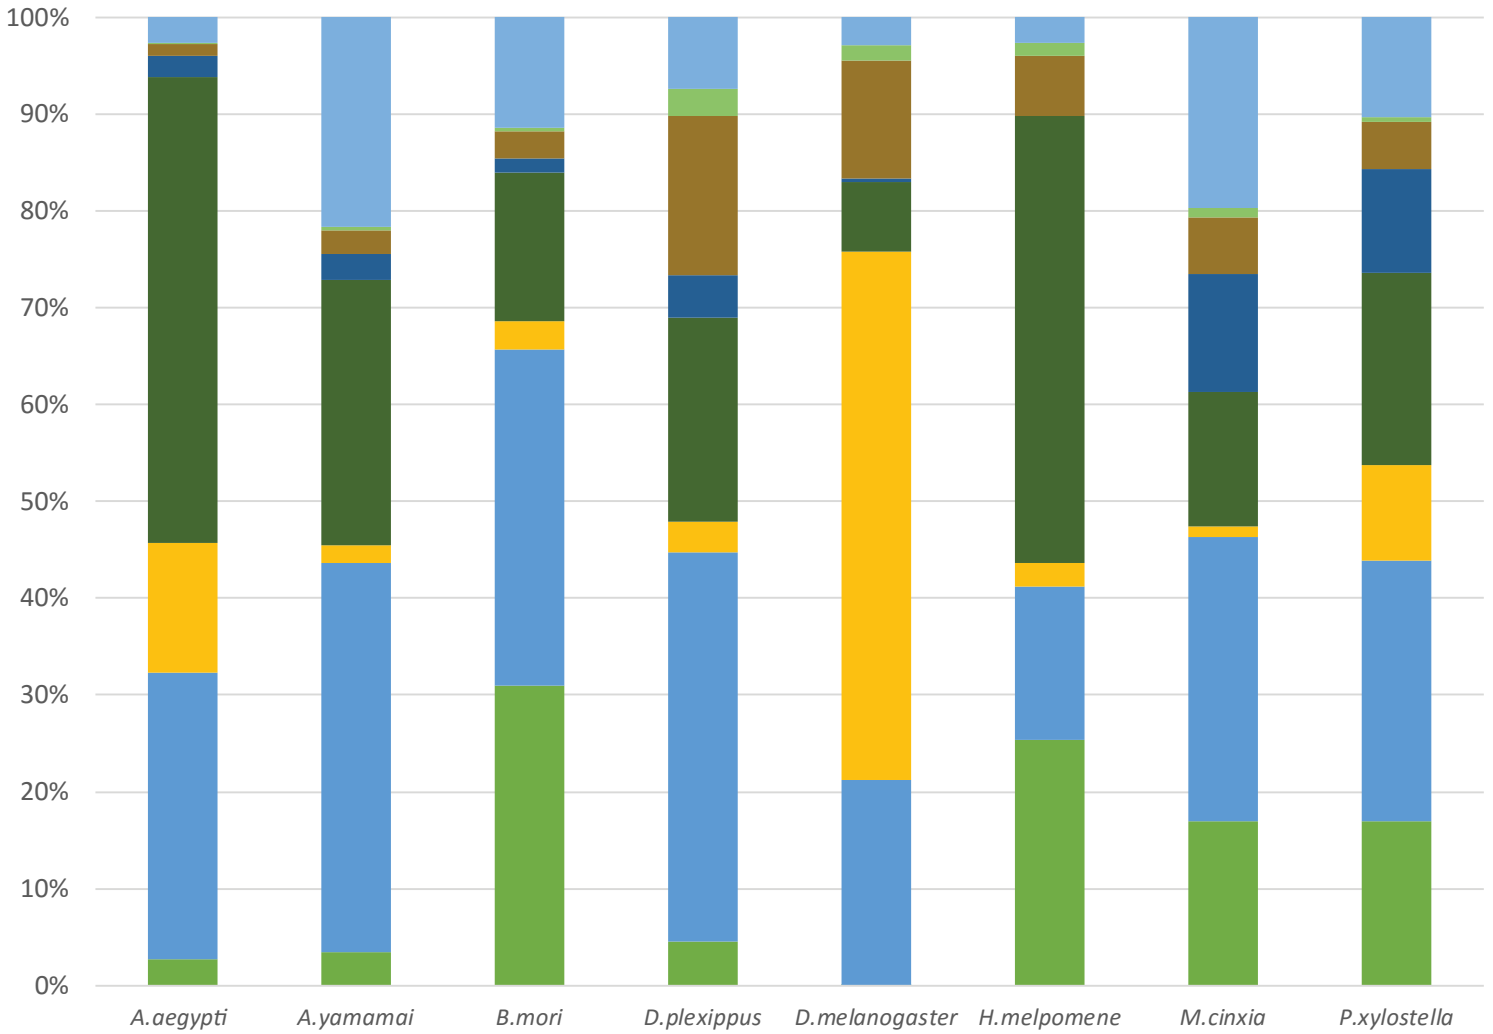



a

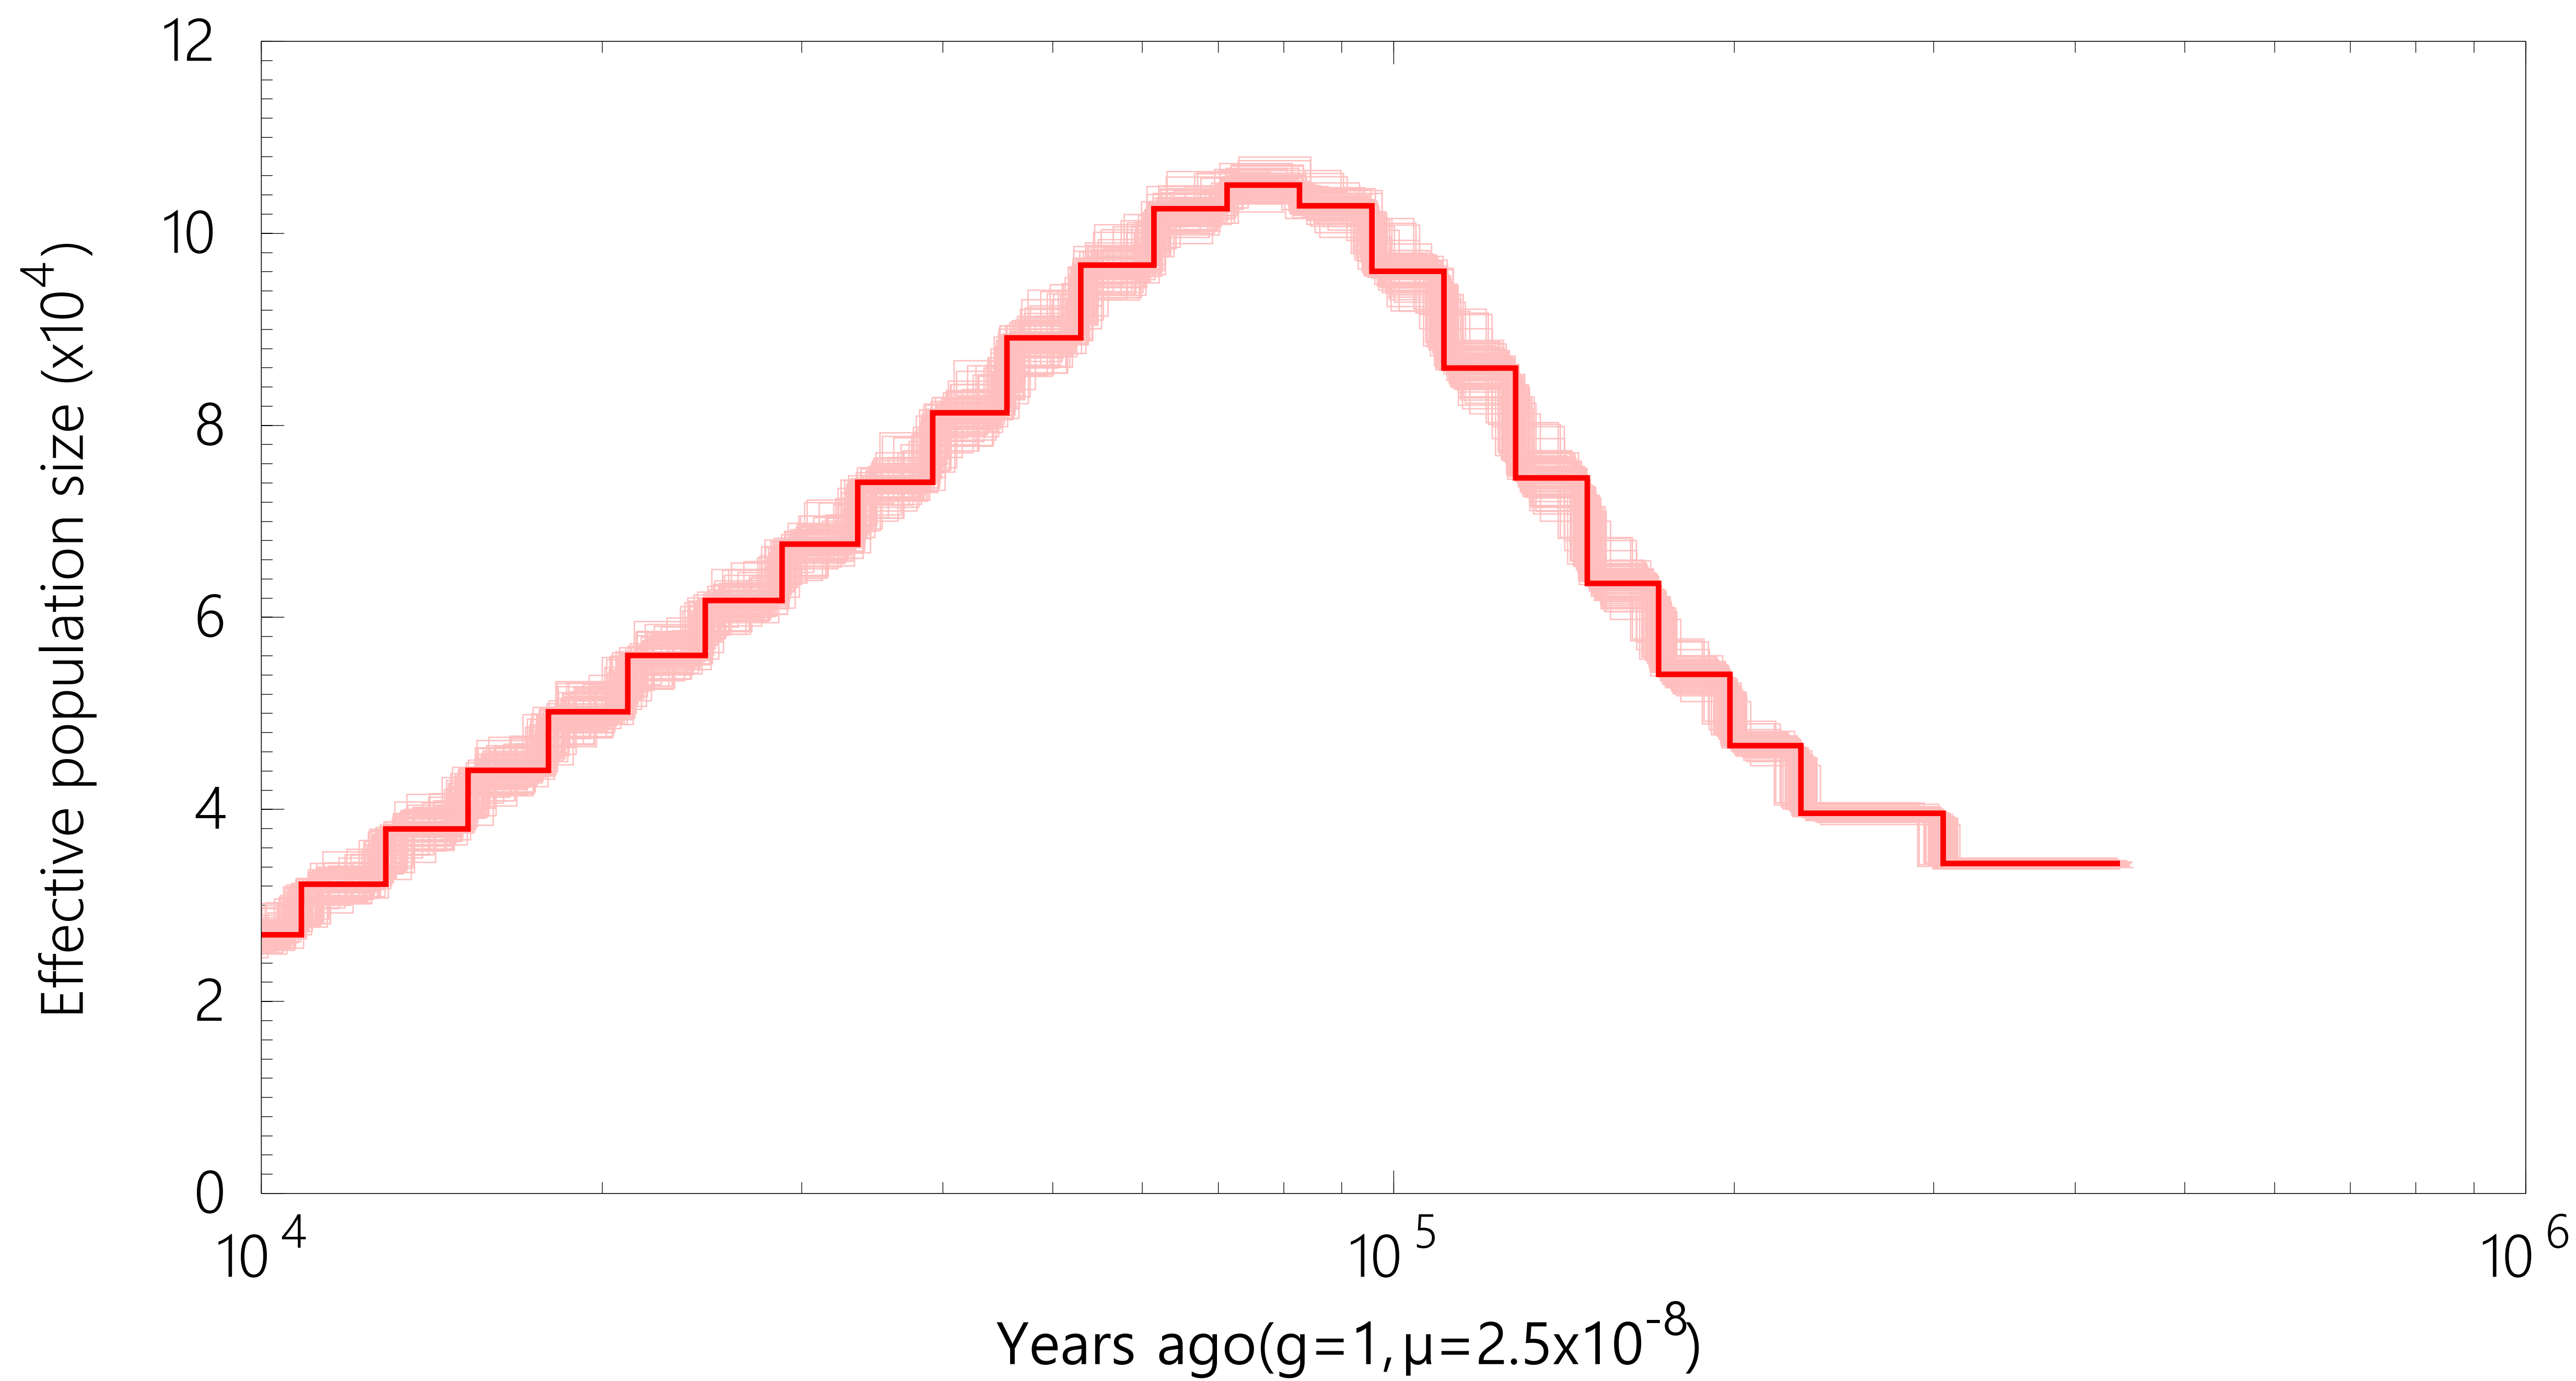

b

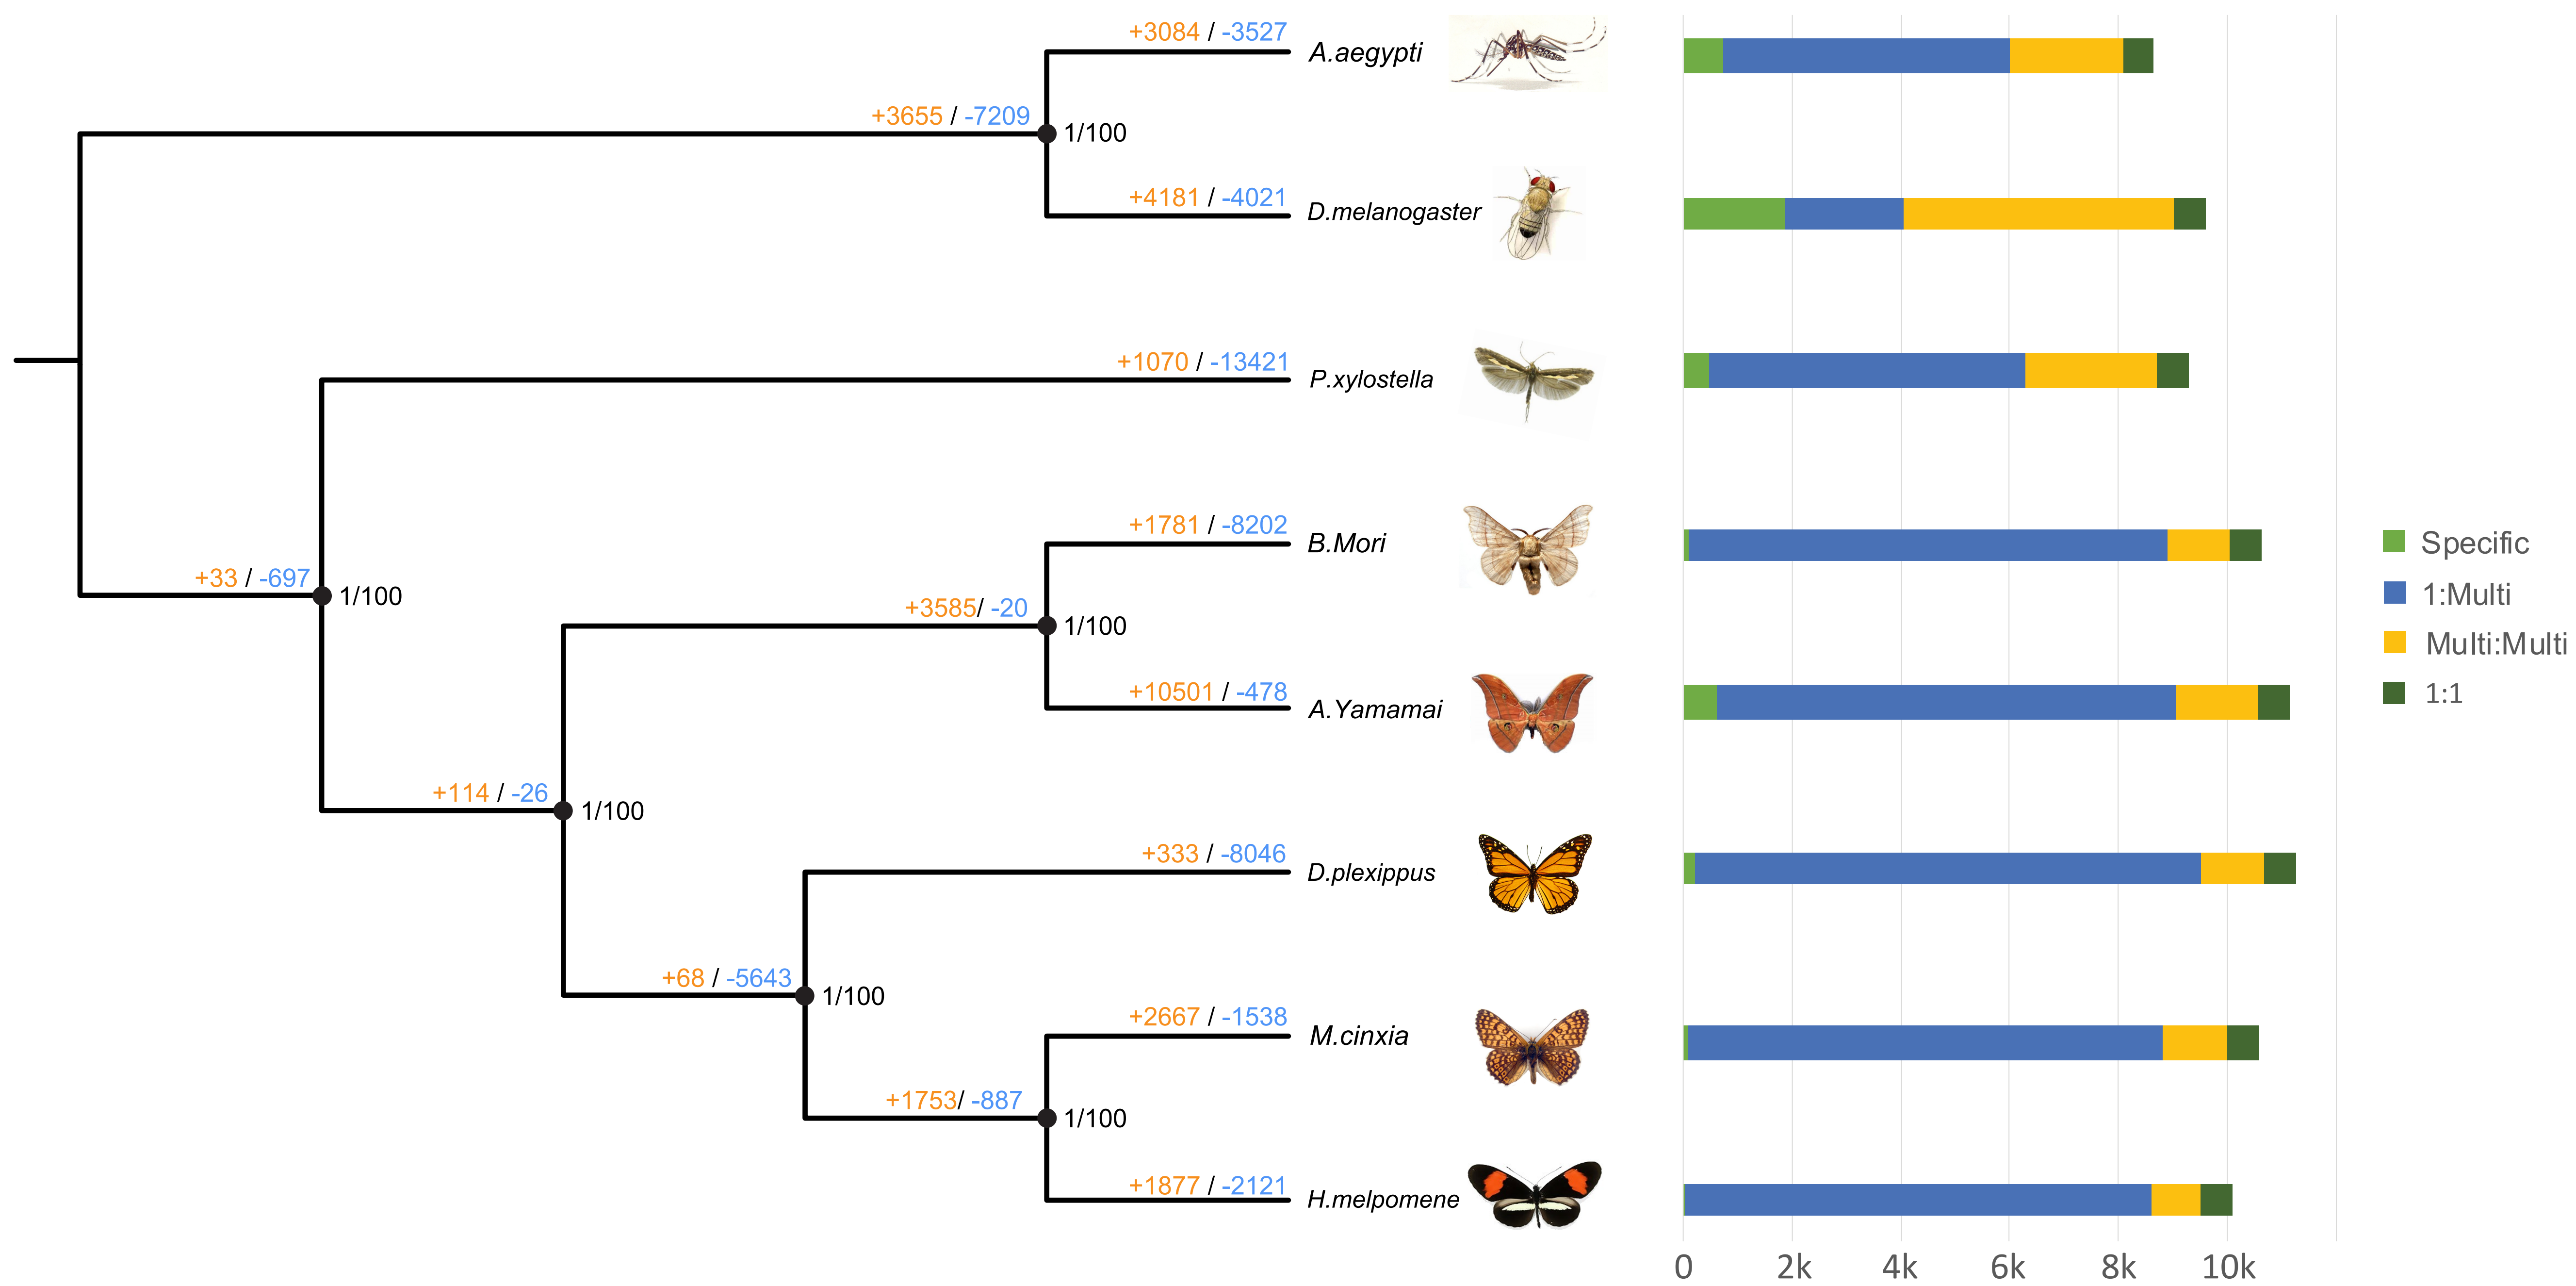

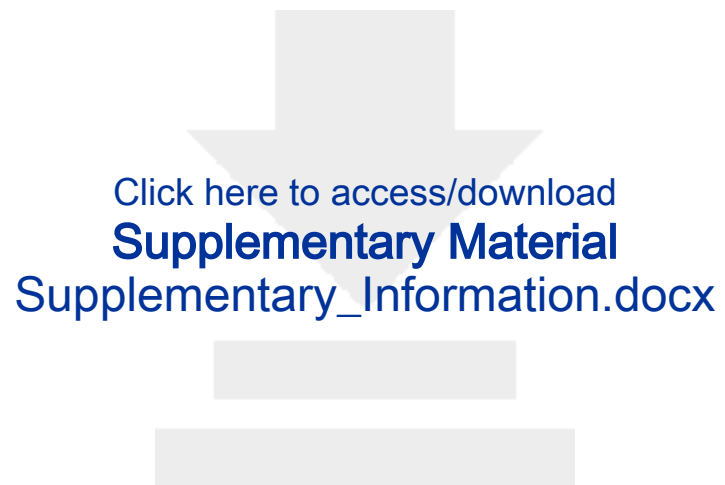

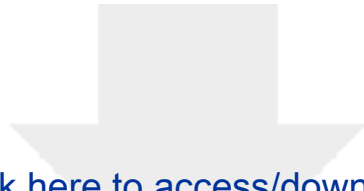

Click here to access/download  
**Supplementary Material**  
Supplementary\_information2.xlsx

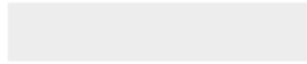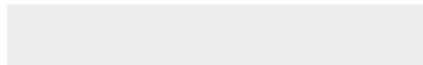

May 22, 2017

Dear Editor of *Gigascience*,

I am pleased to submit our research article entitled “Genome sequence of Japanese oak silk moth, *Antheraea yamamai*: the first draft genome in family Saturniidae”, to your reputed journal, *Gigascience*.

Unlike *Bombyx mori*, few studies have investigated the genomic information for the wild-type silk moth. Wild silk moth, *A. yamamai* and *A. pernyi*, are moth genus belonging to the family Saturniidae and which produce wild silk of commercial importance. In this article, we attempted to the whole-genome sequencing for the *A. yamamai*, thereby we constructed genome of *A. yamamai* were 656 Mb(>2kb) with 3,675 scaffolds and N50 length of assembly was 739 Kb with 34.07% GC ratio. To the best of our knowledge, these results will provide valuable genomic information for understanding the molecular mechanisms related to the specific phenotypes such as wild silk itself, and more insight into Saturniidae phylogeny and genome evolution process.

The material is original research, has not been previously published and has not been submitted for publication elsewhere while under consideration. The authors have declared that they have no conflict of interest.

I hope this paper can meet your approval and can be published at the earliest possible date.

Looking forward to hearing from you again.

Thank you.

With best regards,

Prof. Seung-Won Park

Department of Biotechnology,

Catholic University of Daegu, Gyeongsan-si, Gyeongsangbuk-do 38430, Republic of Korea,

Tel: +82-53-850-3176, E-mail: microsw@cu.ac.kr
