# Supplementary material for: Genome sequence of the Japanese oak silk moth, Antheraea yamamai: the first draft genome in the family Saturniidae
Source: PubMed Central journal article supplement (PMC5774507; doi:10.1093/gigascience/gix113), 2017-11-27
Supplement: gix113_giga-d-17-00085_revision-3.pdf [file gix113_giga-d-17-00085_revision-3.pdf]

## Genome sequence of Japanese oak silk moth, *Antheraea yamamai*: the first draft genome in family Saturniidae --Manuscript Draft--

|                                                      |                                                                                                                                                                                                                                                                                                                                                                                                                                                                                                                                                                                                                                                                                                                                                                                                                                                                                                                                                                                                                                                                                                                                                                                                                                                                                                                                                                                                                                                                                                                                                                                                                                                                                                                                                                                                                                                                                                                                             |                   |
|------------------------------------------------------|---------------------------------------------------------------------------------------------------------------------------------------------------------------------------------------------------------------------------------------------------------------------------------------------------------------------------------------------------------------------------------------------------------------------------------------------------------------------------------------------------------------------------------------------------------------------------------------------------------------------------------------------------------------------------------------------------------------------------------------------------------------------------------------------------------------------------------------------------------------------------------------------------------------------------------------------------------------------------------------------------------------------------------------------------------------------------------------------------------------------------------------------------------------------------------------------------------------------------------------------------------------------------------------------------------------------------------------------------------------------------------------------------------------------------------------------------------------------------------------------------------------------------------------------------------------------------------------------------------------------------------------------------------------------------------------------------------------------------------------------------------------------------------------------------------------------------------------------------------------------------------------------------------------------------------------------|-------------------|
| <b>Manuscript Number:</b>                            | GIGA-D-17-00085R3                                                                                                                                                                                                                                                                                                                                                                                                                                                                                                                                                                                                                                                                                                                                                                                                                                                                                                                                                                                                                                                                                                                                                                                                                                                                                                                                                                                                                                                                                                                                                                                                                                                                                                                                                                                                                                                                                                                           |                   |
| <b>Full Title:</b>                                   | Genome sequence of Japanese oak silk moth, <i>Antheraea yamamai</i> : the first draft genome in family Saturniidae                                                                                                                                                                                                                                                                                                                                                                                                                                                                                                                                                                                                                                                                                                                                                                                                                                                                                                                                                                                                                                                                                                                                                                                                                                                                                                                                                                                                                                                                                                                                                                                                                                                                                                                                                                                                                          |                   |
| <b>Article Type:</b>                                 | Data Note                                                                                                                                                                                                                                                                                                                                                                                                                                                                                                                                                                                                                                                                                                                                                                                                                                                                                                                                                                                                                                                                                                                                                                                                                                                                                                                                                                                                                                                                                                                                                                                                                                                                                                                                                                                                                                                                                                                                   |                   |
| <b>Funding Information:</b>                          | Rural Development Administration (PJ010442)                                                                                                                                                                                                                                                                                                                                                                                                                                                                                                                                                                                                                                                                                                                                                                                                                                                                                                                                                                                                                                                                                                                                                                                                                                                                                                                                                                                                                                                                                                                                                                                                                                                                                                                                                                                                                                                                                                 | Dr Seong-Ryul Kim |
| <b>Abstract:</b>                                     | <p><b>Background</b><br/> <i>Antheraea yamamai</i>, also known as the Japanese oak silk moth, is a wild species of the silk moth. Silk produced by <i>A. yamamai</i>, referred to as tensan silk, shows different characteristics such as thickness, compressive elasticity and chemical resistance compared to the common silk produced from the domesticated silkworm, <i>Bombyx mori</i>. Its unique characteristics have led to its use in many research fields including biotechnology and medical science, and the scientific as well as economic importance of wild silk moth continues to gradually increase. However, no genomic information for wild silk moth, including <i>A. yamamai</i>, is currently available.</p> <p><b>Findings</b><br/>           In order to construct the <i>A. yamamai</i> genome, a total of 147G base pairs using Illumina and Pacbio sequencing platforms were generated, providing 210-fold coverage based on the 700 Mb estimated genome size of <i>A. yamamai</i>. The assembled genome of <i>A. yamamai</i> was 656 Mb(&gt;2kb) with 3,675 scaffolds and the N50 length of assembly was 739 Kb with 34.07% GC ratio. Identified repeat elements covered 37.33% of the total genome and the completeness of the constructed genome assembly was estimated to be 96.7% by BUSCO v2 analysis. A total of 15,481 genes were identified using Evidence Modeler based on the gene prediction results obtained from 3 different methods (ab initio, RNA-seq based, known-gene based) and manual curation.</p> <p><b>Conclusions</b><br/>           Here we present the genome sequence of <i>A. yamamai</i>, the first genome sequence of wild silk moth. These results provide valuable genomic information which will help enrich our understanding of the molecular mechanisms related to not only specific phenotypes such as wild silk itself but also the genomic evolution of Saturniidae.</p> |                   |
| <b>Corresponding Author:</b>                         | Seung-Won Park<br><br>KOREA, REPUBLIC OF                                                                                                                                                                                                                                                                                                                                                                                                                                                                                                                                                                                                                                                                                                                                                                                                                                                                                                                                                                                                                                                                                                                                                                                                                                                                                                                                                                                                                                                                                                                                                                                                                                                                                                                                                                                                                                                                                                    |                   |
| <b>Corresponding Author Secondary Information:</b>   |                                                                                                                                                                                                                                                                                                                                                                                                                                                                                                                                                                                                                                                                                                                                                                                                                                                                                                                                                                                                                                                                                                                                                                                                                                                                                                                                                                                                                                                                                                                                                                                                                                                                                                                                                                                                                                                                                                                                             |                   |
| <b>Corresponding Author's Institution:</b>           |                                                                                                                                                                                                                                                                                                                                                                                                                                                                                                                                                                                                                                                                                                                                                                                                                                                                                                                                                                                                                                                                                                                                                                                                                                                                                                                                                                                                                                                                                                                                                                                                                                                                                                                                                                                                                                                                                                                                             |                   |
| <b>Corresponding Author's Secondary Institution:</b> |                                                                                                                                                                                                                                                                                                                                                                                                                                                                                                                                                                                                                                                                                                                                                                                                                                                                                                                                                                                                                                                                                                                                                                                                                                                                                                                                                                                                                                                                                                                                                                                                                                                                                                                                                                                                                                                                                                                                             |                   |
| <b>First Author:</b>                                 | Seong-Ryul Kim                                                                                                                                                                                                                                                                                                                                                                                                                                                                                                                                                                                                                                                                                                                                                                                                                                                                                                                                                                                                                                                                                                                                                                                                                                                                                                                                                                                                                                                                                                                                                                                                                                                                                                                                                                                                                                                                                                                              |                   |
| <b>First Author Secondary Information:</b>           |                                                                                                                                                                                                                                                                                                                                                                                                                                                                                                                                                                                                                                                                                                                                                                                                                                                                                                                                                                                                                                                                                                                                                                                                                                                                                                                                                                                                                                                                                                                                                                                                                                                                                                                                                                                                                                                                                                                                             |                   |
| <b>Order of Authors:</b>                             | Seong-Ryul Kim                                                                                                                                                                                                                                                                                                                                                                                                                                                                                                                                                                                                                                                                                                                                                                                                                                                                                                                                                                                                                                                                                                                                                                                                                                                                                                                                                                                                                                                                                                                                                                                                                                                                                                                                                                                                                                                                                                                              |                   |
|                                                      | Woori Kwak                                                                                                                                                                                                                                                                                                                                                                                                                                                                                                                                                                                                                                                                                                                                                                                                                                                                                                                                                                                                                                                                                                                                                                                                                                                                                                                                                                                                                                                                                                                                                                                                                                                                                                                                                                                                                                                                                                                                  |                   |
|                                                      | Hyaekang Kim                                                                                                                                                                                                                                                                                                                                                                                                                                                                                                                                                                                                                                                                                                                                                                                                                                                                                                                                                                                                                                                                                                                                                                                                                                                                                                                                                                                                                                                                                                                                                                                                                                                                                                                                                                                                                                                                                                                                |                   |
|                                                      | Kelsey Caetano-Anolles                                                                                                                                                                                                                                                                                                                                                                                                                                                                                                                                                                                                                                                                                                                                                                                                                                                                                                                                                                                                                                                                                                                                                                                                                                                                                                                                                                                                                                                                                                                                                                                                                                                                                                                                                                                                                                                                                                                      |                   |
|                                                      | Kee-Young Kim                                                                                                                                                                                                                                                                                                                                                                                                                                                                                                                                                                                                                                                                                                                                                                                                                                                                                                                                                                                                                                                                                                                                                                                                                                                                                                                                                                                                                                                                                                                                                                                                                                                                                                                                                                                                                                                                                                                               |                   |
|                                                      | Su-Bae Kim                                                                                                                                                                                                                                                                                                                                                                                                                                                                                                                                                                                                                                                                                                                                                                                                                                                                                                                                                                                                                                                                                                                                                                                                                                                                                                                                                                                                                                                                                                                                                                                                                                                                                                                                                                                                                                                                                                                                  |                   |
|                                                      | Kwang-Ho Choi                                                                                                                                                                                                                                                                                                                                                                                                                                                                                                                                                                                                                                                                                                                                                                                                                                                                                                                                                                                                                                                                                                                                                                                                                                                                                                                                                                                                                                                                                                                                                                                                                                                                                                                                                                                                                                                                                                                               |                   |

|                                                                                                                                                                                                                                                                                                                                                                                                                                                                                                                               |                                                        |
|-------------------------------------------------------------------------------------------------------------------------------------------------------------------------------------------------------------------------------------------------------------------------------------------------------------------------------------------------------------------------------------------------------------------------------------------------------------------------------------------------------------------------------|--------------------------------------------------------|
|                                                                                                                                                                                                                                                                                                                                                                                                                                                                                                                               | Seong-Wan Kim                                          |
|                                                                                                                                                                                                                                                                                                                                                                                                                                                                                                                               | Jae-Sam Hwang                                          |
|                                                                                                                                                                                                                                                                                                                                                                                                                                                                                                                               | Min-Jee Kim                                            |
|                                                                                                                                                                                                                                                                                                                                                                                                                                                                                                                               | Iksoo Kim                                              |
|                                                                                                                                                                                                                                                                                                                                                                                                                                                                                                                               | Tae-Won Goo                                            |
|                                                                                                                                                                                                                                                                                                                                                                                                                                                                                                                               | Seung-Won Park                                         |
| <b>Order of Authors Secondary Information:</b>                                                                                                                                                                                                                                                                                                                                                                                                                                                                                |                                                        |
| <b>Response to Reviewers:</b>                                                                                                                                                                                                                                                                                                                                                                                                                                                                                                 | We attached two separated rebuttals for each reviewer. |
| <b>Additional Information:</b>                                                                                                                                                                                                                                                                                                                                                                                                                                                                                                |                                                        |
| <b>Question</b>                                                                                                                                                                                                                                                                                                                                                                                                                                                                                                               | <b>Response</b>                                        |
| Are you submitting this manuscript to a special series or article collection?                                                                                                                                                                                                                                                                                                                                                                                                                                                 | No                                                     |
| <b>Experimental design and statistics</b><br><br>Full details of the experimental design and statistical methods used should be given in the Methods section, as detailed in our <a href="#">Minimum Standards Reporting Checklist</a> . Information essential to interpreting the data presented should be made available in the figure legends.<br><br>Have you included all the information requested in your manuscript?                                                                                                  | Yes                                                    |
| <b>Resources</b><br><br>A description of all resources used, including antibodies, cell lines, animals and software tools, with enough information to allow them to be uniquely identified, should be included in the Methods section. Authors are strongly encouraged to cite <a href="#">Research Resource Identifiers</a> (RRIDs) for antibodies, model organisms and tools, where possible.<br><br>Have you included the information requested as detailed in our <a href="#">Minimum Standards Reporting Checklist</a> ? | Yes                                                    |
| <b>Availability of data and materials</b><br><br>All datasets and code on which the conclusions of the paper rely must be either included in your submission or deposited in <a href="#">publicly available repositories</a> (where available and ethically                                                                                                                                                                                                                                                                   | Yes                                                    |

appropriate), referencing such data using a unique identifier in the references and in the “Availability of Data and Materials” section of your manuscript.

Have you have met the above requirement as detailed in our [Minimum Standards Reporting Checklist?](#)

1 **Genome sequence of Japanese oak silk moth, *Antheraea yamamai*:**  
2  
3  
4 **the first draft genome in family Saturniidae**  
5  
6  
7

8 **Seong-Ryul Kim<sup>1†</sup>, Woori Kwak<sup>2†</sup>, Hyaekang Kim<sup>3</sup>, Kelsey Caetano-Anolles<sup>3</sup>, Kee-Young**  
9 **Kim<sup>1</sup>, Su-Bae Kim<sup>1</sup>, Kwang-Ho Choi<sup>1</sup>, Seong-Wan Kim<sup>1</sup>, Jae-Sam Hwang<sup>1</sup>, Min-Jee**  
10 **Kim<sup>4</sup>, Iksoo Kim<sup>4</sup>, Tae-Won Goo<sup>5</sup> and Seung-Won Park<sup>6\*</sup>**  
11  
12  
13  
14  
15

16 <sup>1</sup>Department of Agricultural Biology, National Academy of Agricultural Science, Rural  
17 Development Administration, Wanju-gun 55365, Republic of Korea; <sup>2</sup>C&K Genomics, Main  
18 Bldg. #420, SNU Research Park, Seoul 151-919, Republic of Korea; <sup>3</sup>Department of  
19 Agricultural Biotechnology and Research Institute of Agriculture and Life Sciences, Seoul  
20 National University, Seoul 151-921, Republic of Korea; <sup>4</sup>College of Agriculture & Life  
21 Sciences, Chonnam National University, Gwangju, Republic of Korea; <sup>5</sup>Department of  
22 Biochemistry, Dongguk University College of Medicine, Gyeongju-si, Gyeongsangbuk-do  
23 38066, Republic of Korea; <sup>6</sup>Department of Biotechnology, Catholic University of Daegu,  
24 Gyeongsan-si, Gyeongsangbuk-do 38430, Republic of Korea  
25  
26  
27  
28  
29  
30  
31  
32  
33  
34  
35  
36  
37  
38  
39  
40  
41

42 Seong-Ryul Kim : [ksr319@korea.kr](mailto:ksr319@korea.kr); Woori Kwak : [asleo@cnkgenomics.com](mailto:asleo@cnkgenomics.com); Hyaekang  
43 Kim : [hkim458@snu.ac.kr](mailto:hkim458@snu.ac.kr); Kelsey Caetano-Anolles : [kelseyca@gmail.com](mailto:kelseyca@gmail.com), ORCID: 0000-  
44 0001-6310-6679; Kee-Young Kim : [applekky@korea.kr](mailto:applekky@korea.kr); Su-Bae Kim : [subae@korea.kr](mailto:subae@korea.kr);  
45 Kwang-Ho Choi : [ckh@korea.kr](mailto:ckh@korea.kr); Seong-Wan; Seong-Wan Kim : [tarupa@korea.kr](mailto:tarupa@korea.kr); Jae-Sam  
46 Hwang : [hwangjs@korea.kr](mailto:hwangjs@korea.kr); Min-Jae Kim : [minjeekim3@gmail.com](mailto:minjeekim3@gmail.com); Iksoo Kim :  
47 [ikkim81@chonnam.ac.kr](mailto:ikkim81@chonnam.ac.kr); Tae-Won Goo : [gootw@dongguk.ac.kr](mailto:gootw@dongguk.ac.kr)  
48  
49  
50  
51  
52  
53  
54  
55  
56  
57

58 † These authors equally contributed and should be regarded as co-first authors.  
59  
60  
61  
62  
63  
64  
65

1 \* Corresponding authors  
2

3 Seung-Won Park  
4

5  
6 Department of Biotechnology,  
7

8  
9 Catholic University of Daegu,  
10

11  
12 Gyeongsan-si, Gyeongsangbuk-do 38430, Republic of Korea  
13

14  
15 Phone : +82-53-850-3176  
16

17  
18 Fax : +82-53-359-6846  
19

20  
21 E-mail: [microsw@cu.ac.kr](mailto:microsw@cu.ac.kr)  
22

23  
24 ORCID: 0000-0002-2218-7748  
25  
26  
27  
28  
29  
30  
31  
32  
33  
34  
35  
36  
37  
38  
39  
40  
41  
42  
43  
44  
45  
46  
47  
48  
49  
50  
51  
52  
53  
54  
55  
56  
57  
58  
59  
60  
61  
62  
63  
64  
65

# Abstract

## Background

*Antheraea yamamai*, also known as the Japanese oak silk moth, is a wild species of silk moth. Silk produced by *A. yamamai*, referred to as *tensan* silk, shows different characteristics such as thickness, compressive elasticity and chemical resistance compared to common silk produced from the domesticated silkworm, *Bombyx mori*. Its unique characteristics have led to its use in many research fields including biotechnology and medical science, and the scientific as well as economic importance of the wild silk moth continues to gradually increase. However, no genomic information for the wild silk moth, including *A. yamamai*, is currently available.

## Findings

In order to construct the *A. yamamai* genome, a total of 147G base pairs using Illumina and Pacbio sequencing platforms were generated, providing 210-fold coverage based on the 700 Mb estimated genome size of *A. yamamai*. The assembled genome of *A. yamamai* was 656 Mb(>2kb) with 3,675 scaffolds and the N50 length of assembly was 739 Kb with a 34.07% GC ratio. Identified repeat elements covered 37.33% of the total genome and the completeness of the constructed genome assembly was estimated to be 96.7% by BUSCO v2 analysis. A total of 15,481 genes were identified using Evidence Modeler based on the gene prediction results obtained from 3 different methods (*ab initio*, RNA-seq based, known-gene based) and manual curation.

## Conclusions

Here we present the genome sequence of *A. yamamai*, the first genome sequence of wild silk moth. These results provide valuable genomic information which will help enrich our

1 24 understanding of the molecular mechanisms relating to not only specific phenotypes such as  
2  
3 25 wild silk itself but also the genomic evolution of Saturniidae.  
4  
5

6 26 **Keywords**  
7  
8

9 27 *Antheraea yamamai*, genome assembly, Japanese silk moth, Japanese oak silk moth, wild  
10  
11 28 silkworm,  
12  
13  
14  
15  
16  
17  
18  
19  
20  
21  
22  
23  
24  
25  
26  
27  
28  
29  
30  
31  
32  
33  
34  
35  
36  
37  
38  
39  
40  
41  
42  
43  
44  
45  
46  
47  
48  
49  
50  
51  
52  
53  
54  
55  
56  
57  
58  
59  
60  
61  
62  
63  
64  
65

## Data description

*Antheraea yamamai* (NCBI Taxonomy ID: 7121), also known as the Japanese oak silk moth, is a wild silk moth species belonging to the Saturniidae family (Figure 1). Silk moths can be categorized into two families- Bombycidae and Saturniidae. Saturniidae has been estimated to contain approximately 1,861 species with 162 genera [1] and is known as the largest family in the Lepidoptera. Among the many species in family Saturniidae, only a few species, including *A. yamamai*, can be utilized for silk production. Previous phylogenetic studies have shown that family Saturniidae shares common ancestors with family Sphingidae, including the hawk moth (*Macroglossum stellatarum*) and Bombycidae family, including the most representative silkworm, *Bombyx mori* [2]. The estimated divergence time between *A. yamamai* and *B. mori* is 84 MYA (million years ago) making it similar to the 88 MYA estimated divergence time between human and mouse [3, 4].

*A. yamamai* produces specific silk, called tensan silk [5], which shows distinctive characteristics compared to common silk from *B. mori*, including characteristics such as thickness, bulkiness, compressive elasticity, and resistance to dyeing chemicals [6-8]. These characteristics have received the attention of researchers as a new biomaterial for use in various fields [9-11]. Additionally, it also has been studied for their applications to human health [12-15]. However, despite the potential importance of the wild silk moth in research and economic fields, no whole genomic information is currently available for this or any other species from the family Saturniidae.

In this study, we present the annotated genome sequence of *A. yamamai*, the first published genome in family Saturniidae, with transcriptome datasets collected from 10 different body organ tissues. This data will be a fundamental resource for future studies and provide more insight into the genome evolution and molecular phylogeny of the family Saturniidae.



## 53 Sequencing

54 For whole genome sequencing, we selected one male sample (Ay-7-male1) from a breeding  
55 line (Ay-7) of *A. yamamai* raised at the National Academy of Agricultural Science, Rural  
56 Development Administration, Korea. In lepidopterans, males are homogametic (ZZ) and  
57 selecting a male sample can reduce the complexity of assembly from excessive repeats on the  
58 W chromosome in females. For genomic library construction, we removed the guts of *A.*  
59 *yamamai* to prevent contamination of genomes from other organisms such as gut microbes  
60 and oak, the main food source of *A. yamamai*. Details of the sample preparation process used  
61 in this study are presented in the supplementary information. Genomic DNA was extracted  
62 using a DNeasy Animal Mini Kit (Qiagen, Hilden, Germany) and the quality of extracted  
63 DNA was checked using trenean, picogreen assay and gel electrophoresis (1% agarose gel/  
64 40ng loading). After quality control processing, we were left with a total of 61.5ug of *A.*  
65 *yamamai* DNA for genome sequencing. Using standard Illumina whole genome shotgun  
66 (WGS) sequencing protocol (paired-end and mate-pair), we added two long read sequencing  
67 platforms, Moleclo (Illumina synthetic long read) and RS II (Pacific Bioscience). Table 1-3  
68 shows a summary of generated data for each library used in this study. RNA-seq libraries  
69 were also constructed for 10 different tissues (Hemocyte, Malpighian tube, Midgut, Fat Body,  
70 Anterior-Middle/Silk gland, Posterior/Silk gland, Head, Integument, Testis, Ovary) with 3  
71 biological replicates following standard manufacturer protocol (Illumina, San Diego, CA,  
72 USA). For this, more than 100 individual *A. yamamai* samples in 5 instar stage from the same  
73 breeding line were used for tissue anatomy and 3 samples from each tissue were selected  
74 based on the quality of extracted RNA. Details of transcriptome library construction are  
75 shown in the supplementary information. Information of libraries and generated data is  
76 provided in Table 4, and a total of 147Gb of genomic data and 76Gb of transcriptomic data

1 77 was generated for this study.  
2  
3

4 78  
5  
6

## 7 79 **Genome assembly and evaluation** 8 9

10  
11 80 Before conducting genome assembly, we conducted k-mer distribution analysis using a  
12  
13 81 350bp paired-end library in order to estimate the size and characteristics of the *A. yamamai*  
14  
15 82 genome. The quality of our generated raw data was checked using FASTQC [16] (FastQC ,  
16  
17 83 RRID:SCR\_014583). Sequencing artifacts such as adapter sequences and low-quality bases  
18  
19 84 were removed using Trimmomatic (Trimmomatic, RRID:SCR\_011848) [17]. Jellyfish [18]  
20  
21 85 was used to count the k-mer frequency for estimation of the genome size of *A. yamamai*.  
22  
23 86 Figure 2 shows the 19-mer distribution of *A. yamamai* genome using a 350bp paired-end  
24  
25 87 library. In the 19-mer distribution, the second peak at approximately half the coverage value  
26  
27 88 (x-axis) of the main peak indicates heterozygosity. Although the inbred line used in this study  
28  
29 89 was the single pair sib-mating maintained for more than 10 generations, high heterozygosity  
30  
31 90 still remains. This phenomenon has been observed in a previous genomic study of the  
32  
33 91 Diamondback moth (*Plutella xylostella*), and sustained heterozygosity as an important  
34  
35 92 genomic characteristic was hypothesized to be a result of environmental adaption [19]. The  
36  
37 93 underlying mechanism of these sustained heterozygosity is unclear, but associative  
38  
39 94 overdominance can be one of the candidate explanation of this phenomenon [20, 21]. Based  
40  
41 95 on the result of 19-mer distribution analysis, the genome size of *A. yamamai* was estimated to  
42  
43 96 be 709Mb. However, this size might be larger than the real genome size of *A.yamamai*  
44  
45 97 because high heterozygosity could affect the estimation of genome size based on the K-mer  
46  
47 98 distribution. Next, we conducted error correction on Illumina paired-end libraries using the  
48  
49 99 error correction module of Allpaths-LG [22] before the initial contig assembly process  
50  
51 100 (ALLPATHS-LG , RRID:SCR\_010742). After error correction, initial contig assembly with  
52  
53  
54  
55  
56  
57  
58  
59  
60  
61  
62  
63  
64  
65

1 101 350bp and 700bp libraries was conducted using SOAP denovo2 [23] with the parameter  
2  
3 102 option set at K=19; this approach showed the best assembly statistics compared to other  
4  
5 103 assemblers and parameters (SOAPdenovo2 , RRID:SCR\_014986). Quality control processing  
6  
7  
8 104 for mate-pair libraries and scaffolding was conducted using Nxtrim [24] and SSPACE  
9  
10 105 (SSPACE , RRID:SCR\_011848) [25], respectively. At each scaffolding step, SOAP  
11  
12 106 Gapcloser [23] with -l 155 and -p 31 parameters was repeatedly used to close the gaps within  
13  
14 107 each scaffold. In order to obtain a higher quality genome assembly of *A. yamamai*, we  
15  
16 108 employed several long read scaffolding strategies using SSPACE-LongRead [26]. First, we  
17  
18 109 used an Illumina synthetic long read sequencing platform called Moleculo which has been  
19  
20 110 proven valuable for the study of highly heterozygous genomes in previous studies [27, 28].  
21  
22 111 After scaffolding was performed using SSPACE-LongRead with Illumina synthetic long read  
23  
24 112 data, the total number of assembled scaffolds was effectively reduced from 398,446 to 24,558.  
25  
26 113 The average scaffold length was also extended from 1.7 Kb to 24.8 Kb. However, there was  
27  
28 114 no impressive improvement in N50 length (approximately 91 Kb to 112 Kb) of assembled  
29  
30 115 scaffolds. Therefore, we employed another type of long read data generated from 10 cells of  
31  
32 116 Pacbio RS II system with P6-C4 chemistry. After final scaffolding processing using Pacbio  
33  
34 117 long reads, the number of scaffolds was reduced to 3,675 and N50 length was effectively  
35  
36 118 extended from 112 Kb to 739 Kb. Summary statistics of the assembled *A. yamamai* genome  
37  
38 119 is provided in Table 5. Final assembly of the *A. yamamai* genome was 656 Mb (>2kb) long  
39  
40 120 with 3,675 scaffolds and the N50 length of assembly was 739 Kb with a 34.07% GC ratio. To  
41  
42 121 evaluate the quality of the assembled genome, we conducted BUSCO (Benchmarking  
43  
44 122 Universal Single-Copy Orthologs) analysis [29] using BUSCO v2.0 with insecta\_odb9  
45  
46 123 including 1,658 BUSCOs from 42 species (BUSCO , RRID:SCR\_015008). From BUSCO  
47  
48 124 analysis, 96.7% of BUSCOs were completely detected in the assembled genome (1,576 :  
49  
50 125 complete and single-copy, 27 : complete and duplicated) among 1,658 tested BUSCOs. The  
51  
52  
53  
54  
55  
56  
57  
58  
59  
60  
61  
62  
63  
64  
65

1 126 number of fragmented and missing BUSCOs was 21 and 34, respectively. Based on the result  
2  
3 127 of BUSCO analysis, the genome of *A.yamamai* presented here was considered properly  
4  
5  
6 128 constructed for downstream analysis.  
7  
8  
9 129

## 130 **Repeat identification and comparative repeat analysis**

131 To identify repeat elements of the *A. yamamai* genome, a custom repeat library was  
132 constructed using RepeatModeler with RECON [30], RepeatScout [31] and TRF [32]. The  
133 resulting constructed custom repeat library for *A. yamamai* was further curated using  
134 CENSOR [33] search and the curated library was employed in RepeatMasker [34] with  
135 Repbase [35]. RepeatMasker (RepeatMasker, RRID:SCR\_012954) was conducted with  
136 RMBlast and ‘no\_is’ option for skipping bacterial insertion element check. Table 6  
137 summarizes the proportion of identified mobile elements in the *A. yamamai* genome. The  
138 most prevalent repeat elements in the *A. yamamai* genome were LINE element (101 Mb,  
139 15.31% of total genome) and total repeat elements accounted for 37.33% of the total genome.  
140 In order to compare the repeat elements of *A. yamamai* with that of other genomes, we  
141 conducted the same process for seven public genomes which are close neighbors of *A.*  
142 *yamamai* - *Aedes aegypti* [36], *Bombyx mori* [37], *Danaus plexippus* [38], *Drosophila*  
143 *melanogaster* [39], *Heliconius Melpomene* [40], *Melitaea cinxia* [41] and *Plutella xylostella*  
144 [19]. Figure 3 displays the amount and proportion of identified repeat elements from the 8  
145 species. Despite the small genome size of *B. mori*, the total amount of identified SINE  
146 element in the *B. mori* genome was 5.77 times larger than that of *A. yamamai*. The top 5  
147 expanded repeat elements in *A. yamamai* genome were DNA/RC, LINE/L2, LINE/RTE-  
148 BovB, DNA/TcMar-Mariner and LINE/CR1. Among these, DNA/TcMar-Mariner was the  
149 specifically expanded repeat element in *A. yamamai* among 8 species. In *B. mori*,

1 150 SINE/tRNA-CR1, LINE/Jockey, DNA/RC, LINE/CR1-Zenon and LINE/RTE-BovB were the  
2  
3 151 top 5 expanded repeat elements. When comparing the repeat elements of *A. yamamai* with  
4  
5  
6 152 those of *B. mori*, which are both producers of the same type of silk, repeat elements showed  
7  
8 153 family and species-specific patterns in the two silk moth lineages. Particularly, we found that  
9  
10 154 the mariner repeat element, which was found specifically expanded in the *A. yamamai*  
11  
12  
13 155 genome, was also included in the fibroin gene. A previous sequencing study also showed that  
14  
15  
16 156 the mariner repeat element was inserted in the 5'-end of fibroin gene of *A. yamamai* [42].  
17  
18 157 Fibroin is the core component of the silk protein found in silk moth, and the physical  
19  
20 158 characteristics of silk mainly depend on the types and unique repeat motif of the fibroin [43].  
21  
22  
23 159 This gene is known to have hundreds of tandem repeat motifs and these kinds of tandem  
24  
25 160 repeats can be derived through transposable elements. This indicates that the mariner repeat  
26  
27  
28 161 element, specifically expanded in the *A. yamamai* genome, may play an important role in  
29  
30 162 development of the unique silk of *A. yamamai*, and the lineage-specific repeat elements may  
31  
32  
33 163 be one of the candidate evolution forces related to host-specific phenotype during genome  
34  
35 164 evolution.

## 36 37 38 165 39 40 41 42 166 **Gene prediction and annotation**

43  
44  
45 167 Three different algorithms were used for gene prediction of the *A. yamamai* genome: *ab initio*,  
46  
47  
48 168 RNA-seq transcript based, and protein homology-based approaches. For *ab initio* gene  
49  
50  
51 169 prediction, Augustus (Augustus: Gene Prediction, RRID:SCR\_008417)[44], Geneid [45] and  
52  
53  
54 170 GeneMarks-ET [46] were employed. Augustus was trained using known genes of *A. yamamai*  
55  
56 171 in NCBI database and mapping information of RNA-seq data obtained from Tophat [47]  
57  
58 172 (TopHat , RRID:SCR\_013035) was also utilized for gene prediction. Geneid was used with  
59  
60  
61  
62  
63  
64  
65

1 173 predefined parameters for *Drosophila melanogaster*. GeneMarks-ET was employed using  
2  
3 174 junction information of genes from transcriptome data alignment. For RNA-seq transcript  
4  
5  
6 175 based prediction, generated transcriptome data from ten organ tissues of *A. yamamai* were  
7  
8 176 aligned to the assembled genome and gene information was predicted using Cufflinks [48]  
9  
10  
11 177 (Cufflinks , RRID:SCR\_014597). The longest CDS sequences were identified from Cufflinks  
12  
13 178 results using Transdecoder. For the homology-based approach, all known genes of order  
14  
15  
16 179 Lepidoptera in the NCBI database were aligned using PASA [49]. Table 7 shows the gene  
17  
18 180 prediction results from each method. Gene prediction results from different prediction  
19  
20  
21 181 algorithms were combined using EVM (Evidence Modeler) [50] and a consensus gene set of  
22  
23 182 the *A. yamamai* genome was created. Manual curation was performed based on the 5  
24  
25 183 evidences (3 in-silico, known protein and RNA-seq) using IGV [51] and Blastp (BLASTP,  
26  
27  
28 184 RRID:SCR\_001010). Using IGV with each gene evidence and comparing results with known  
29  
30  
31 185 genes via blastp, we mainly focused on the removing false positively predicted genes which  
32  
33 186 don't have enough evidences. And merged and spliced gene structured were corrected by  
34  
35 187 comparing the gene structure with known exon structure in NCBI NR database. In addition,  
36  
37  
38 188 fibroin and sericin genes which couldn't be properly predicted because of its high repeat  
39  
40 189 motif were also manually identified with previously known sequences [42, 52] with RNA-seq  
41  
42  
43 190 data. The final gene set of *A. yamamai* genome contains 15,481 genes. Summary statistics for  
44  
45 191 the consensus gene set is provided in Table 8. The average gene length was 11,016.34 bp with  
46  
47  
48 192 a 34.38% GC ratio and the number of exons per gene was 5.64. In order to identify the  
49  
50 193 function of predicted genes in *A. yamamai*, three non-redundant sequence databases (Swiss-  
51  
52 194 Prot [53], Uniref100 [53], and NCBI NR [54]) as well as the gene information of two species  
53  
54  
55 195 (*B. mori* and *D. melanogaster*) were used for target databases using Blastp. Additionally,  
56  
57 196 protein domain searches were conducted on the consensus gene set using InterproScan5  
58  
59  
60 197 (InterProScan, RRID:SCR\_005829) [55]. Figure S1 shows the top 20 identified terms from 7  
61  
62  
63  
64  
65

1 198 different InterproScan5 analyses. Among the various analysis conducted using InterproScan5,  
2  
3 199 gene ontology analysis with Pfam database showed that a large proportion of genes in the  
4  
5 200 *A.yamamai* genome were related with the function of molecular binding, catalytic activity,  
6  
7  
8 201 internal component of membrane, metabolic process, oxidation-reduction process and  
9  
10 202 transmembrane transport.  
11  
12  
13  
14 203  
15  
16  
17

## 18 204 **Comparative genome analysis**

19  
20  
21

22 205 We used OrthoMCL [56] and RBH(Reciprocal Best Hit) within blastp for identification of  
23  
24 206 gene family clusters and 1:1 orthologous gene sets. Gene information of 7 taxa (*A. aegypti*, *B.*  
25  
26 207 *mori*, *D. plexippus*, *D. melanogaster*, *H. melpomene*, *M. cinxia* and *P. xylostella*), same taxa  
27  
28  
29 208 used in repeat analysis, was employed for OrthoMCL with *A. yamamai*. A total of 17,406  
30  
31 209 gene family clusters were constructed and 3,586 1:1 orthologous genes were identified.  
32  
33  
34 210 Before conducting comparative genome analysis, we constructed phylogenetic trees for the 8  
35  
36 211 species. In order to build the phylogenetic tree, multiple sequence alignment for the 1:1  
37  
38  
39 212 orthologous genes of all 8 species was conducted using PRANK [57], and Gblocks [58] was  
40  
41 213 used to obtain conserved blocks for the phylogenetic tree. Conserved block sequences were  
42  
43  
44 214 sequentially concatenated to obtain one consensus sequence for each species. MEGA [59]  
45  
46 215 was used for constructing Neighbor-Joining Trees (bootstrap 1000, maximum composite  
47  
48 216 likelihood, transitions + transversions, and gamma distributed option) and MrBayes  
49  
50  
51 217 (MrBayes, RRID:SCR\_012067) [60] was employed for the construction of Bayesian  
52  
53 218 inference trees. To select the best evolution model for our data, Modeltest [61] was conducted  
54  
55  
56 219 and the GTR based invariant model was chosen based on the AIC value of Modeltest. Figure  
57  
58 220 4 shows the constructed phylogenetic tree of the 8 species using 3,586 orthologous genes.  
59  
60  
61  
62  
63  
64  
65

1 221 The bootstrap value and Bayesian poster probability value of all nodes were 100 and 1,  
2  
3 222 respectively. The closest neighbor of *A. yamamai* was *B. mori*, which is included in  
4  
5  
6 223 Bombycidae family; this result is consistent with that of previous studies. Three butterfly  
7  
8 224 species (*D. plexippus*, *M. cinxia* and *H. meplmene*) included in Nymphalidae family were  
9  
10  
11 225 also shown to share a common ancestor with families Saturniidae and Bombycidae.

12  
13  
14 226 Based on the constructed phylogenetic tree, gene family expansion and contraction analysis  
15  
16 227 was conducted using a 2 parameter model in CAFÉ [62] and the gene tree was constructed  
17  
18 228 using protein sequence via MEGA [59]. Figure 4 shows the result of gene family expansion  
19  
20  
21 229 and contraction analysis of 8 species. 938 and 1,987 gene families of *A. yamamai* and 567  
22  
23 230 and 715 gene families of *B. mori* were estimated to be expanded and contracted from the  
24  
25  
26 231 common ancestors, respectively. Among these, 15 gene families in *A. yamamai* were  
27  
28 232 estimated to be under rapid expansion during the evolution process. Functions of genes in  
29  
30  
31 233 rapidly expanded gene families of *A. yamamai* were transposase, fatty acid synthase, zinc  
32  
33 234 finger protein, chorion (eggshell protein), reverse transcriptase, prostaglandin dehydrogenase,  
34  
35  
36 235 RNA-directed DNA polymerase, gag like protein, juvenile hormone acid methyltransferase,  
37  
38 236 facilitated trehalose transporter and glucose dehydrogenase. Figure 5 shows the gene tree of  
39  
40  
41 237 two chorion gene (chorion class A and B) family clusters rapidly expanded in the *A. yamamai*  
42  
43 238 genome. Chorion, called eggshell protein, composes the surface of egg and protects the  
44  
45  
46 239 embryo from environmental threats such as desiccation, flooding, freezing, infection of  
47  
48 240 microorganisms, and physical destruction. It also provides channels, such as aeropyle, which  
49  
50  
51 241 enables gas exchange and maintains proper condition for diapause egg [63]. These diverse  
52  
53 242 functions of eggshell are implemented by the specific eggshell structure and the surface  
54  
55 243 structure of eggshell varies between species for the adaptation in a different environment. The  
56  
57  
58 244 ancestor of *Antheraea* has the unique aeropyle structure called “aerophyle crown” on the  
59  
60 245 eggshell surface [64]. This unique structure is formed by the circular vertical projection of  
61  
62  
63  
64  
65



1 246 lamellar chorion from follicle cell and it surrounds the aeropyles near the end of oogenesis  
2  
3 247 [65]. Acquiring this kind of *de novo* complex structure requires numerous genetic changes  
4  
5  
6 248 and a previous study about *Antheraea Polyphemus* has shown that over a hundred chorion  
7  
8 249 specific polypeptides were involved for this unique ultra-structure [65]. Therefore, the  
9  
10  
11 250 specific rapid expansion of chorion class A and B gene family in *A. yamamai* genome might  
12  
13 251 be one of the convincing molecular explanation for acquiring this unique ultrastructure in the  
14  
15  
16 252 eggshell surface of *Antheraea* genus. However, this unique ultra-structure tends to be reduced  
17  
18 253 during current evolution process of the *Antheraea* genus. Types of eggshell structure in  
19  
20  
21 254 *Antheraea* genus can be categorized into multiple classes based on the morphology and  
22  
23 255 regional distribution of aeropyle [64]. The shape of aeropyle in *A. yamamai* egg is known to  
24  
25 256 be converted to mound shape from the crown shape and these aeropyle mounds only exist in  
26  
27  
28 257 the narrow band surrounding the micropyle region [64]. Only a very few, small aeropyle  
29  
30 258 crowns remained and it is entirely different with the ancestral form of eggshell surface mostly  
31  
32  
33 259 covered by aeropyle crowns. These regional differences were known to be adjusted by  
34  
35 260 regional difference of filler genes during choriogenesis [66] and the additional regulations of  
36  
37  
38 261 related genes for choriogenesis have to be considered. This indicates that specifically  
39  
40 262 expanded chorion gene families of *A. yamamai* may be one of the remaining evolutionary  
41  
42 263 tracks in the genome of *Antheraea* genus. However, further functional studies must be  
43  
44  
45 264 conducted to resolve the limited understanding about the relationship between these  
46  
47 265 expanded chorion gene families and the current eggshell surface formation of *A. yamamai*.

48  
49  
50 266 The constructed genome of *A.yamamai* presented here is the first announced genome in  
51  
52 267 family Saturniidae and the karyotyping analysis using gamete in metaphase showed that the  
53  
54  
55 268 genome of *A. yamamai* consists of 31 chromosomes (Figure 6). This constructed genome  
56  
57  
58 269 information provides more insight into the genome evolution and phylogeny of family  
59  
60 270 Saturniidae, which contains the largest number of species in Lepidoptera. For example,  
61  
62  
63  
64  
65

1 271 although two silk moths, *A. yamamai* and *B. mori*, appear similar, comparative genome  
2  
3  
4 272 analysis showed the significant differences in the genome size, specific expansion of repeat  
5  
6 273 elements and gene families between families Saturniidae and Bombycidae. In case of  
7  
8 274 molecular phylogeny, most previous phylogenetic studies were limited to few genes due to  
9  
10  
11 275 the lack of genomic information on family Saturniidae. We expect our study and resulting  
12  
13 276 constructed genome will resolve some limitations of molecular phylogenetic and ecological  
14  
15 277 research on Saturniidae species. Additionally, constructed genome information will help  
16  
17  
18 278 researchers better understand the molecular background of wild silk and its production. Silk  
19  
20  
21 279 produced by *A. yamamai*, referred to as *tensan* silk, shows unique characteristics which have  
22  
23 280 made it valuable in various fields. However, *A. yamamai* has not been completely  
24  
25 281 domesticated compared to *B. mori*, making mass production of *tensan* silk infeasible.  
26  
27  
28 282 Understanding of the molecular mechanisms behind the *tensan* silk production process is  
29  
30 283 essential for mass production using biotechnology, and this genome sequence with manually  
31  
32 284 curated gene information is a fundamental resource for related research and industrial  
33  
34  
35 285 improvement. Additionally, the transcriptome data of 10 different organ tissues with 3  
36  
37 286 biological replications presented here may be also useful resources for uncovering the  
38  
39  
40 287 molecular mechanisms related to specific phenotypes of *A.yamamai* and family Saturniidae.  
41  
42  
43  
44  
45  
46  
47  
48  
49  
50  
51  
52  
53  
54  
55  
56  
57  
58  
59  
60  
61  
62  
63  
64  
65

## 288 **Availability of supporting data**

289 The generated genome sequence and gene information of *A. yamamai* are available in  
290 GigaDB [67] and generated raw data is available under project accession PRJNA383008 and  
291 PRJNA383025 of the NCBI database.

## 292 **Competing interests**

293 All authors report no competing interests.

## 294 **Abbreviation**

295 RBH – Reciprocal Best Hit

## 296 **Authors contributions**

297 Sampling - Kee-Young Kim, Su-Bae Kim

298 Sequencing - Kwang-Ho Choi, Seong-Wan Kim

299 Genome assembly - Seong-Ryul Kim, Woori Kwak, Jae-Sam Hwang, Seung-Won Park

300 Repeat element analysis - Seong-Ryul Kim, Woori Kwak, Seung-Won Park

301 Gene prediction - Seong-Ryul Kim, Woori Kwak, Hyaekang Kim, Jae-Sam Hwang

302 Comparative genome analysis - Seong-Ryul Kim, Woori Kwak, Min-Jae Kim, Kelsey

303 Caetano-Anolles

304 Funding and experimental design - Seong-Ryul Kim, Seung-Won Park

305

1 306 **Acknowledgements**

2  
3  
4 307 This work was supported by a grant from the Rural Development Administration, Republic of  
5  
6 308 Korea (grant no. PJ010442).

7  
8  
9  
10  
11  
12  
13  
14  
15  
16  
17  
18  
19  
20  
21  
22  
23  
24  
25  
26  
27  
28  
29  
30  
31  
32  
33  
34  
35  
36  
37  
38  
39  
40  
41  
42  
43  
44  
45  
46  
47  
48  
49  
50  
51  
52  
53  
54  
55  
56  
57  
58  
59  
60  
61  
62  
63  
64  
65

## References

1. Regier, J.C., M.C. Grant, C. Mitter, et al., *Phylogenetic relationships of wild silkmoths (Lepidoptera: Saturniidae) inferred from four protein-coding nuclear genes*. Systematic Entomology, 2008. **33**(2): p. 219-228.
2. Regier, J.C., C. Mitter, A. Zwick, et al., *A large-scale, higher-level, molecular phylogenetic study of the insect order Lepidoptera (moths and butterflies)*. PLoS One, 2013. **8**(3): p. e58568.
3. Hedges, S.B., J. Dudley, and S. Kumar, *TimeTree: a public knowledge-base of divergence times among organisms*. Bioinformatics, 2006. **22**(23): p. 2971-2972.
4. Kawahara, A.Y. and J.R. Barber, *Tempo and mode of antibat ultrasound production and sonar jamming in the diverse hawkmoth radiation*. Proceedings of the National Academy of Sciences, 2015. **112**(20): p. 6407-6412.
5. Peigler, R.S., *Wild silks of the world*. American Entomologist, 1993. **39**(3): p. 151-162.
6. MATSUMOTO, Y.-I. and H. SAITO, *Load-extension characteristics of composite raw silk of *Antheraea yamamai* and *Bombyx mori**. The Journal of Sericultural Science of Japan, 1997. **66**(6): p. 497-501.
7. Nakamura, S., Y. Saegusa, Y. Yamaguchi, et al., *Physical properties and structure of silk. XI. Glass transition temperature of wild silk fibroins*. Journal of applied polymer science, 1986. **31**(3): p. 955-956.
8. Kweon, H. and Y. Park, *Structural characteristics and physical properties of wild silk fibres: *Antheraea pernyi* and *Antheraea yamamai**. Korean Journal of Sericultural Science (Korea Republic), 1994.
9. Zheng, Z., Y. Wei, S. Yan, et al., *Preparation of regenerated *Antheraea yamamai* silk fibroin film and controlled-molecular conformation changes by aqueous ethanol treatment*. Journal of applied polymer science, 2010. **116**(1): p. 461-467.
10. Omenetto, F., D. Kaplan, J. Amsden, et al., *Silk based biophotonic sensors*. 2011, Google Patents.
11. Takeda, S., *New field of insect science: Research on the use of insect properties*. Entomological Science, 2013. **16**(2): p. 125-135.
12. Omenetto, F. and D.L. Kaplan, *Silk-based multifunctional biomedical platform*. 2012, Google Patents.
13. Serban, M.A., *Silk medical devices*. 2016, Google Patents.
14. Jiang, G.-L., A.L. Collette, R.L. Horan, et al., *Drug delivery platforms comprising silk fibroin hydrogels and uses thereof*. 2010, Google Patents.
15. Kamiya, M., K. Oyauchi, Y. Sato, et al., *Structure-activity relationship of a novel pentapeptide with cancer cell growth-inhibitory activity*. Journal of Peptide Science, 2010. **16**(5): p. 242-248.
16. Bioinformatics, B., *FastQC A quality control tool for high throughput sequence data*.

- 1 Cambridge, UK: Babraham Institute, 2011.
- 2
- 3 17. Bolger, A.M., M. Lohse, and B. Usadel, *Trimmomatic: a flexible trimmer for Illumina*
- 4 *sequence data*. Bioinformatics, 2014: p. btu170.
- 5
- 6 18. Marçais, G. and C. Kingsford, *A fast, lock-free approach for efficient parallel counting of*
- 7 *occurrences of k-mers*. Bioinformatics, 2011. **27**(6): p. 764-770.
- 8
- 9 19. You, M., Z. Yue, W. He, et al., *A heterozygous moth genome provides insights into*
- 10 *herbivory and detoxification*. Nature genetics, 2013. **45**(2): p. 220-225.
- 11
- 12 20. Maruyama, T. and M. Nei, *Genetic variability maintained by mutation and overdominant*
- 13 *selection in finite populations*. Genetics, 1981. **98**(2): p. 441-459.
- 14
- 15 21. Pamilo, P. and S. Pálsson, *Associative overdominance, heterozygosity and fitness*. Heredity,
- 16 1998. **81**(4): p. 381-389.
- 17
- 18 22. Gnerre, S., I. MacCallum, D. Przybylski, et al., *High-quality draft assemblies of mammalian*
- 19 *genomes from massively parallel sequence data*. Proceedings of the National Academy of
- 20 Sciences, 2011. **108**(4): p. 1513-1518.
- 21
- 22 23. Luo, R., B. Liu, Y. Xie, et al., *SOAPdenovo2: an empirically improved memory-efficient*
- 23 *short-read de novo assembler*. Gigascience, 2012. **1**(1): p. 18.
- 24
- 25 24. O'Connell, J., O. Schulz-Trieglaff, E. Carlson, et al., *NxTrim: optimized trimming of Illumina*
- 26 *mate pair reads*. Bioinformatics, 2015. **31**(12): p. 2035-2037.
- 27
- 28 25. Boetzer, M., C.V. Henkel, H.J. Jansen, et al., *Scaffolding pre-assembled contigs using*
- 29 *SSPACE*. Bioinformatics, 2011. **27**(4): p. 578-579.
- 30
- 31 26. Boetzer, M. and W. Pirovano, *SSPACE-LongRead: scaffolding bacterial draft genomes using*
- 32 *long read sequence information*. BMC bioinformatics, 2014. **15**(1): p. 211.
- 33
- 34 27. Voskoboynik, A., N.F. Neff, D. Sahoo, et al., *The genome sequence of the colonial chordate,*
- 35 *Botryllus schlosseri*. Elife, 2013. **2**: p. e00569.
- 36
- 37 28. McCoy, R.C., R.W. Taylor, T.A. Blauwkamp, et al., *Illumina TruSeq synthetic long-reads*
- 38 *empower de novo assembly and resolve complex, highly-repetitive transposable elements*.
- 39 *PloS one*, 2014. **9**(9): p. e106689.
- 40
- 41 29. Simão, F.A., R.M. Waterhouse, P. Ioannidis, et al., *BUSCO: assessing genome assembly and*
- 42 *annotation completeness with single-copy orthologs*. Bioinformatics, 2015: p. btv351.
- 43
- 44 30. Bao, Z. and S.R. Eddy, *Automated de novo identification of repeat sequence families in*
- 45 *sequenced genomes*. Genome Research, 2002. **12**(8): p. 1269-1276.
- 46
- 47 31. Price, A.L., N.C. Jones, and P.A. Pevzner, *De novo identification of repeat families in large*
- 48 *genomes*. Bioinformatics, 2005. **21**(suppl 1): p. i351-i358.
- 49
- 50 32. Benson, G., *Tandem repeats finder: a program to analyze DNA sequences*. Nucleic acids
- 51 *research*, 1999. **27**(2): p. 573.
- 52
- 53 33. Kohany, O., A.J. Gentles, L. Hankus, et al., *Annotation, submission and screening of*
- 54 *repetitive elements in Repbase: RepbaseSubmitter and Censor*. BMC bioinformatics, 2006.
- 55 **7**(1): p. 474.
- 56
- 57 34. Tarailo-Graovac, M. and N. Chen, *Using RepeatMasker to identify repetitive elements in*
- 58
- 59
- 60
- 61
- 62
- 63
- 64
- 65

- 1 *genomic sequences*. Current Protocols in Bioinformatics, 2009: p. 4.10. 1-4.10. 14.
- 2
- 3 35. Bao, W., K.K. Kojima, and O. Kohany, *Rebase Update, a database of repetitive elements in*
- 4 *eukaryotic genomes*. Mobile DNA, 2015. **6**(1): p. 11.
- 5
- 6 36. Nene, V., J.R. Wortman, D. Lawson, et al., *Genome sequence of Aedes aegypti, a major*
- 7 *arbovirus vector*. Science, 2007. **316**(5832): p. 1718-1723.
- 8
- 9 37. Xia, Q., Z. Zhou, C. Lu, et al., *A draft sequence for the genome of the domesticated*
- 10 *silkworm (Bombyx mori)*. Science, 2004. **306**(5703): p. 1937-1940.
- 11
- 12 38. Zhan, S., C. Merlin, J.L. Boore, et al., *The monarch butterfly genome yields insights into*
- 13 *long-distance migration*. Cell, 2011. **147**(5): p. 1171-1185.
- 14
- 15 39. Adams, M.D., S.E. Celniker, R.A. Holt, et al., *The genome sequence of Drosophila*
- 16 *melanogaster*. Science, 2000. **287**(5461): p. 2185-2195.
- 17
- 18 40. Consortium, H.G., *Butterfly genome reveals promiscuous exchange of mimicry adaptations*
- 19 *among species*. Nature, 2012. **487**(7405): p. 94-98.
- 20
- 21 41. Ahola, V., R. Lehtonen, P. Somervuo, et al., *The Glanville fritillary genome retains an ancient*
- 22 *karyotype and reveals selective chromosomal fusions in Lepidoptera*. Nature
- 23 *communications*, 2014. **5**.
- 24
- 25 42. Hwang, J.-S., J.-S. Lee, T.-W. Goo, et al., *Cloning of the fibroin gene from the oak silkworm,*
- 26 *Antheraea yamamai and its complete sequence*. Biotechnology letters, 2001. **23**(16): p.
- 27 1321-1326.
- 28
- 29 43. Malay, A.D., R. Sato, K. Yazawa, et al., *Relationships between physical properties and*
- 30 *sequence in silkworm silks*. Scientific reports, 2016. **6**: p. 27573.
- 31
- 32 44. Stanke, M., M. Diekhans, R. Baertsch, et al., *Using native and syntenically mapped cDNA*
- 33 *alignments to improve de novo gene finding*. Bioinformatics, 2008. **24**(5): p. 637-644.
- 34
- 35 45. Blanco, E., G. Parra, and R. Guigó, *Using geneid to identify genes*. Current protocols in
- 36 *bioinformatics*, 2007: p. 4.3. 1-4.3. 28.
- 37
- 38 46. Lomsadze, A., P.D. Burns, and M. Borodovsky, *Integration of mapped RNA-Seq reads into*
- 39 *automatic training of eukaryotic gene finding algorithm*. Nucleic acids research, 2014: p.
- 40 gku557.
- 41
- 42 47. Trapnell, C., L. Pachter, and S.L. Salzberg, *TopHat: discovering splice junctions with RNA-*
- 43 *Seq*. Bioinformatics, 2009. **25**(9): p. 1105-1111.
- 44
- 45 48. Trapnell, C., A. Roberts, L. Goff, et al., *Differential gene and transcript expression analysis of*
- 46 *RNA-seq experiments with TopHat and Cufflinks*. Nature protocols, 2012. **7**(3): p. 562-578.
- 47
- 48 49. Campbell, M.A., B.J. Haas, J.P. Hamilton, et al., *Comprehensive analysis of alternative*
- 49 *splicing in rice and comparative analyses with Arabidopsis*. BMC genomics, 2006. **7**(1): p.
- 50 327.
- 51
- 52 50. Haas, B.J., S.L. Salzberg, W. Zhu, et al., *Automated eukaryotic gene structure annotation*
- 53 *using EVIDENCEModeler and the Program to Assemble Spliced Alignments*. Genome
- 54 *biology*, 2008. **9**(1): p. R7.
- 55
- 56 51. Robinson, J.T., H. Thorvaldsdóttir, W. Winckler, et al., *Integrative genomics viewer*. Nature
- 57
- 58
- 59
- 60
- 61
- 62
- 63
- 64
- 65

- 1 biotechnology, 2011. **29**(1): p. 24-26.
- 2
- 3 52. Zurovec, M., N. Yonemura, B. Kludkiewicz, et al., *Sericin Composition in the Silk of*
- 4 *Antheraea yamamai*. *Biomacromolecules*, 2016. **17**(5): p. 1776-1787.
- 5
- 6 53. Consortium, U., *Reorganizing the protein space at the Universal Protein Resource (UniProt)*.
- 7 *Nucleic acids research*, 2011: p. gkr981.
- 8
- 9 54. Pruitt, K.D., T. Tatusova, and D.R. Maglott, *NCBI reference sequences (RefSeq): a curated*
- 10 *non-redundant sequence database of genomes, transcripts and proteins*. *Nucleic acids*
- 11 *research*, 2007. **35**(suppl 1): p. D61-D65.
- 12
- 13 55. Jones, P., D. Binns, H.-Y. Chang, et al., *InterProScan 5: genome-scale protein function*
- 14 *classification*. *Bioinformatics*, 2014. **30**(9): p. 1236-1240.
- 15
- 16 56. Li, L., C.J. Stoeckert, and D.S. Roos, *OrthoMCL: identification of ortholog groups for*
- 17 *eukaryotic genomes*. *Genome research*, 2003. **13**(9): p. 2178-2189.
- 18
- 19 57. Löytynoja, A. and N. Goldman, *An algorithm for progressive multiple alignment of*
- 20 *sequences with insertions*. *Proceedings of the National Academy of Sciences of the United*
- 21 *States of America*, 2005. **102**(30): p. 10557.
- 22
- 23 58. Castresana, J., *Selection of conserved blocks from multiple alignments for their use in*
- 24 *phylogenetic analysis*. *Molecular biology and evolution*, 2000. **17**(4): p. 540-552.
- 25
- 26 59. Kumar, S., G. Stecher, and K. Tamura, *MEGA7: Molecular Evolutionary Genetics Analysis*
- 27 *version 7.0 for bigger datasets*. *Molecular biology and evolution*, 2016. **33**(7): p. 1870-1874.
- 28
- 29 60. Ronquist, F. and J.P. Huelsenbeck, *MrBayes 3: Bayesian phylogenetic inference under mixed*
- 30 *models*. *Bioinformatics*, 2003. **19**(12): p. 1572-1574.
- 31
- 32 61. Posada, D., *Using MODELTEST and PAUP\* to select a model of nucleotide substitution*.
- 33 *Current protocols in bioinformatics*, 2003: p. 6.5. 1-6.5. 14.
- 34
- 35 62. De Bie, T., N. Cristianini, J.P. Demuth, et al., *CAFE: a computational tool for the study of*
- 36 *gene family evolution*. *Bioinformatics*, 2006. **22**(10): p. 1269-1271.
- 37
- 38 63. Chapman, R.F., *The insects: structure and function*. 1998: Cambridge university press.
- 39
- 40 64. Regier, J.C., U. Paukstadt, L.H. Paukstadt, et al., *Phylogenetics of eggshell morphogenesis in*
- 41 *Antheraea (Lepidoptera: Saturniidae): unique origin and repeated reduction of the*
- 42 *aeropyle crown*. *Systematic biology*, 2005. **54**(2): p. 254-267.
- 43
- 44 65. Regier, J.C., G.D. Mazur, and F.C. Kafatos, *The silkmoth chorion: morphological and*
- 45 *biochemical characterization of four surface regions*. *Developmental biology*, 1980. **76**(2): p.
- 46 286-304.
- 47
- 48 66. Hatzopoulos, A.K. and J.C. Regier, *Evolutionary changes in the developmental expression of*
- 49 *silkmoth chorion genes and their morphological consequences*. *Proceedings of the*
- 50 *National Academy of Sciences*, 1987. **84**(2): p. 479-483.
- 51
- 52 67. Kim, S; Kwak, W; Kim, K; Kim, S; Choi, K; Kim, S; Hwang, J; Kim, I; Goo, T; Park, S (2017):
- 53 *The Japanese silk moth, Antheraea yamamai, draft genome sequence* GigaScience
- 54 *Database*. <http://dx.doi.org/10.5524/100382>
- 55
- 56
- 57
- 58
- 59
- 60
- 61
- 62
- 63
- 64
- 65



16  
17  
18  
19  
20  
21  
22  
23  
24  
25  
26  
27  
28  
29  
30  
31  
32  
33  
34  
35  
36  
37  
38  
39  
40  
41  
42  
43  
44  
45  
46  
47  
48  
49  
50  
51  
52  
53  
54  
55  
56  
57  
58  
59  
60  
61  
62  
63  
64  
65

## Tables

Table 1. Summary statistics of generated whole genome shotgun sequencing data using Illumina Nextseq 500.

| <b>Library Name</b> | <b>Library Type</b> | <b>Insert Size</b> | <b>Platform</b> | <b>Read Length</b> | <b>No. Reads</b> | <b>Total Base(bp)</b> | <b>Reads retained after trimming</b> |
|---------------------|---------------------|--------------------|-----------------|--------------------|------------------|-----------------------|--------------------------------------|
| 350bp               | Paired-end          | 350bp              | Nextseq500      | 151                | 293,176,268      | 44,269,616,468        | 291,070,362                          |
| 700bp               | Paired-end          | 700bp              | Nextseq500      | 151                | 246,945,900      | 37,288,830,900        | 244,698,580                          |
| 3Kbp                | Mate-pair           | 3Kbp               | Nextseq500      | 76                 | 284,204,762      | 21,599,561,912        | 195,095,164                          |
| 6Kbp                | Mate-pair           | 6Kbp               | Nextseq500      | 76                 | 246,238,370      | 18,714,116,120        | 152,496,372                          |
| 9Kbp                | Mate-pair           | 9Kbp               | Nextseq500      | 76                 | 239,919,538      | 18,233,884,888        | 148,612,724                          |
| <b>Total</b>        |                     |                    |                 |                    | 1,310,484,838    | 140,106,010,288       | 1,031,973,202                        |

1 Table 2. Summary statistics of generated Illumina synthetic long read (Moleculo) library.  
2

|    | 500-1499bp | >= 1500bp |
|----|------------|-----------|
| 3  |            |           |
| 4  |            |           |
| 5  |            |           |
| 6  |            |           |
| 7  |            |           |
| 8  |            |           |
| 9  |            |           |
| 10 |            |           |
| 11 |            |           |
| 12 |            |           |
| 13 |            |           |
| 14 |            |           |
| 15 |            |           |
| 16 |            |           |
| 17 |            |           |
| 18 |            |           |
| 19 |            |           |
| 20 |            |           |
| 21 |            |           |
| 22 |            |           |
| 23 |            |           |
| 24 |            |           |
| 25 |            |           |
| 26 |            |           |
| 27 |            |           |
| 28 |            |           |
| 29 |            |           |
| 30 |            |           |
| 31 |            |           |
| 32 |            |           |
| 33 |            |           |
| 34 |            |           |
| 35 |            |           |
| 36 |            |           |
| 37 |            |           |
| 38 |            |           |
| 39 |            |           |
| 40 |            |           |
| 41 |            |           |
| 42 |            |           |
| 43 |            |           |
| 44 |            |           |
| 45 |            |           |
| 46 |            |           |
| 47 |            |           |
| 48 |            |           |
| 49 |            |           |
| 50 |            |           |
| 51 |            |           |
| 52 |            |           |
| 53 |            |           |
| 54 |            |           |
| 55 |            |           |
| 56 |            |           |
| 57 |            |           |
| 58 |            |           |
| 59 |            |           |
| 60 |            |           |
| 61 |            |           |
| 62 |            |           |
| 63 |            |           |
| 64 |            |           |
| 65 |            |           |

1 Table 3. Summary statistics of generated long reads data using Pacbio RS II system.  
2

---

|    |                                   |               |
|----|-----------------------------------|---------------|
| 3  |                                   |               |
| 4  | Number of Reads                   | 1,005,571     |
| 5  |                                   |               |
| 6  |                                   |               |
| 7  |                                   |               |
| 8  | Total Bases                       | 5,836,969,225 |
| 9  |                                   |               |
| 10 |                                   |               |
| 11 |                                   |               |
| 12 | Length of longest (shortest) read | 50,132(50)    |
| 13 |                                   |               |
| 14 |                                   |               |
| 15 | Average read length               | 5,804.63      |
| 16 |                                   |               |
| 17 |                                   |               |

---

18  
19  
20  
21  
22  
23  
24  
25  
26  
27  
28  
29  
30  
31  
32  
33  
34  
35  
36  
37  
38  
39  
40  
41  
42  
43  
44  
45  
46  
47  
48  
49  
50  
51  
52  
53  
54  
55  
56  
57  
58  
59  
60  
61  
62  
63  
64  
65

Table 4. Summary statistics of generated transcriptome data obtained from six organ tissues using Illumina platform.

| Tissue                     | Sample Name     | Read Length | Read Count | Total Base (bp) |
|----------------------------|-----------------|-------------|------------|-----------------|
| Hemocyte                   | Hemocyte_1      | 76          | 20,815,674 | 1,581,991,224   |
|                            | Hemocyte_2      | 76          | 26,704,666 | 2,029,554,616   |
|                            | Hemocyte_2      | 76          | 53,068,562 | 4,033,210,712   |
| Malpighian Tube            | Malpighi_1      | 76          | 22,635,428 | 1,720,292,528   |
|                            | Malpighi_2      | 76          | 24,893,788 | 1,891,927,888   |
|                            | Malpighi_3      | 76          | 45,213,164 | 3,436,200,464   |
| Midgut                     | Midgut_1        | 76          | 23,350,138 | 1,774,610,488   |
|                            | Midgut_2        | 76          | 24,597,972 | 1,869,445,872   |
|                            | Midgut_3        | 76          | 50,949,986 | 3,872,198,936   |
| Head                       | Head_1          | 76          | 26,526,276 | 2,015,996,976   |
|                            | Head_2          | 76          | 26,581,124 | 2,020,165,424   |
|                            | Head_3          | 76          | 40,900,456 | 3,108,434,656   |
| Integument                 | Skin_1          | 76          | 24,592,846 | 1,869,056,296   |
|                            | Skin_2          | 76          | 42,775,430 | 3,250,932,680   |
|                            | Skin_3          | 76          | 35,043,570 | 2,663,311,320   |
| Fat Body                   | Fat Body_1      | 76          | 24,637,810 | 1,872,473,560   |
|                            | Fat Body_2      | 76          | 24,037,494 | 1,826,849,544   |
|                            | Fat Body_3      | 76          | 40,817,582 | 3,102,136,232   |
| Anterior-Middle/Silk Gland | AM/Silk Gland_1 | 76          | 21,399,638 | 1,626,372,488   |
|                            | AM/Silk Gland_2 | 76          | 24,292,386 | 1,846,221,336   |
|                            | AM/Silk Gland_3 | 76          | 37,331,530 | 2,837,196,280   |
| Posterior/Silk Gland       | P/Silk Gland_1  | 76          | 27,359,580 | 2,079,328,080   |
|                            | P/Silk Gland_2  | 76          | 23,300,962 | 1,770,873,112   |
|                            | P/Silk Gland_3  | 76          | 39,421,430 | 2,996,028,680   |
| Testis                     | Testis_1        | 76          | 40,890,404 | 3,107,670,704   |
|                            | Testis_2        | 76          | 45,733,846 | 3,475,772,296   |
|                            | Testis_3        | 76          | 44,985,224 | 3,418,877,024   |
| Ovary                      | Ovary_1         | 76          | 40,797,628 | 3,100,619,728   |
|                            | Ovary_2         | 76          | 40,409,752 | 3,071,141,152   |
|                            | Ovary_3         | 76          | 42,417,892 | 3,223,759,792   |

1 Table 5. Summary statistics of the *A. yamamai* genome (>2kb).  
2  
3

4 **Assembled Genome**  
5

---

|    |                                  |                   |
|----|----------------------------------|-------------------|
| 6  | Size(1n)                         | 656 Mb            |
| 7  |                                  |                   |
| 8  | GC level                         | 34.07             |
| 9  |                                  |                   |
| 10 | No. scaffolds                    | 3,675             |
| 11 |                                  |                   |
| 12 | N50 of scaffolds (bp)            | 739,388           |
| 13 |                                  |                   |
| 14 | N bases in scaffolds (%)         | 19,257,439 (2.93) |
| 15 |                                  |                   |
| 16 | Longest(shortest) scaffolds (bp) | 3,156,949 (2,003) |
| 17 |                                  |                   |
| 18 | Average scaffold Length (bp)     | 178,657.53        |
| 19 |                                  |                   |

---

20  
21  
22  
23  
24  
25  
26  
27  
28  
29  
30  
31  
32  
33  
34  
35  
36  
37  
38  
39  
40  
41  
42  
43  
44  
45  
46  
47  
48  
49  
50  
51  
52  
53  
54  
55  
56  
57  
58  
59  
60  
61  
62  
63  
64  
65

1  
2  
3  
4  
5  
6  
7  
8  
9  
10  
11  
12  
13  
14  
15  
16  
17  
18  
19  
20  
21  
22  
23  
24  
25  
26  
27  
28  
29  
30  
31  
32  
33  
34  
35  
36  
37  
38  
39  
40  
41  
42  
43  
44  
45  
46  
47  
48  
49  
50  
51  
52  
53  
54  
55  
56  
57  
58  
59  
60  
61  
62  
63  
64  
65

| <b>Repeat Element</b> | <b>No. Element</b> | <b>Length (%)</b>  |
|-----------------------|--------------------|--------------------|
| SINE                  | 59,968             | 8,615,338(1.30)    |
| LINE                  | 426,522            | 101,251,176(15.31) |
| LTR element           | 53,977             | 4,552,386(0.69)    |
| DNA element           | 512,760            | 69,071,227(10.44)  |
| Small RNA             | 43,645             | 6,691,619(1.01)    |
| Simple repeat         | 135,989            | 6,256,839(0.95)    |
| Low complexity        | 19,937             | 932,829(0.14)      |
| Unclassified          | 294,190            | 54,552,009(8.25)   |

Table 6. Summary of identified repeat elements in the *A. yamamai* genome.

16  
17  
18  
19  
20  
21  
22  
23  
24  
25  
26  
27  
28  
29  
30  
31  
32  
33  
34  
35  
36  
37  
38  
39  
40  
41  
42  
43  
44  
45  
46  
47  
48  
49  
50  
51  
52  
53  
54  
55  
56  
57  
58  
59  
60  
61  
62  
63  
64  
65

Table 7. Summary statistics of ab initio, RNA-seq based and homology-based gene prediction results.

| Evidence Type                    | Programs       | Element                   | Total count | Exon/Gene | Total length(bp) | Mean length(bp) |           |
|----------------------------------|----------------|---------------------------|-------------|-----------|------------------|-----------------|-----------|
| <i>ab_initio</i>                 | Augustus       | Gene                      | 14,576      | 4.85      | 142,415,318      | 9,770.53        |           |
|                                  |                | Exon                      | 70,733      |           | 14,736,668       | 208.34          |           |
|                                  | Geneid         | Gene                      | 10,946      | 2.25      | 46,119,402       | 4,213.35        |           |
|                                  |                | Exon                      | 24,686      |           | 3,925,563        | 159.01          |           |
|                                  | GeneMarks-ET   | Gene                      | 27,754      | 5.50      | 273,745,951      | 9,863.29        |           |
|                                  |                | Exon                      | 152,660     |           | 30,847,503       | 202.06          |           |
|                                  | RNA-seq        | Cufflinks<br>Transdecoder | Gene        | 36,213    | 7.03             | 840,429,061     | 23,207.94 |
|                                  |                |                           | Exon        | 254,770   |                  | 201,721,675     | 791.77    |
| Known Gene<br>(NCBI lepidoptera) | PASA<br>(gmap) |                           | 44,561      |           | 22,484,151       | 504.57          |           |

15  
16  
17  
18  
19  
20  
21  
22  
23  
24  
25  
26  
27  
28  
29  
30  
31  
32  
33  
34  
35  
36  
37  
38  
39  
40  
41  
42  
43  
44  
45  
46  
47  
48  
49  
50  
51  
52  
53  
54  
55  
56  
57  
58  
59  
60  
61  
62  
63  
64  
65

Table 8. Summary statistics for the consensus gene set of the *A. yamamai* genome.

---

| Element | No. elements | Exon/Gene | Avg. length | Total length | Genome coverage(%) |
|---------|--------------|-----------|-------------|--------------|--------------------|
| Gene    | 15,481       |           | 11,016.34   | 170,543,958  | 25.78              |
|         |              | 5.64      |             |              |                    |
| Exon    | 87,346       |           | 1,346.23    | 20,840,925   | 3.31               |

---



16  
17  
18  
19  
20  
21  
22  
23  
24  
25  
26  
27  
28  
29  
30  
31  
32  
33  
34  
35  
36  
37  
38  
39  
40  
41  
42  
43  
44  
45  
46  
47  
48  
49  
50  
51  
52  
53  
54  
55  
56  
57  
58  
59  
60  
61  
62  
63  
64  
65

# Figures

Figure 1. Photograph of *Antheraea Yamamai*. From left- larva, cocoon and adult *A. yamamai*, respectively. Green color is one of the representative characteristics of tensan silk.

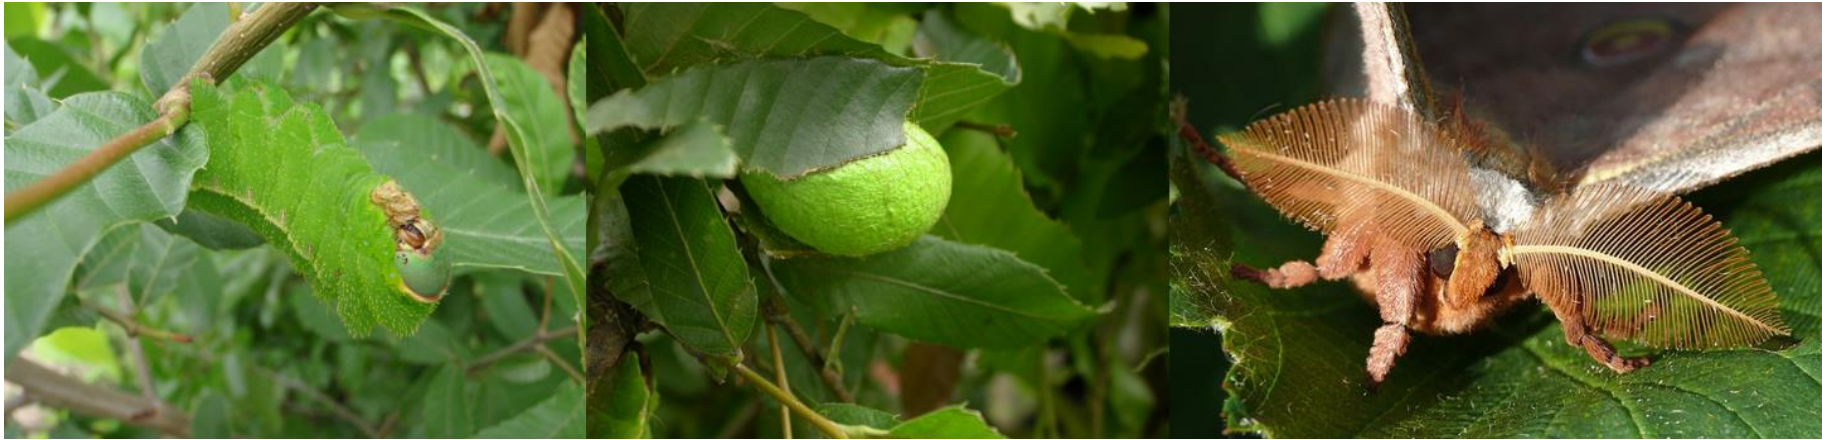

1 Figure 2. 19-mer distribution of *A. yamamai* genome using jellyfish with 350bp paired-end  
2  
3 whole genome sequencing data.  
4  
5  
6  
7

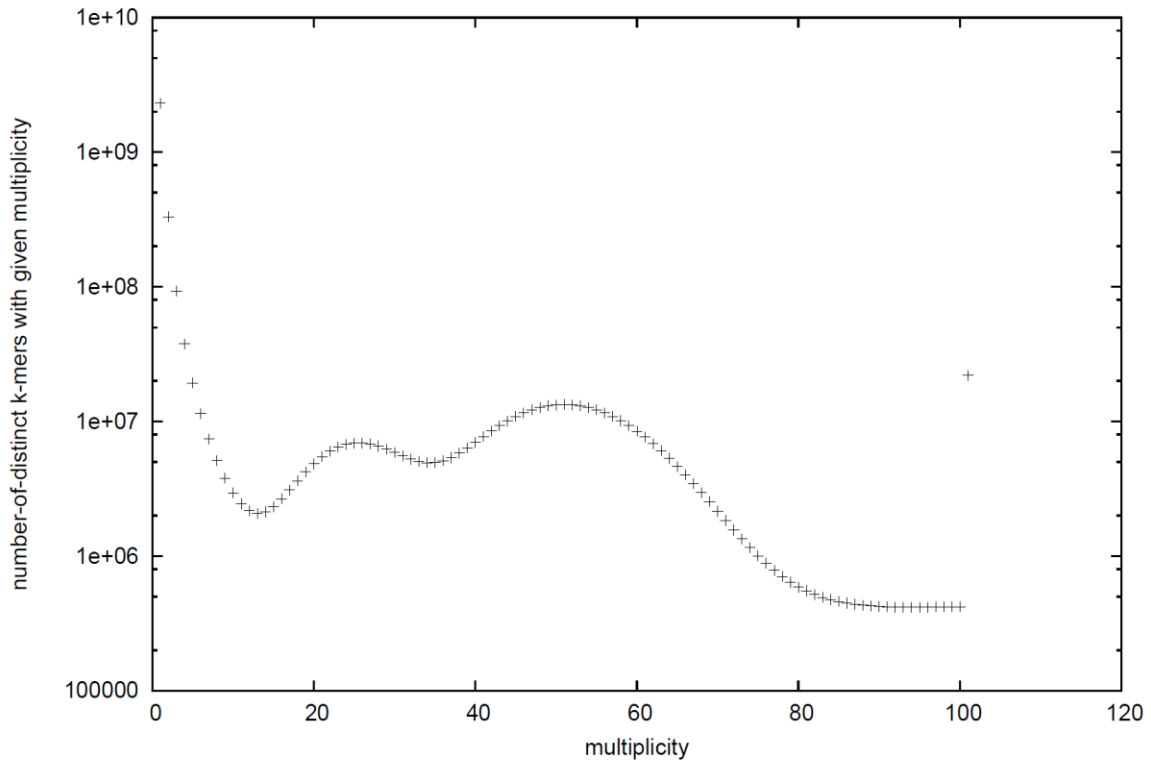

1 Figure 3. Amount and proportion of identified repeat element from 8 species including *A.*  
 2 *yamamai*. a. Absolute amount of repeat element classified into 8 different categories. b.  
 3  
 4 Proportion of each repeat element in identified total repeat element.  
 5  
 6  
 7  
 8  
 9

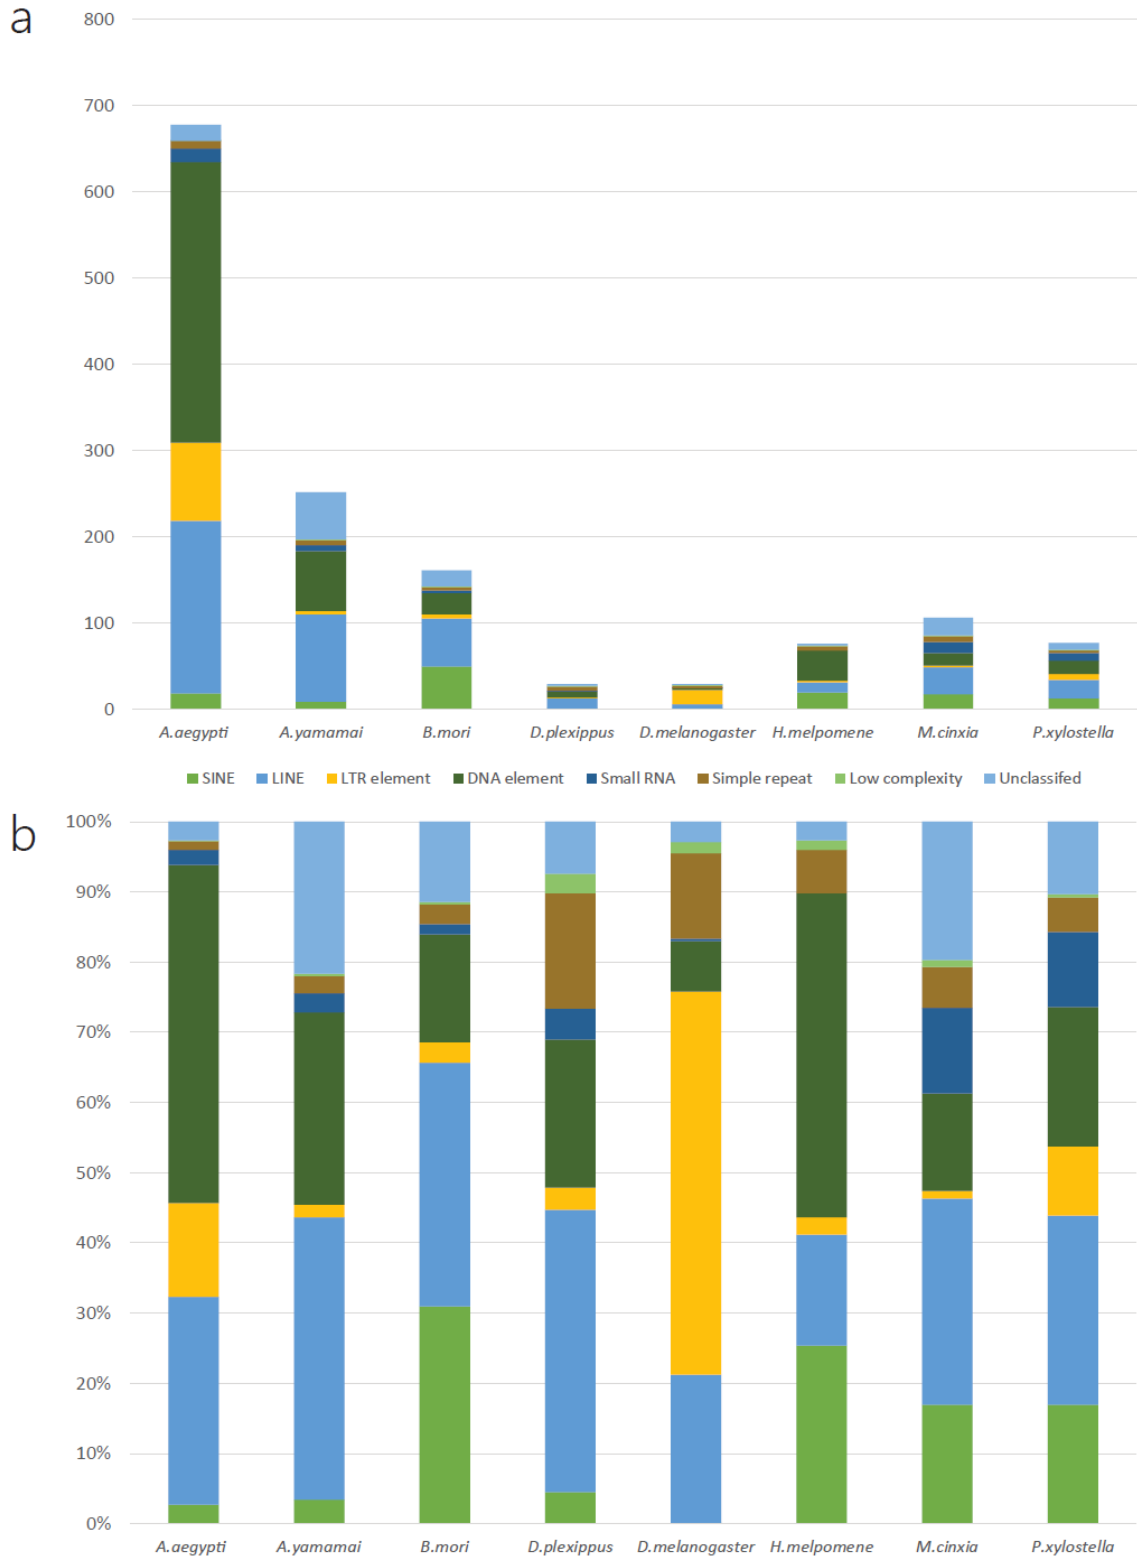

1 Figure 4. Constructed phylogenetic tree and comparative gene family analysis. Nodes value  
 2 indicate Bayesian posterior probability, bootstrap and gene expansion, contraction value.  
 3  
 4 Orange and blue color indicate expansion and contraction, respectively. Bar chart indicate the  
 5 number of genes cauterized into 4 groups (Specific, 1:Multi, Multi:Multi and 1:1) using  
 6  
 7  
 8  
 9  
 10  
 11  
 12  
 13  
 14  
 15  
 16  
 17  
 18  
 19  
 20  
 21  
 22  
 23  
 24  
 25  
 26  
 27  
 28  
 29  
 30  
 31  
 32  
 33  
 34  
 35  
 36  
 37  
 38  
 39  
 40  
 41  
 42  
 43  
 44  
 45  
 46  
 47  
 48  
 49  
 50  
 51  
 52  
 53  
 54  
 55  
 56  
 57  
 58  
 59  
 60  
 61  
 62  
 63  
 64  
 65

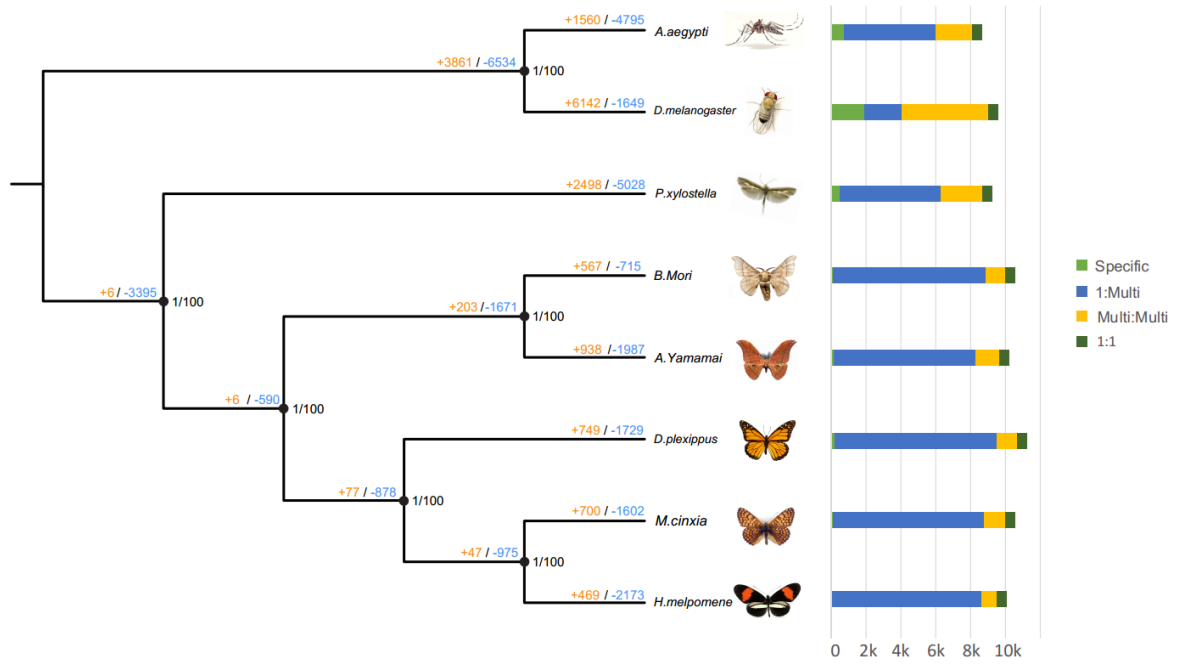

Figure 5. Expansion of chorion gene in *A.yamamai* genome. a and b shows the gene tree of chorion A and B in the rapid expanded gene family cluster, respectively. Color of terminal node indicates each taxon identified in the gene family cluster.

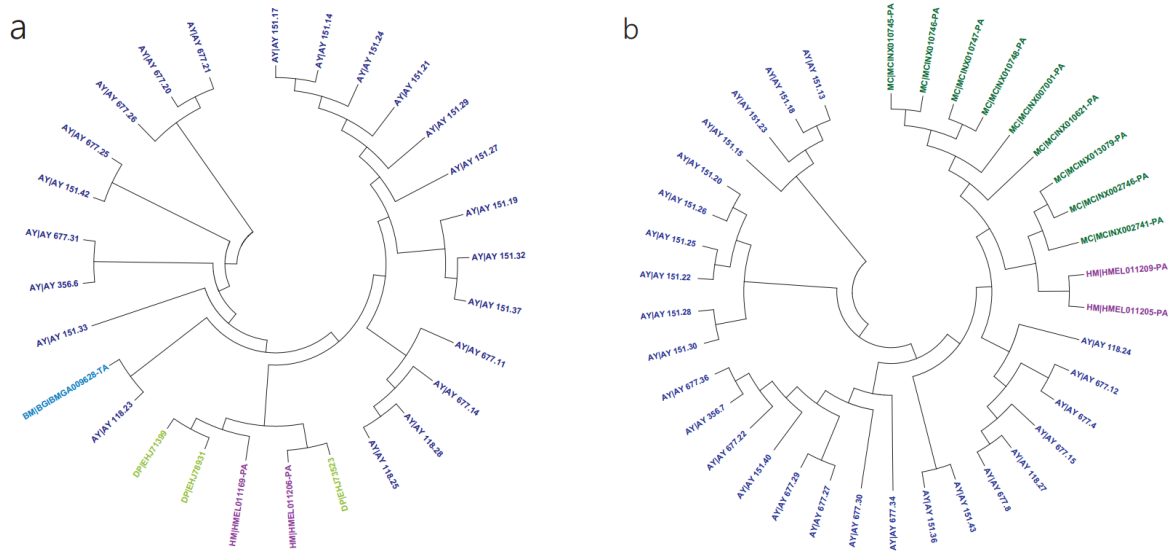

1  
2  
3  
4  
5  
6  
7  
8  
9  
10  
11  
12  
13  
14  
15  
16  
17  
18  
19  
20  
21  
22  
23  
24  
25  
26  
27  
28  
29  
30  
31  
32  
33  
34  
35  
36  
37  
38  
39  
40  
41  
42  
43  
44  
45  
46  
47  
48  
49  
50  
51  
52  
53  
54  
55  
56  
57  
58  
59  
60  
61  
62  
63  
64  
65

Figure 6. Karyotype of *A.yamamai* using a gamete of testis in metaphase.

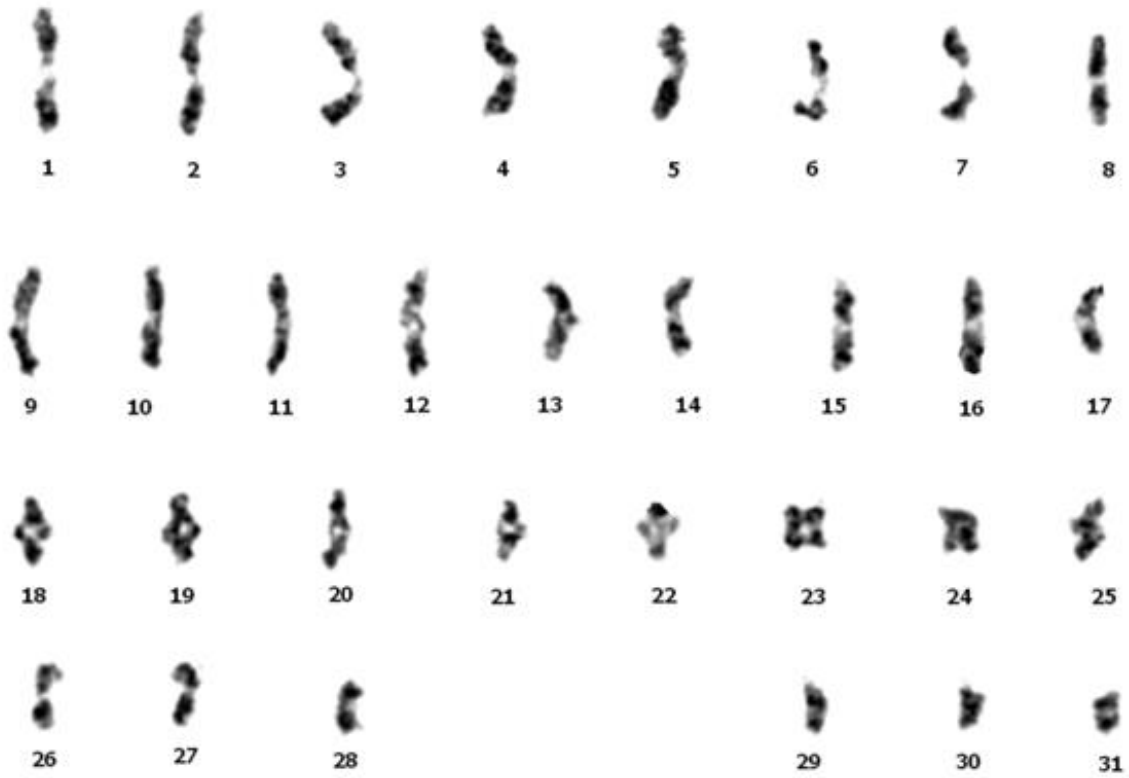

1  
2  
3  
4  
5  
6  
7  
8  
9  
10  
11  
12  
13  
14  
15  
16  
17  
18  
19  
20  
21  
22  
23  
24  
25  
26  
27  
28  
29  
30  
31  
32  
33  
34  
35  
36  
37  
38  
39  
40  
41  
42  
43  
44  
45  
46  
47  
48  
49  
50  
51  
52  
53  
54  
55  
56  
57  
58  
59  
60  
61  
62  
63  
64  
65

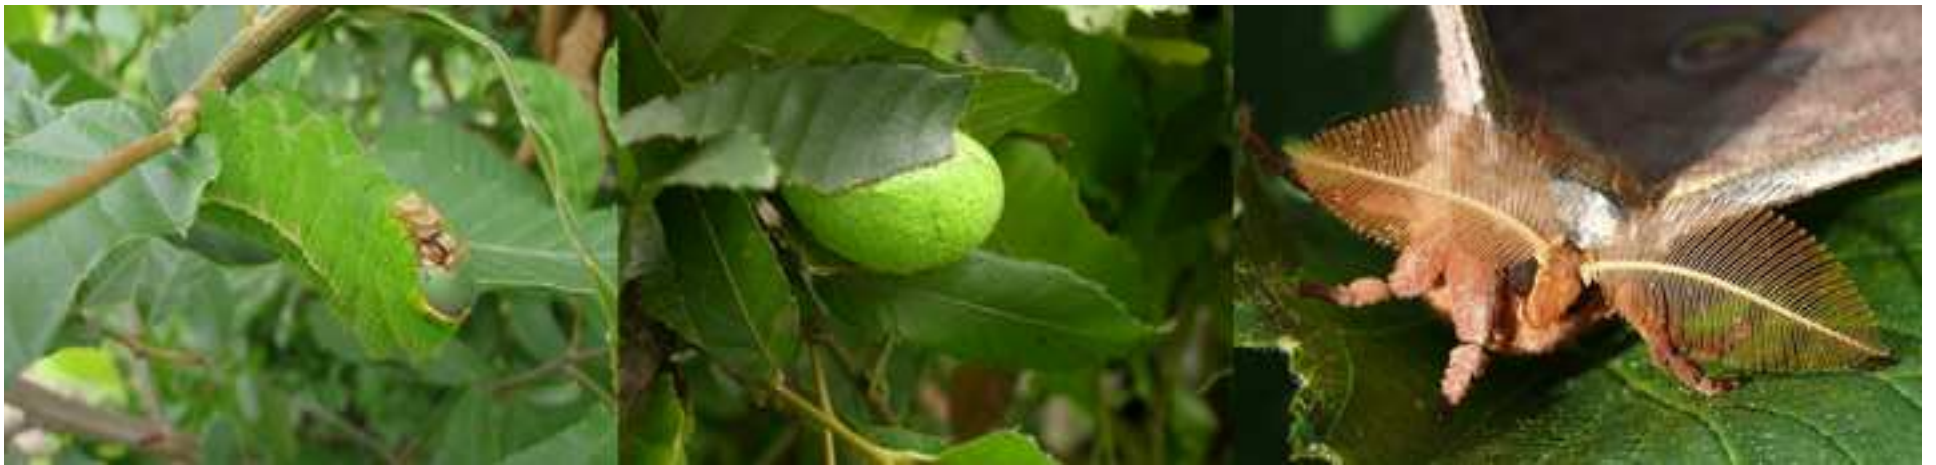

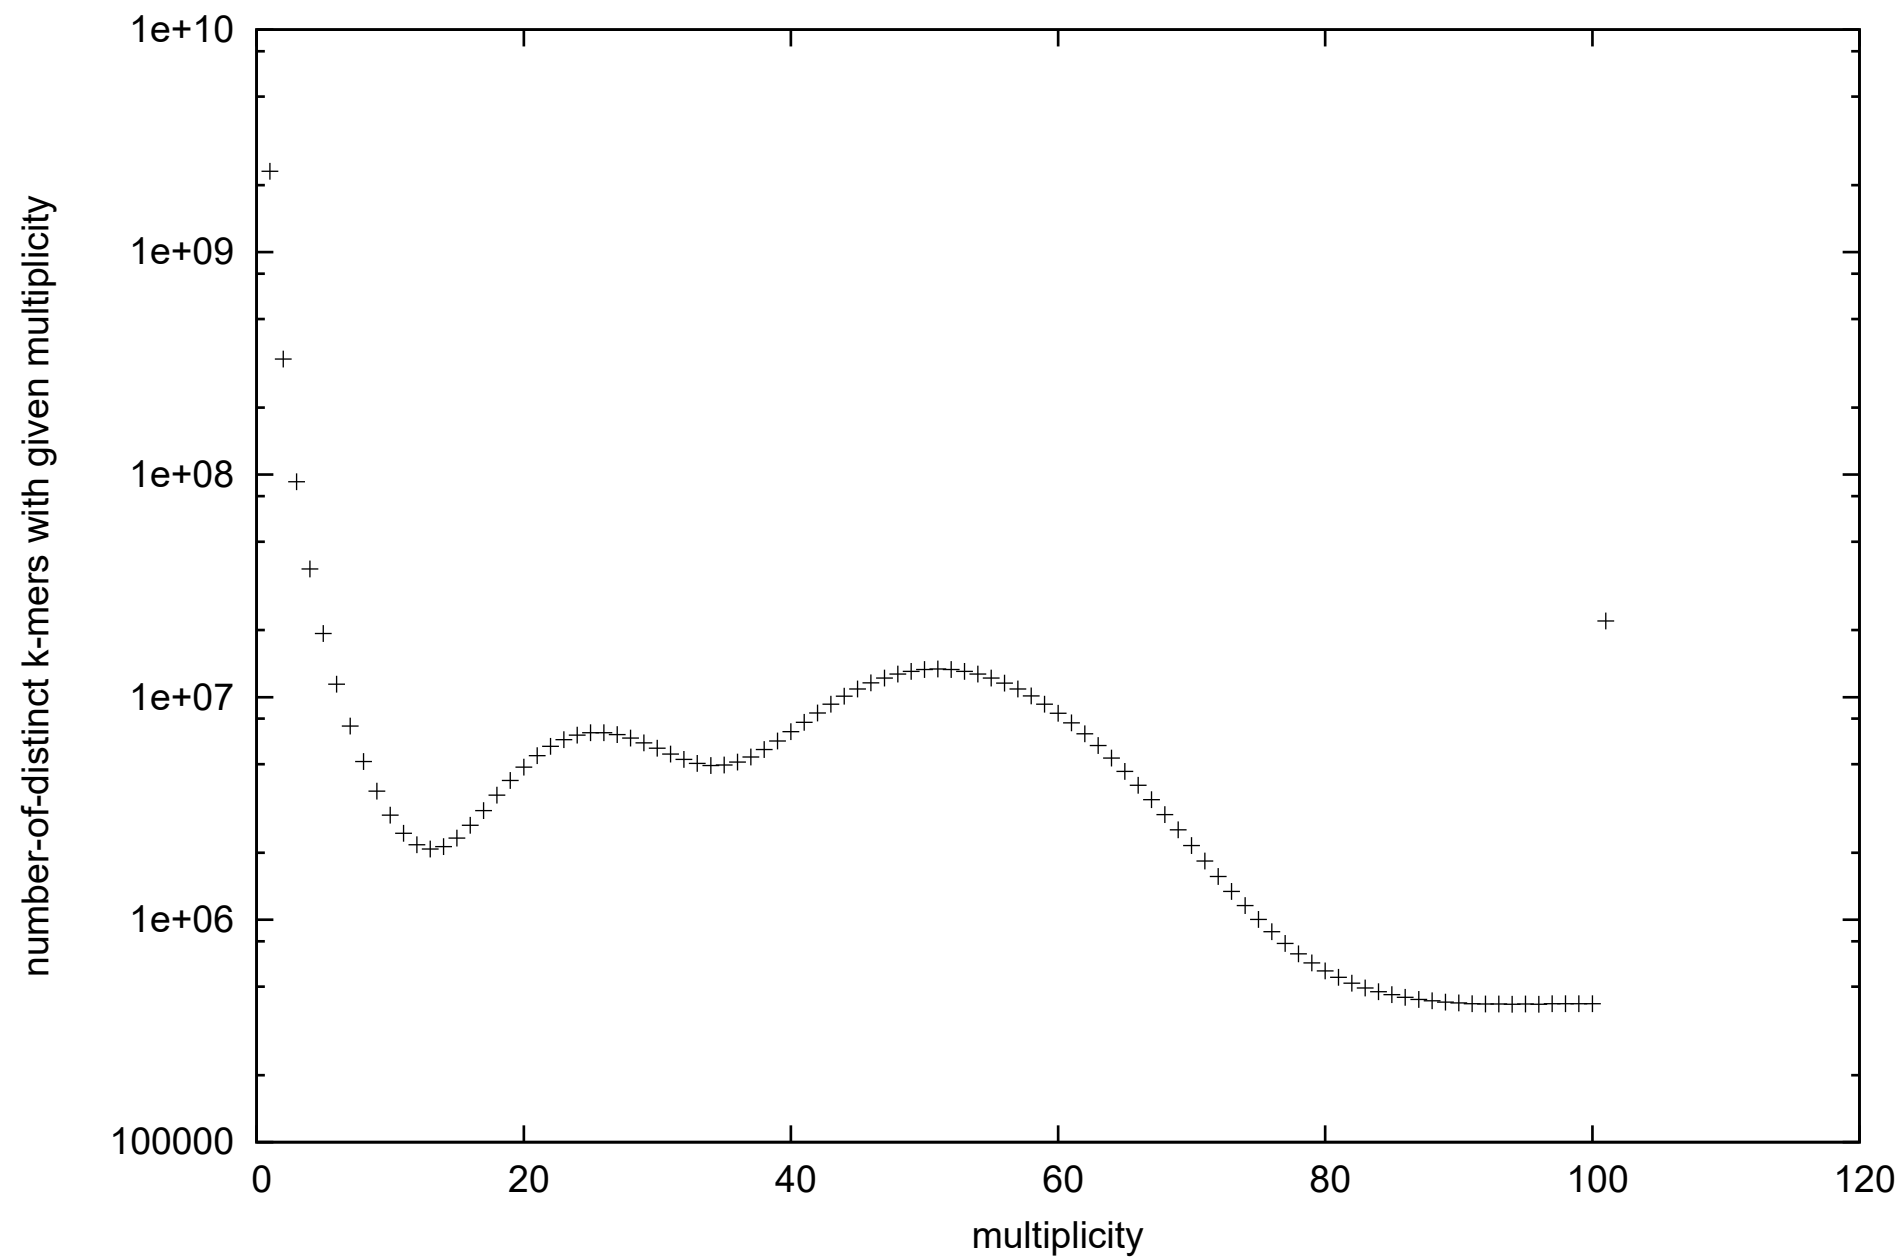



Figure 3  
a

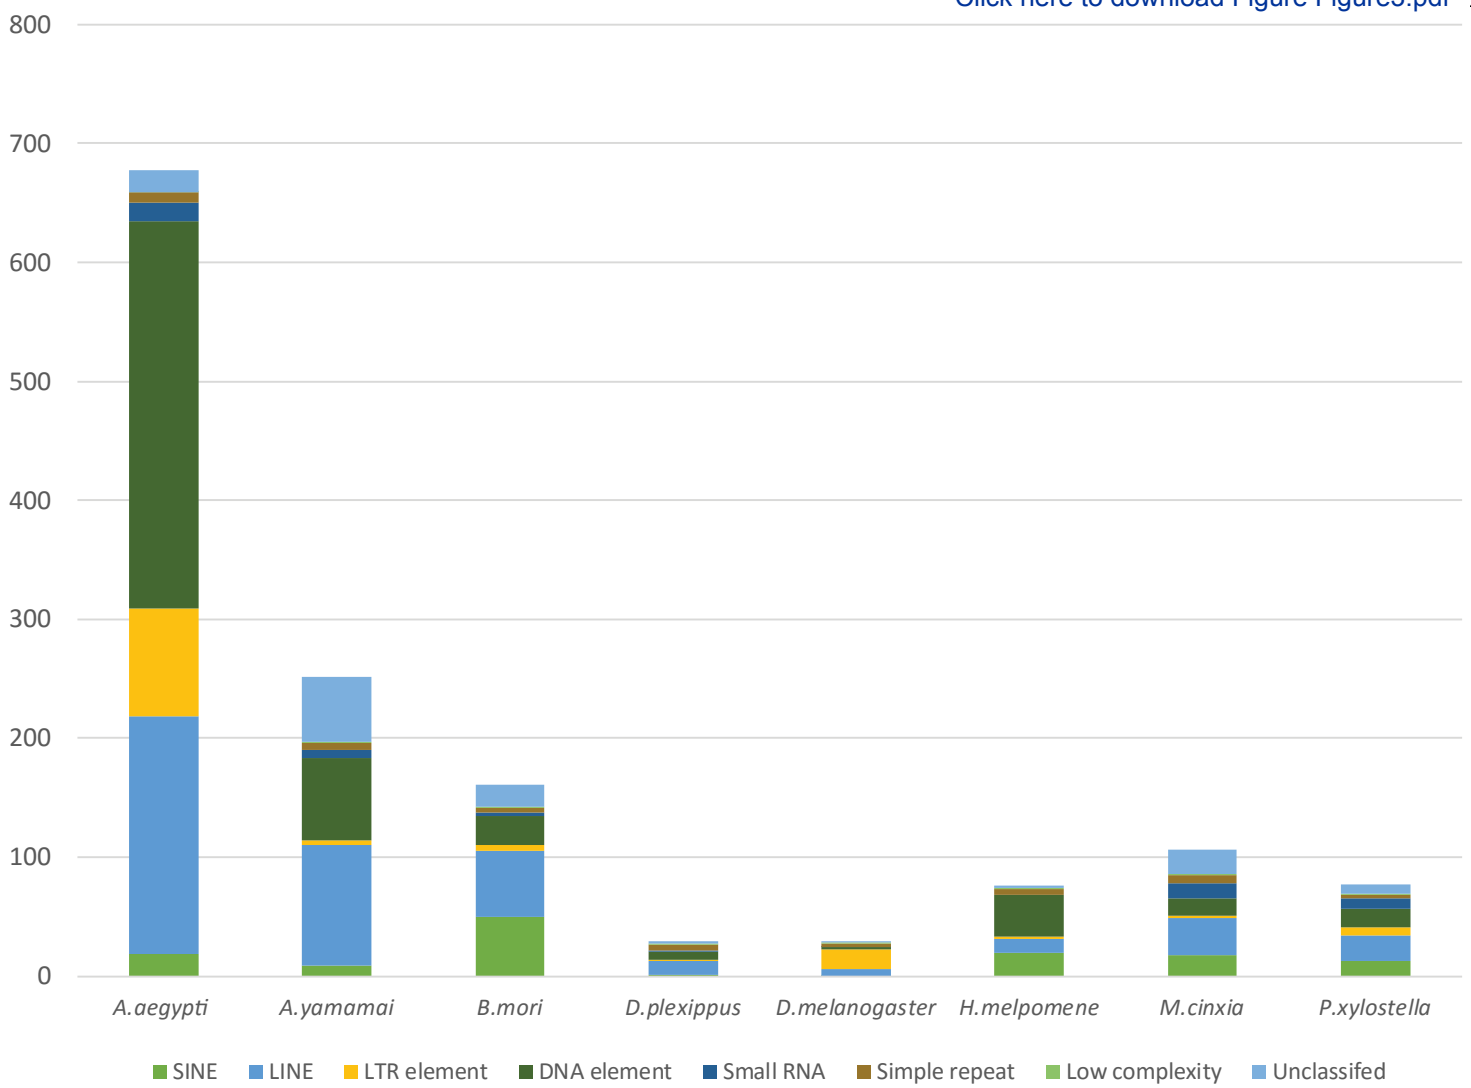

b

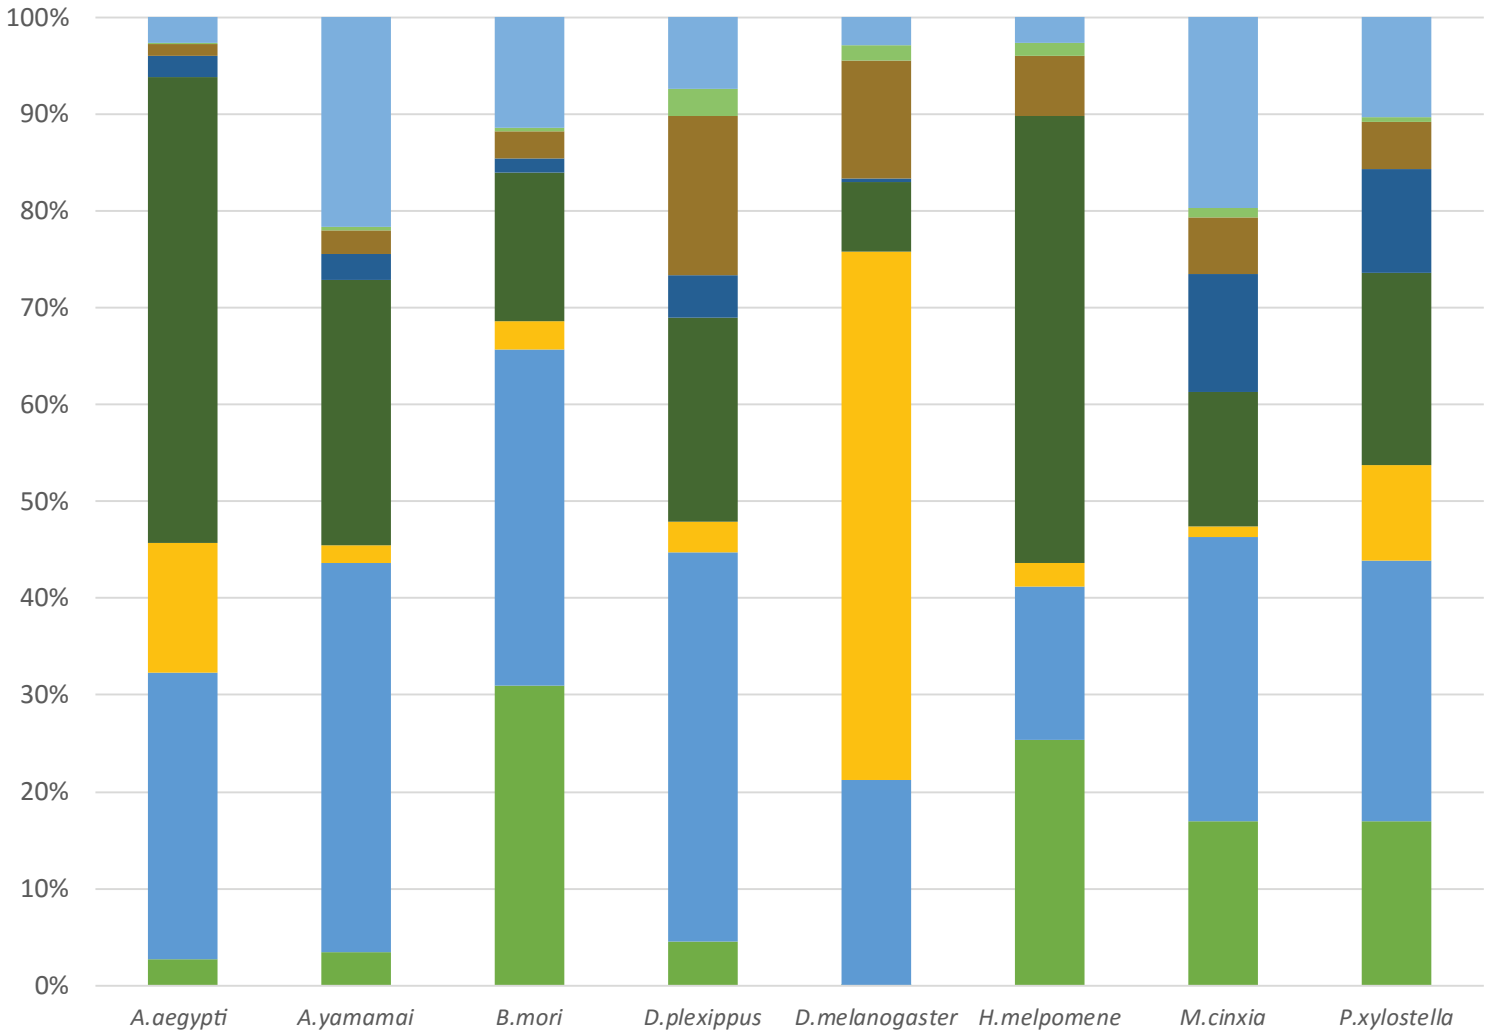

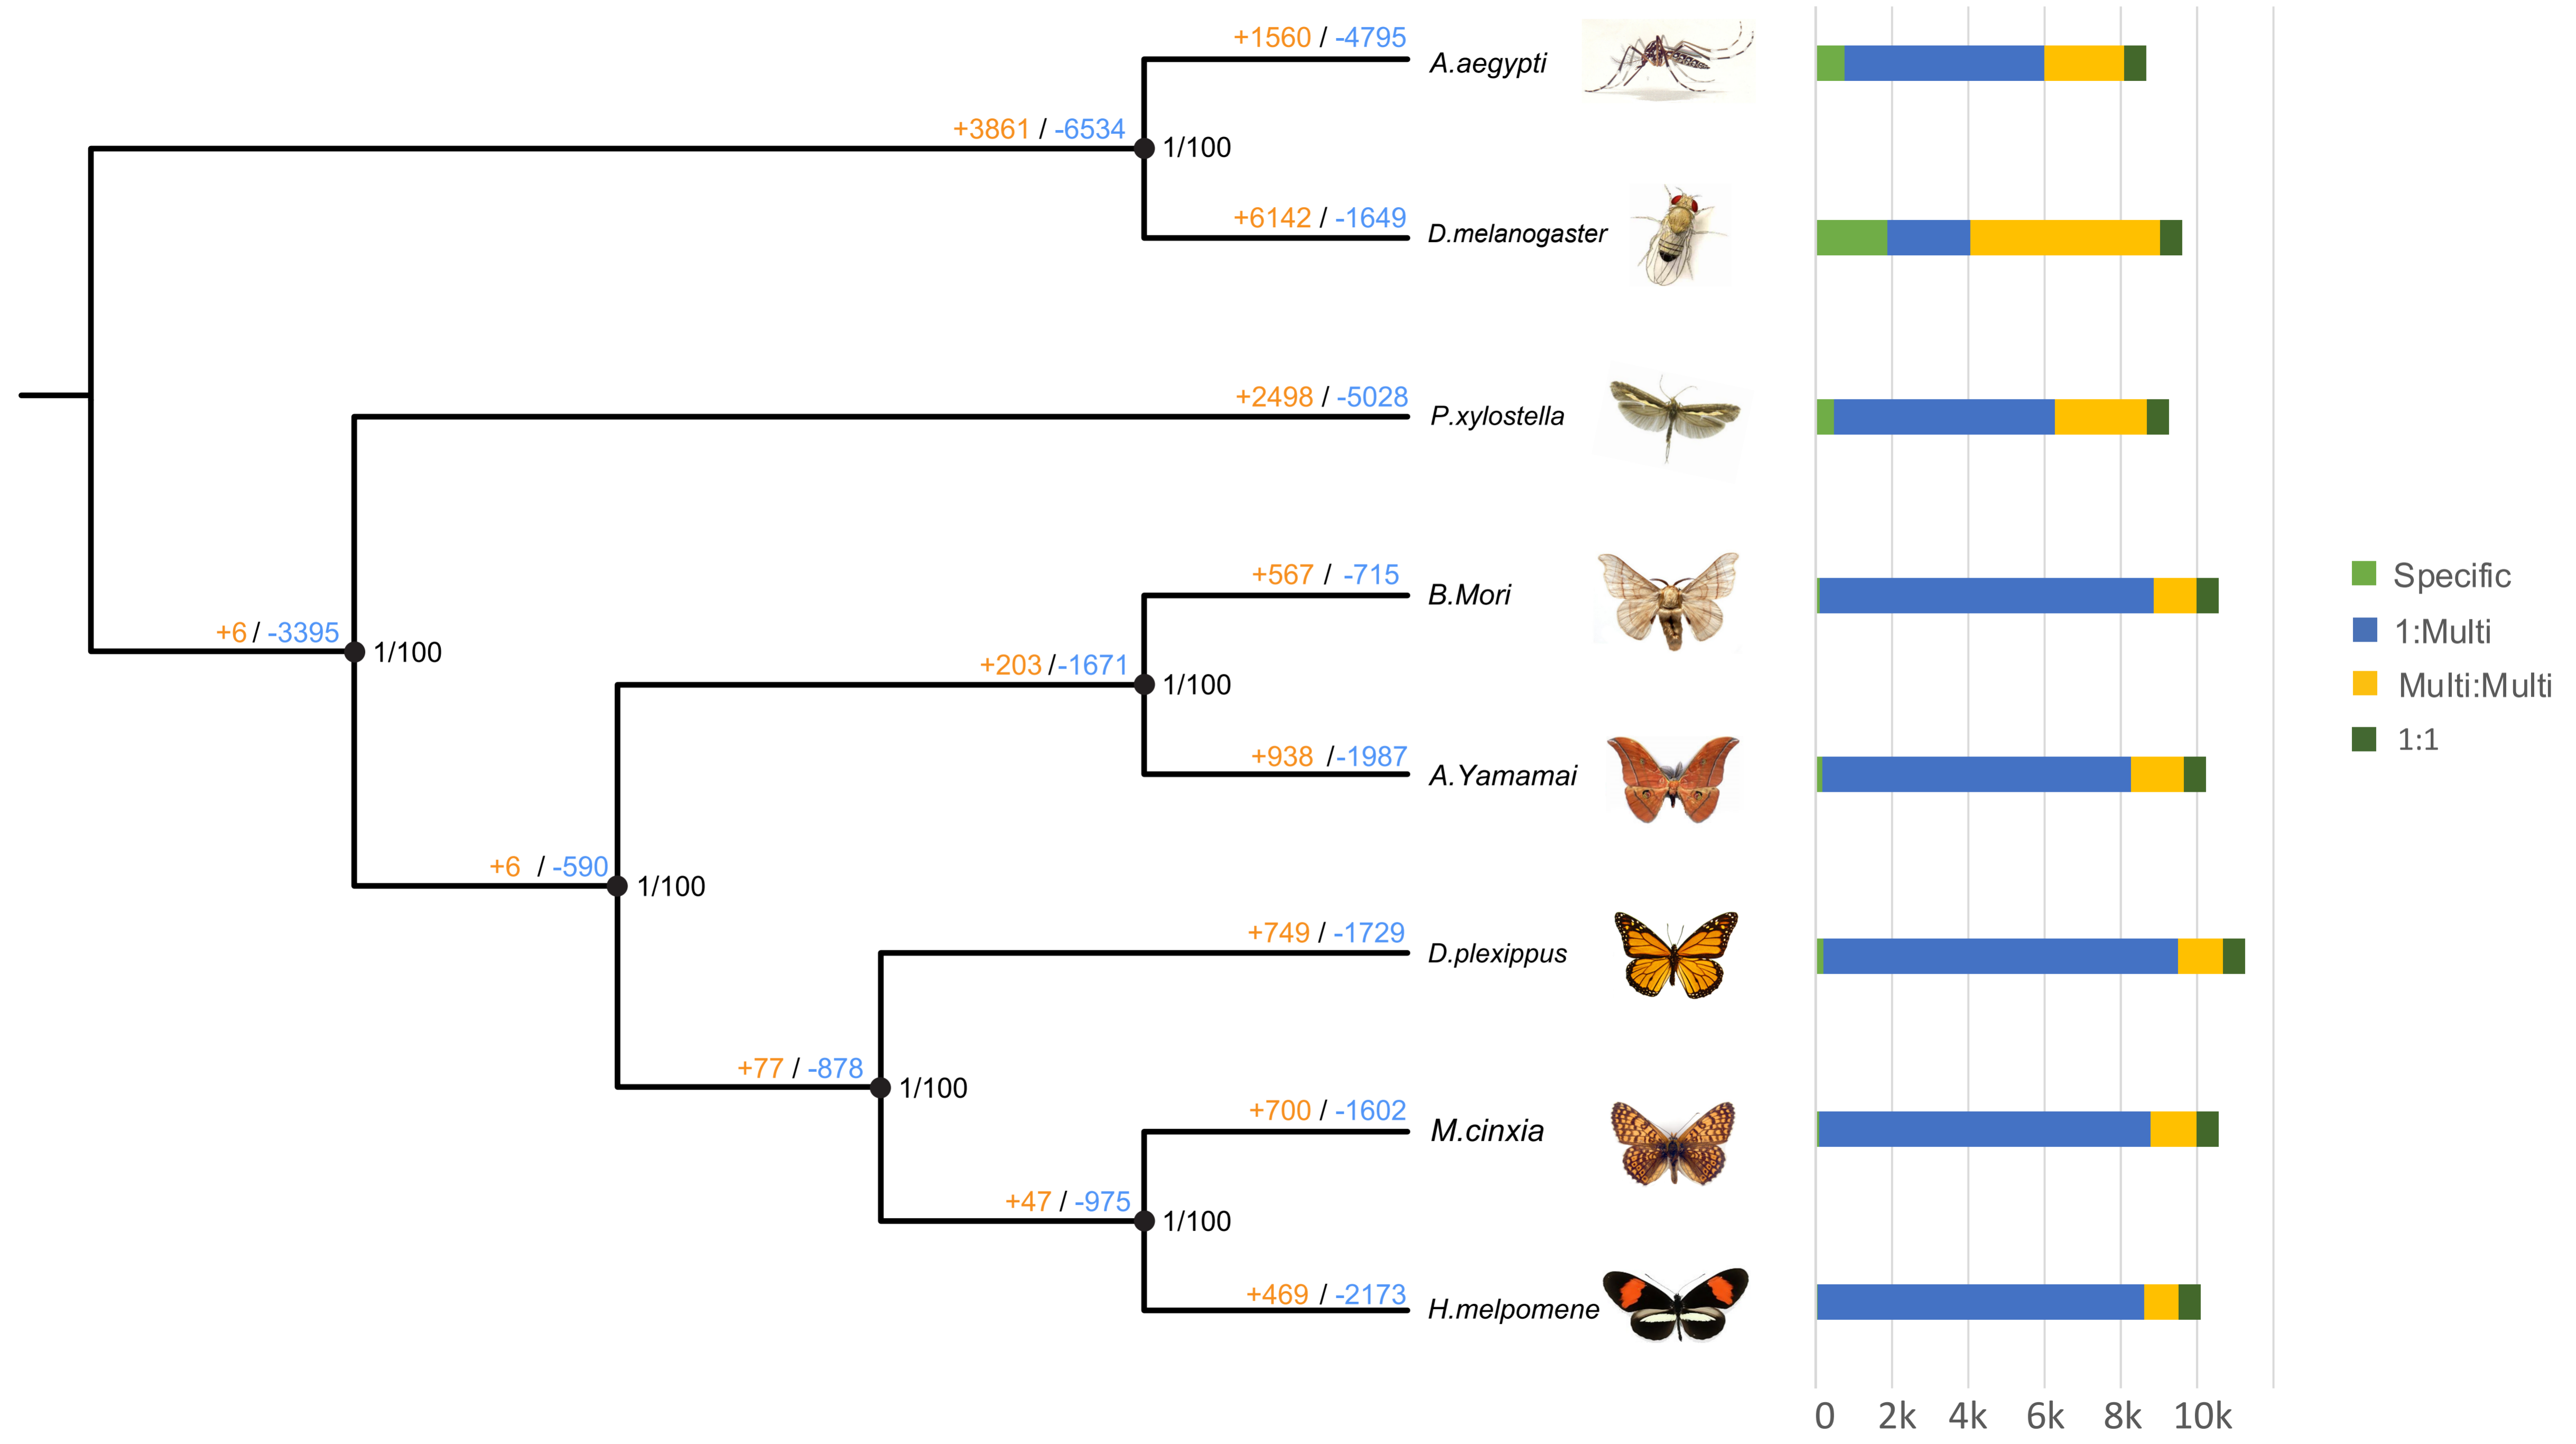

a

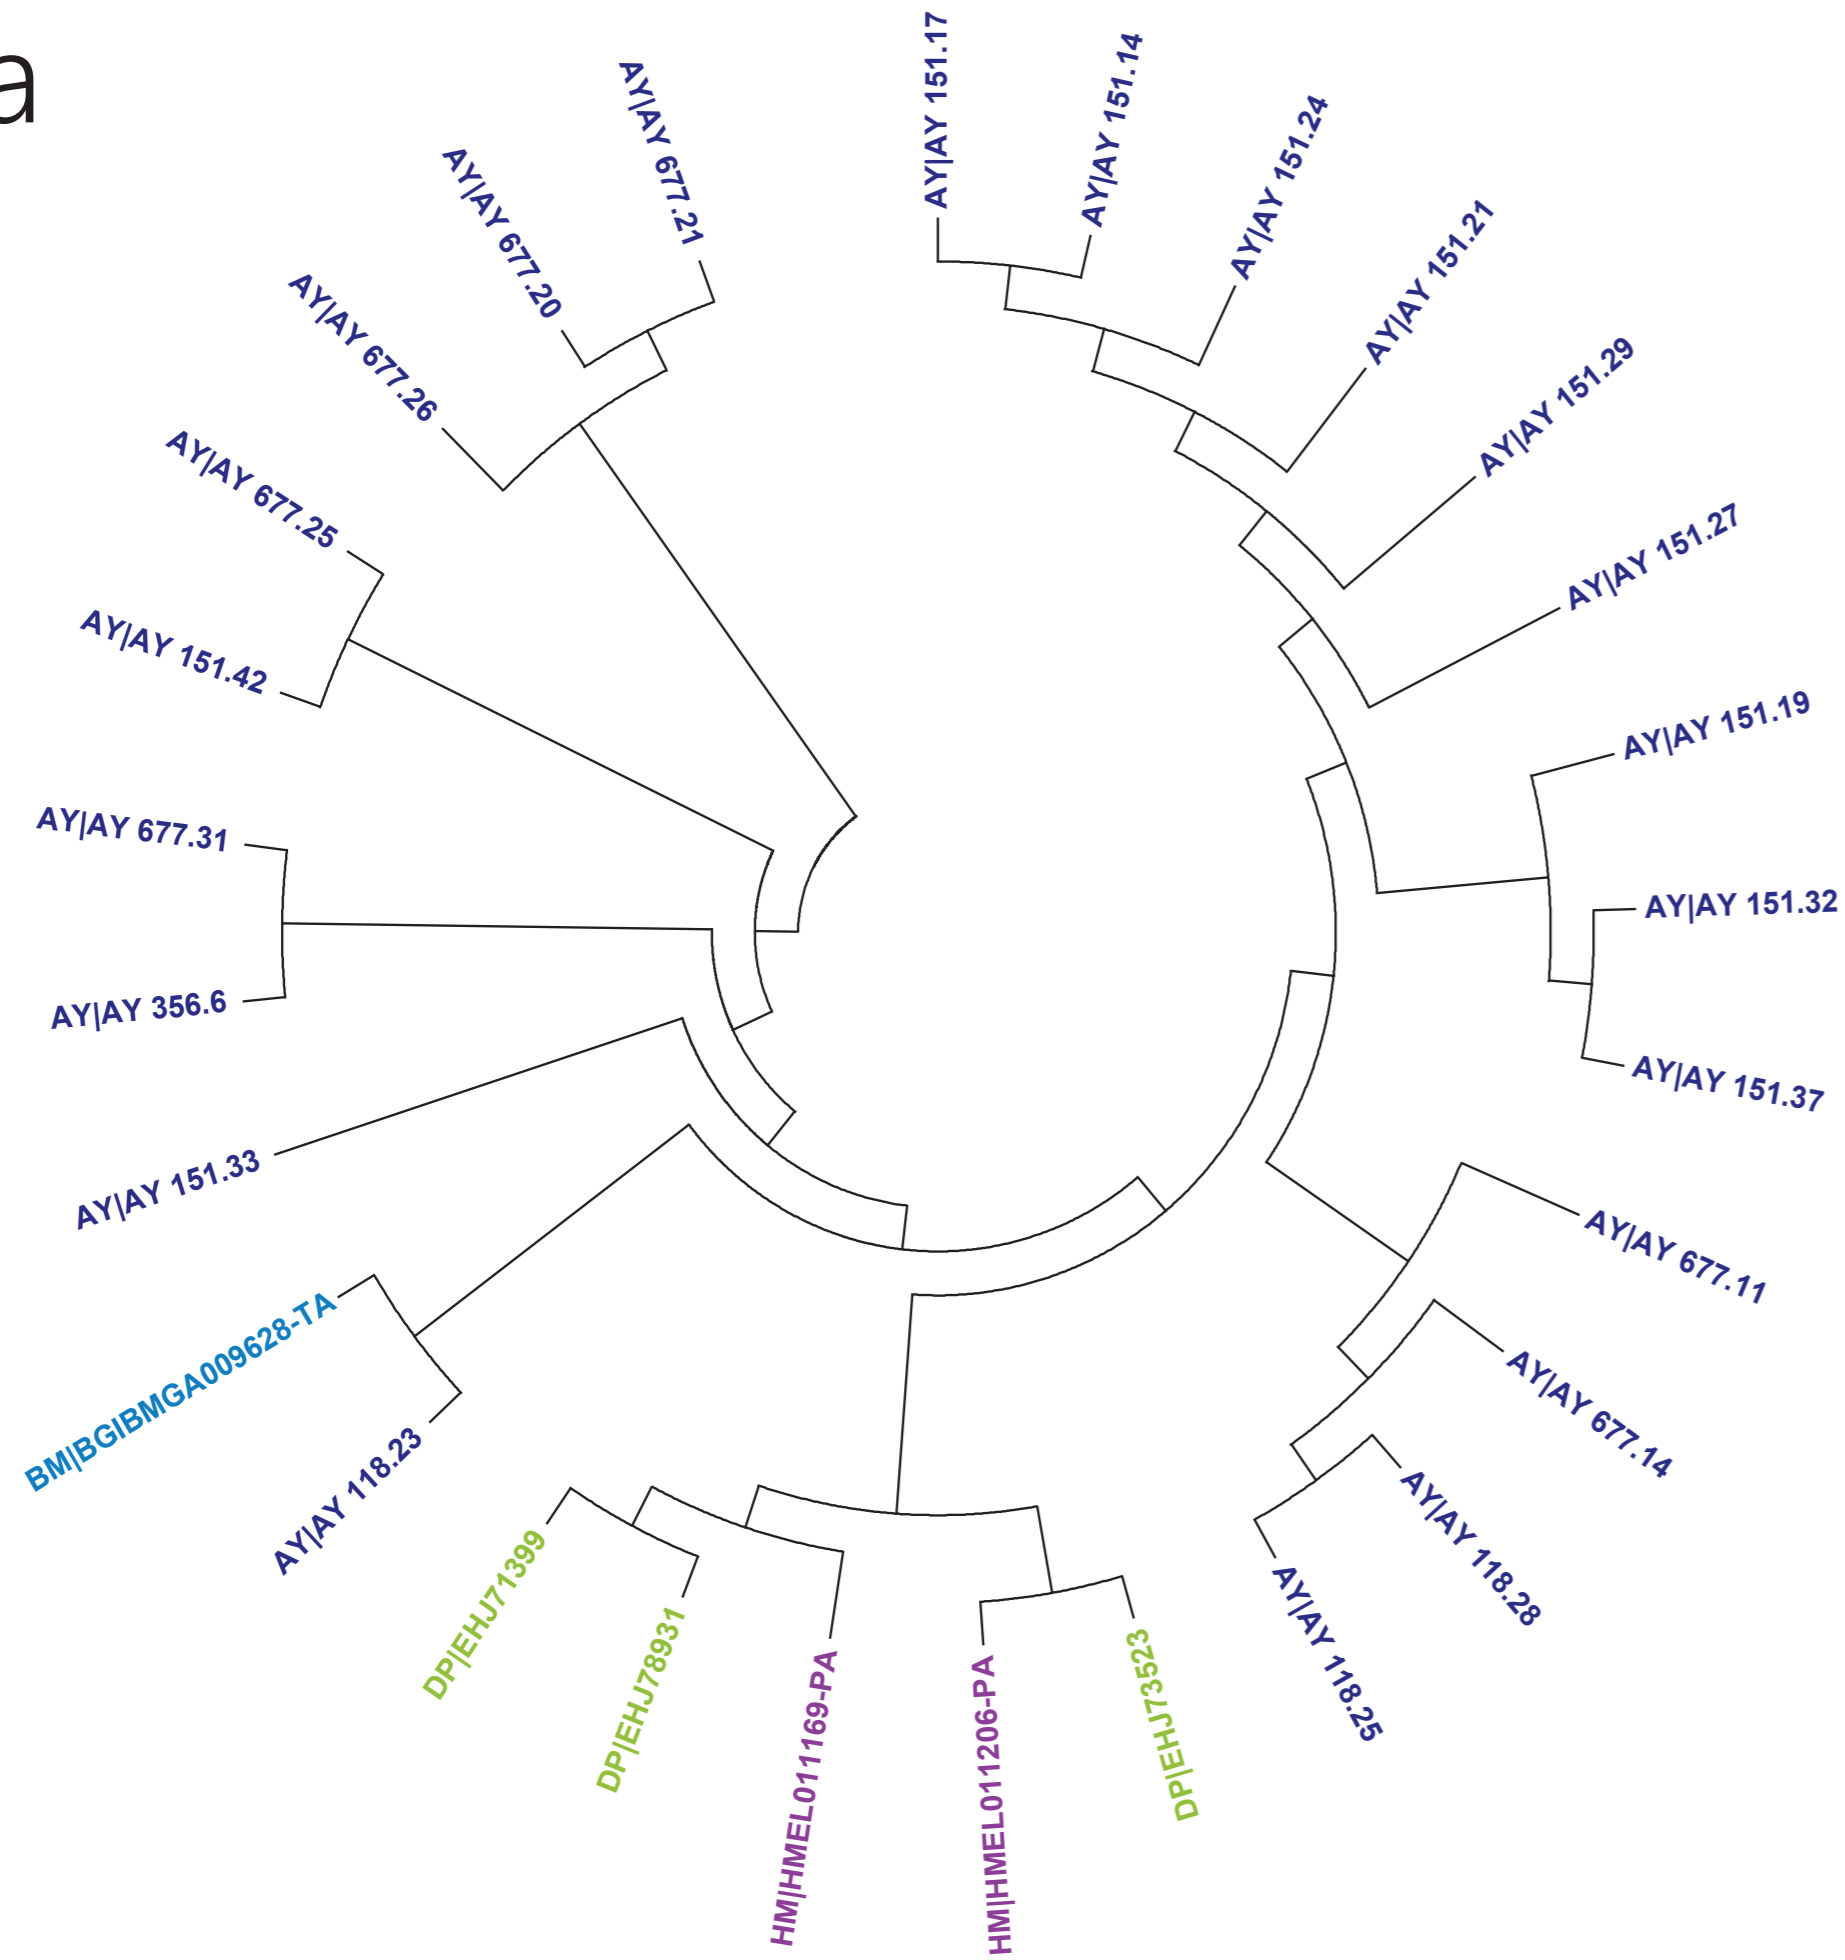

b

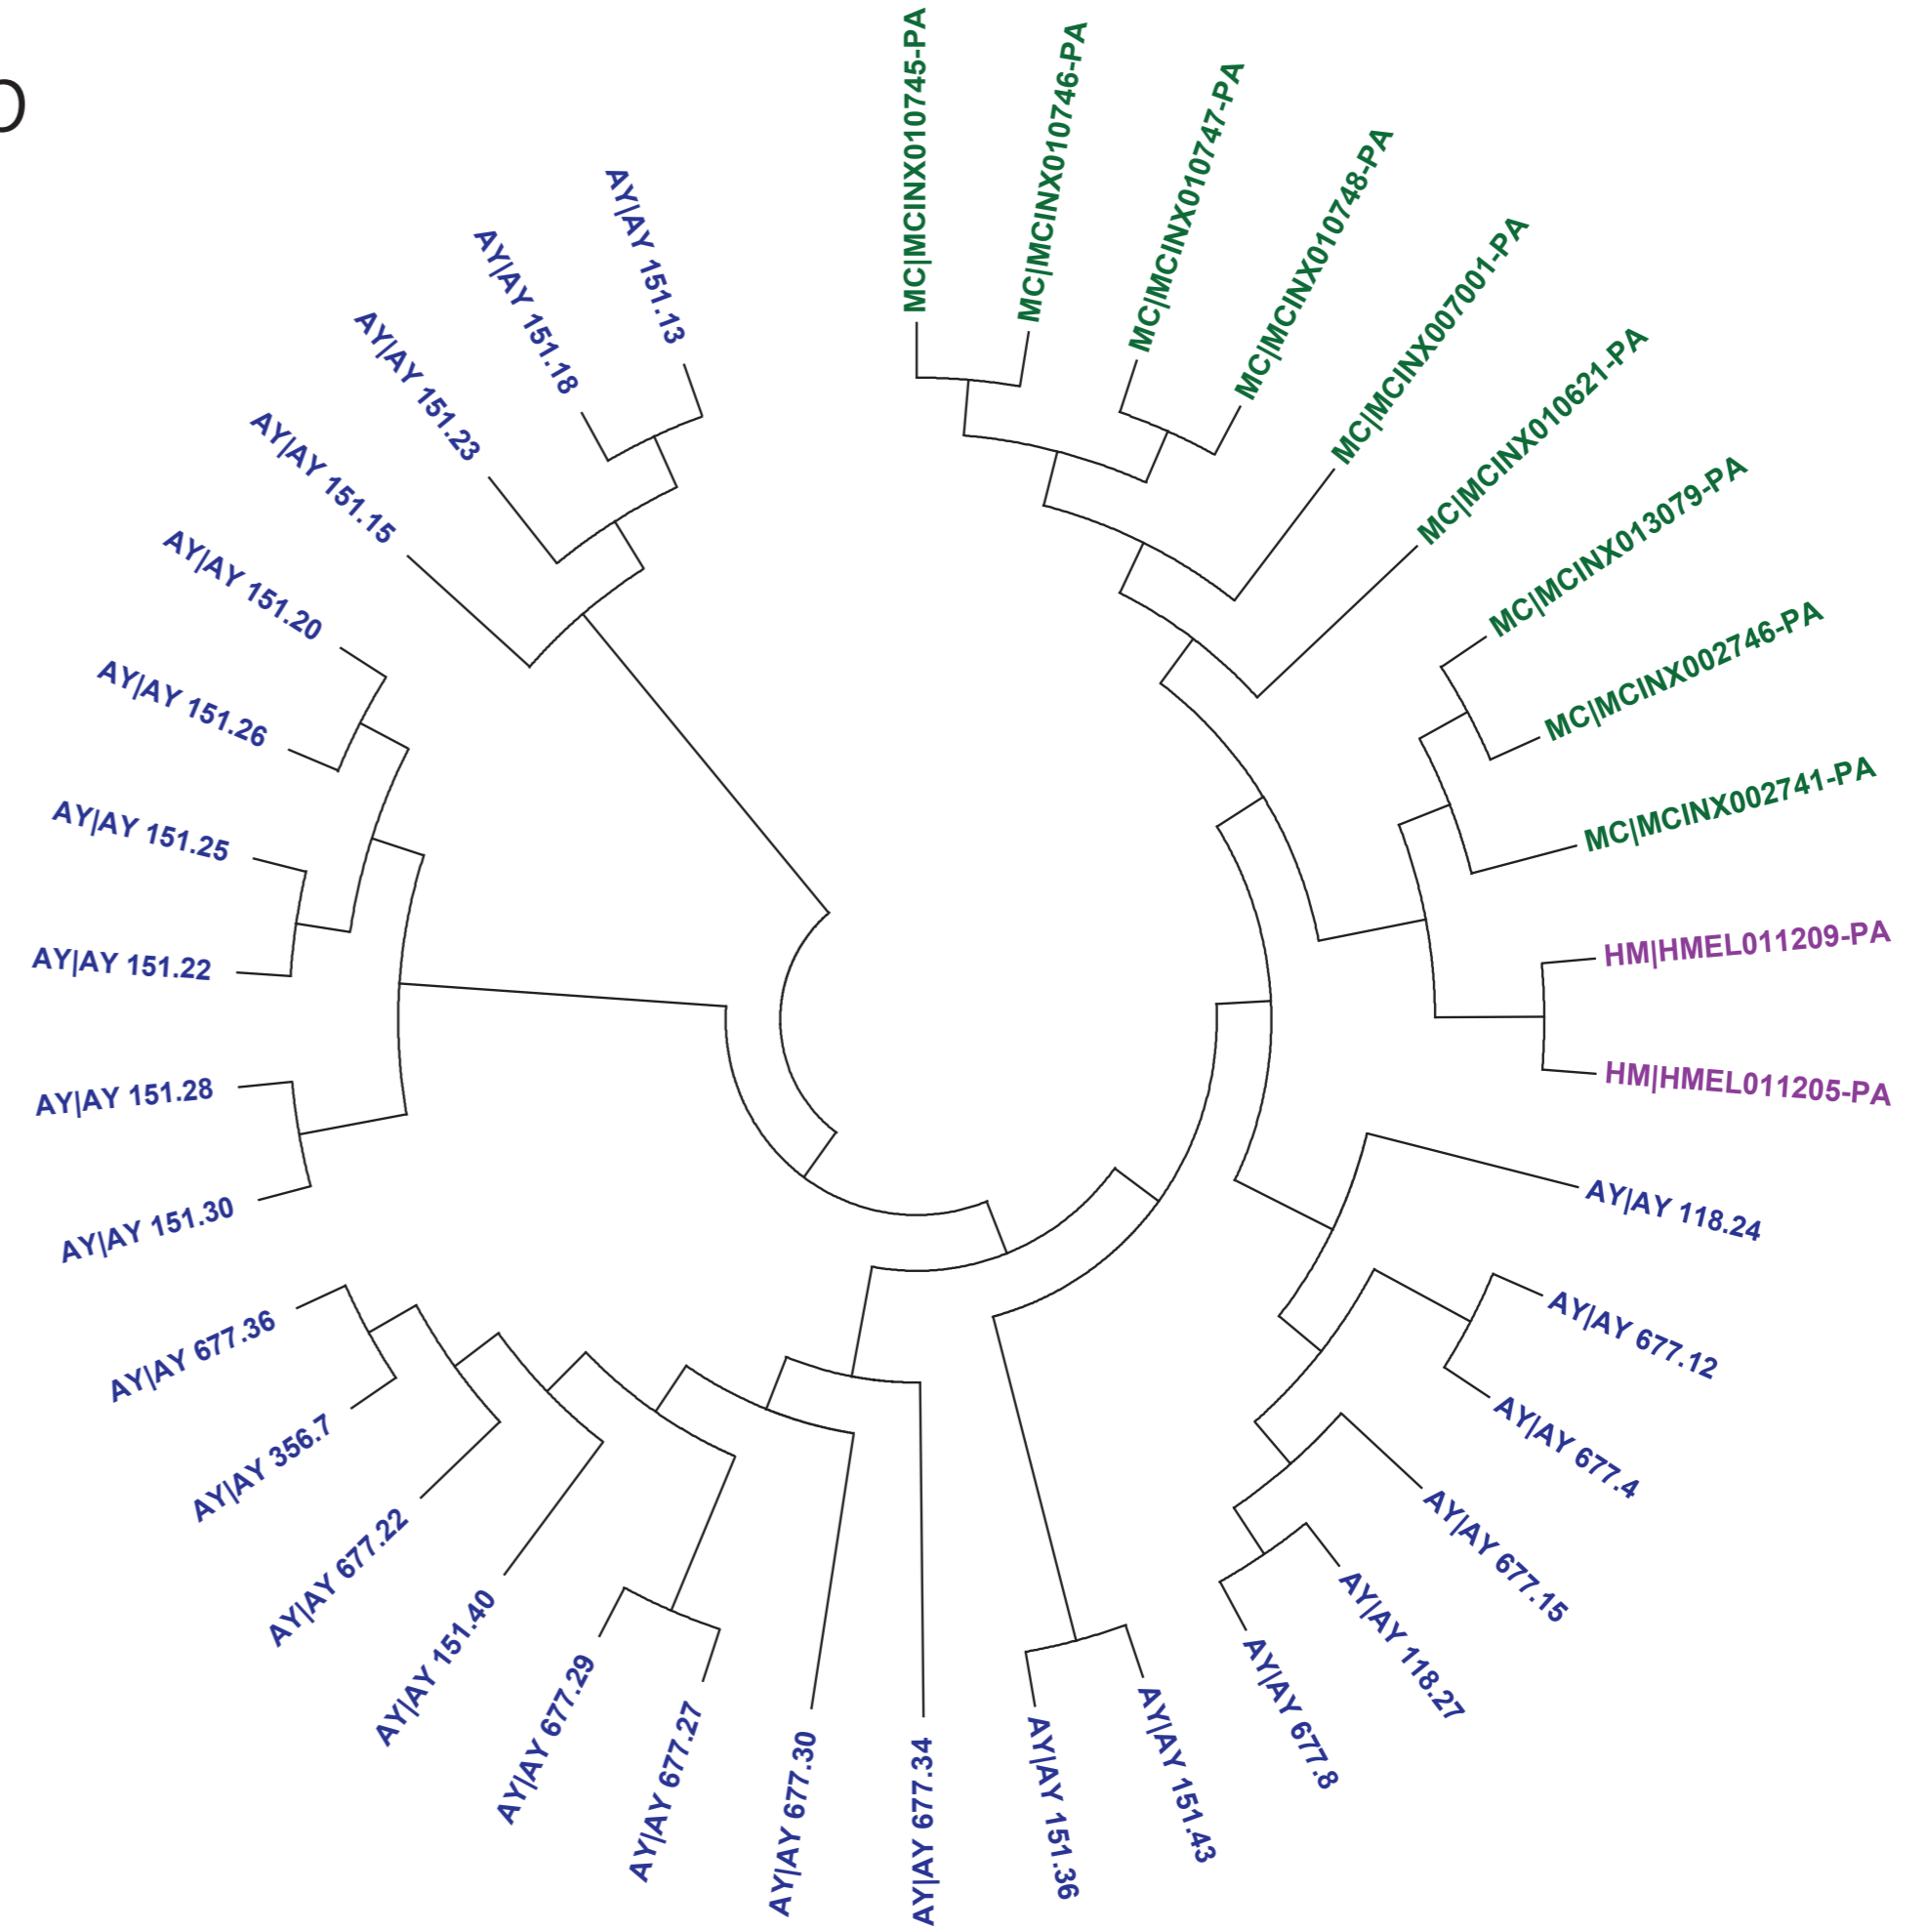

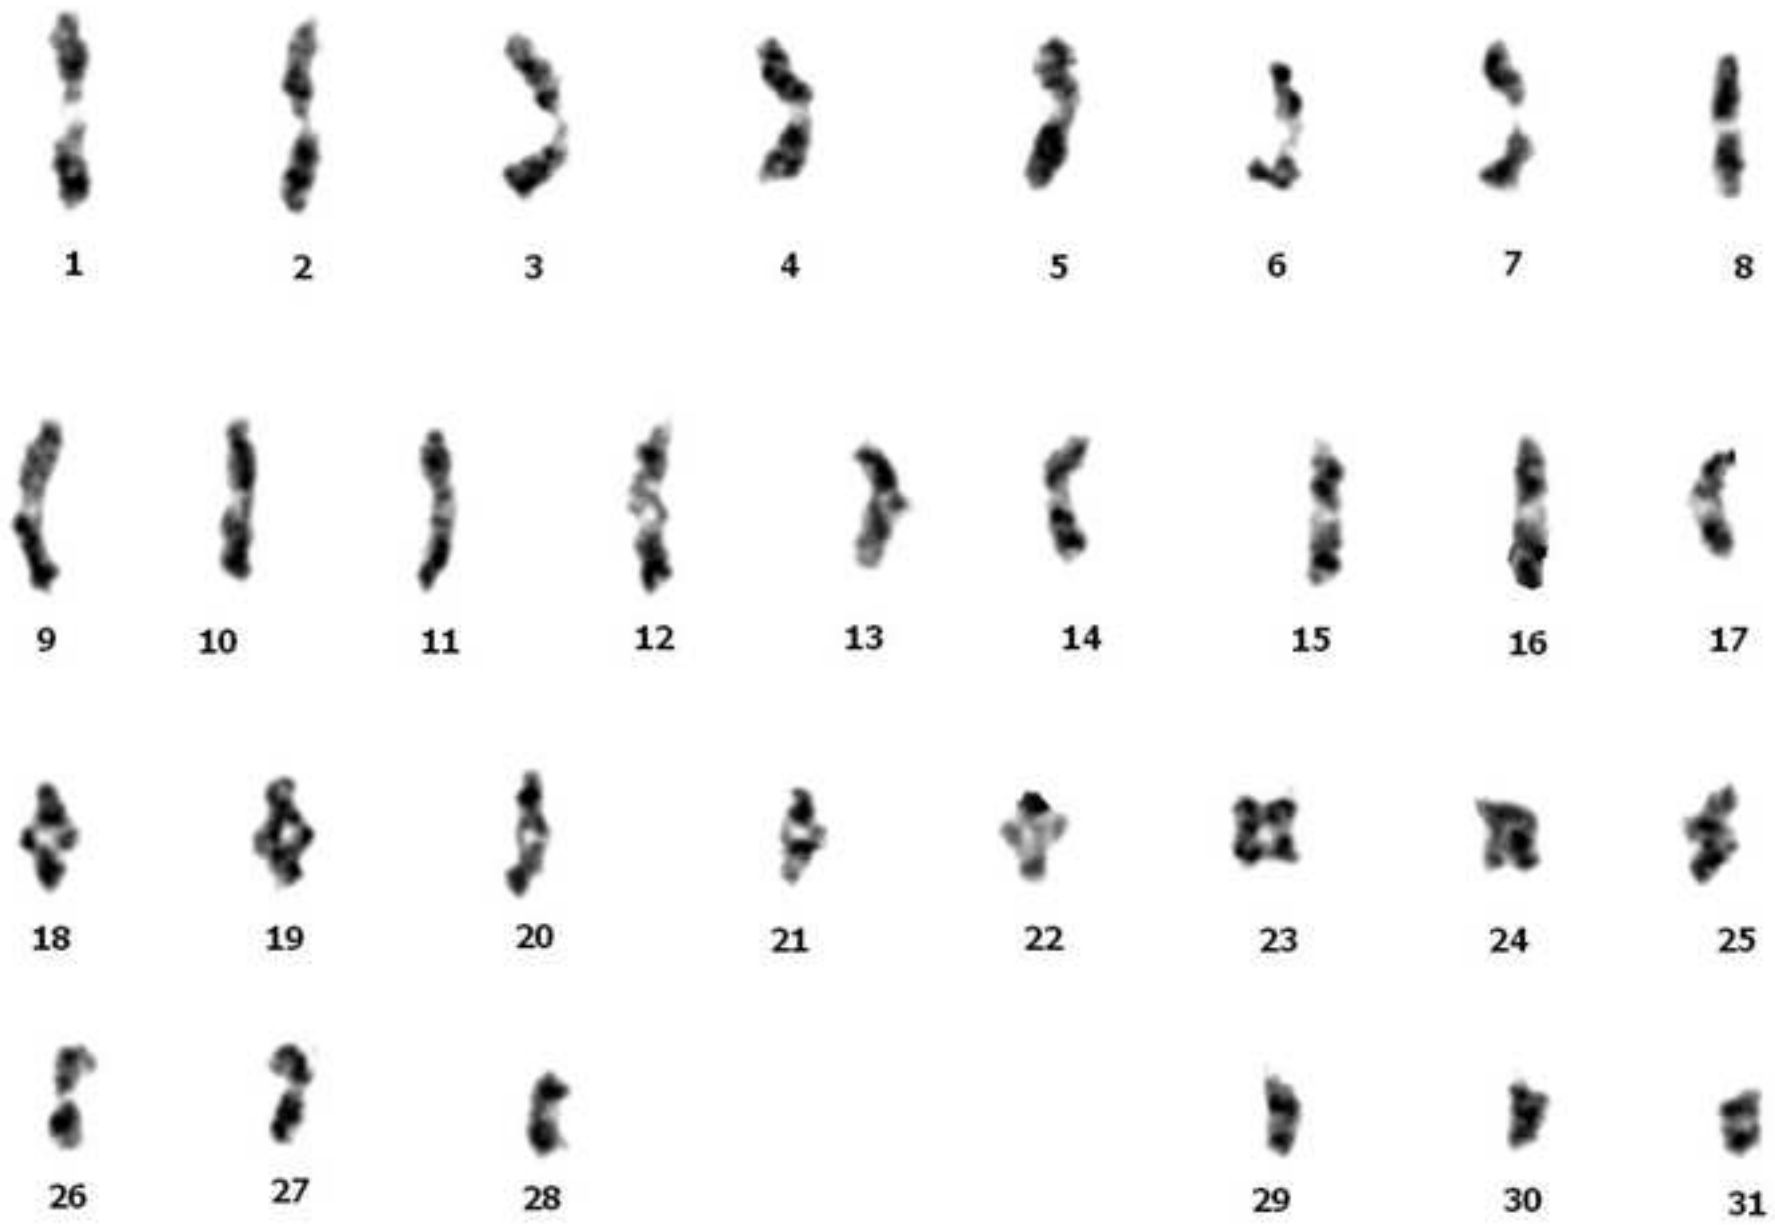

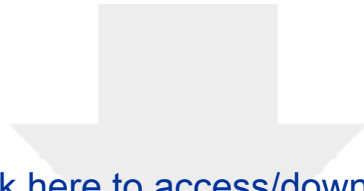

Click here to access/download  
**Supplementary Material**  
Supplementary\_Information.docx

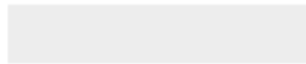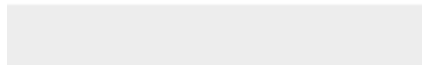



Click here to access/download  
**Supplementary Material**  
Supplementary\_information2.xlsx

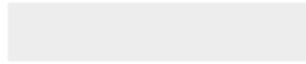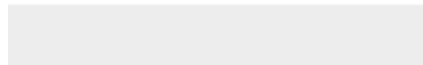



Click here to access/download  
**Supplementary Material**  
Response\_to\_Reviewer 1.docx

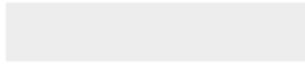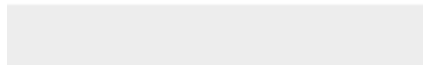



Click here to access/download  
**Supplementary Material**  
Response\_to\_Reviewer 2.docx





Oct 17, 2017

Dear Editor of *Gigascience*,

We thank for sending our manuscript out for 2<sup>nd</sup> review and for obtaining constructive suggestions from two expert referees. Especially, we want to appreciate the editor who give this great opportunity for publication in *Gigascience* of great reputation.

Remained minor concerns were fully addressed and genome data was also sent to the administrator of Lepbase followed the suggestion of reviewer 2.

We hope that our revised manuscript and supporting analysis can convince the reviewers and meet the high-quality standard of *Gigascience*.

Looking forward to hearing from you again.

Thank you.

With best regards,

Prof. Seung-Won Park

Department of Biotechnology,

Catholic University of Daegu, Gyeongsan-si, Gyeongsangbuk-do 38430, Republic of Korea,

Tel: +82-53-850-3176, E-mail: [microsw@cu.ac.kr](mailto:microsw@cu.ac.kr)
