# Supplementary material for: Genome sequence of the Japanese oak silk moth, Antheraea yamamai: the first draft genome in the family Saturniidae
Source: PubMed Central journal article supplement (PMC5774507; doi:10.1093/gigascience/gix113), 2017-11-27
Supplement: gix113_response-to-reviewer-comments_revision-1.pdf [file gix113_response-to-reviewer-comments_revision-1.pdf]

## **Author's Response To Reviewer Comments**

We appreciate suggestions of all the reviewers on our manuscript; all the comments made by the reviewers were quite valid. We have responded to all comments point-by-point in the separate rebuttal. We hope our revised manuscript can meet the quality standard of reviewers.
