# Supplementary material for: Genome sequence of the Japanese oak silk moth, Antheraea yamamai: the first draft genome in the family Saturniidae
Source: PubMed Central journal article supplement (PMC5774507; doi:10.1093/gigascience/gix113), 2017-11-27
Supplement: gix113_response-to-reviewer-comments_revision-2.pdf [file gix113_response-to-reviewer-comments_revision-2.pdf]

## **Author's Response To Reviewer Comments**

We attached two separated rebuttals for each reviewer.
